# Supplementary material for: Speeding Cis-Trans Regulation Discovery by Phylogenomic Analyses Coupled with Screenings of an Arrayed Library of Arabidopsis Transcription Factors
Source: PLoS One. 2011 Jun 27;6(6):e21524. doi: 10.1371/journal.pone.0021524 (PMC3124521; doi:10.1371/journal.pone.0021524)
Supplement: Table S1 — List of TF ORFs in the REGULATORS collection. (XLS) [file pone.0021524.s005.xls]

## Sheet: Hoja1
Table S1. List of TF ORFs in the REGULATORS collection
FAMILY	REGIA corrected?	LOCUS	TEMPLATE	ORF SIZE	SEQUENCE	COMMENTS
NAC		At1g01010	cDNA	1290	ATGGAGGATCAAGTTGGGTTTGGGTTCCGTCCGAACGACGAGGAGCTCGTTGGTCACTATCTCCGTAACAAAATCGAAGGAAACACTAGCCGCGACGTTGAAGTAGCCATCAGCGAGGTCAACATCTGTAGCTACGATCCTTGGAACTTGCGCTTCCAGTCAAAGTACAAATCGAGAGATGCTATGTGGTACTTCTTCTCTCGTAGAGAAAACAACAAAGGGAATCGACAGAGCAGGACAACGGTTTCTGGTAAATGGAAGCTTACCGGAGAATCTGTTGAGGTCAAGGACCAGTGGGGATTTTGTAGTGAGGGCTTTCGTGGTAAGATTGGTCATAAAAGGGTTTTGGTGTTCCTCGATGGAAGATACCCTGACAAAACCAAATCTGATTGGGTTATC…
B3		At1g01030	G	1077	ATGGATCTATCCCTGGCTCCGACAACAACAACAAGTTCCGACCAAGAACAAGACAGAGACCAAGAATTAACCTCCAACATCGGAGCAAGCAGCAGCTCCGGTCCCAGCGGAAACAACAACAACCTTCCGATGATGATGATTCCACCTCCGGAGAAAGAACACATGTTCGACAAAGTGGTAACACCAAGCGACGTCGGAAAACTCAACAGACTCGTGATCCCTAAACAACACGCTGAGAGGTATTTCCCTCTAGACTCCTCAAACAACCAAAACGGCACGCTTTTGAACTTCCAAGACAGAAACGGCAAGATGTGGAGATTCCGTTACTCGTATTGGAACTCTAGCCAGAGCTACGTTATGACCAAAGGATGGAGCCGTTTCGTCAAAGAGAAAAAGCTC…
AP2/EREBP		At1g01250	G	579	ATGTCACCACAGAGAATGAAGCTATCATCACCACCAGTTACCAACAACGAACCAACCGCCACCGCTTCTGCCGTTAAATCTTGCGGCGGAGGAGGTAAAGAAACCAGCTCATCGACCACGAGGCATCCAGTGTACCACGGAGTTCGCAAACGCCGATGGGGAAAATGGGTTTCTGAGATCAGAGAGCCCCGGAAAAAGTCTCGGATTTGGCTCGGATCTTTTCCGGTGCCGGAGATGGCTGCTAAGGCCTACGACGTGGCAGCGTTTTGTCTAAAAGGTAGAAAAGCTCAGCTGAATTTCCCTGAAGAAATCGAGGATCTACCTCGACCGTCCACGTGTACTCCCAGAGATATCCAAGTCGCAGCGGCCAAAGCAGCCAACGCCGTGAAGATCATCAAA…
MYB		At1g01520	cDNA	861	ATGGTGACTGTAAACCCTAGCCAAGCTCATTGTTTGCCTATGAAAATGAGTCTACCGGGTTTCAATACTCTTCCCCACACGGCAACAACGATACCGGTTTCCATACGGAGCAATAGGACGATGTCGTTTTTTGAGGATCCAACAAAGAAGGTTAGAAAGCCTTACACTATCACCAAATCTAGAGAGAACTGGACGGAGCAAGAACACGACAAGTTCCTTGAAGCCCTTCATCTATTTGACCGGGATTGGAAGAAAATAAAGGCCTTTGTTGGATCAAAAACAGTGATACAGATACGAAGCCACGCACAGAAGTACTTTCTCAAAGTTCAGAAGAATGGGACTAAAGAACATCTCCCACCTCCTCGACCAAAGAGGAAAGCCAATCACCCATATCCACAA…
NAC		At1g02210	G	264	ATGGTATGGTTCTTCTTTAGTTGTGATGAATATAACGAAGAAATATTGAAAACGAATTCGGGTTATTGGAAAGAAACTGTATCCAACACACCAATCATTGGCAAGTGGATAACTAGTAATGGTGTTAAAATTGGTGAGAAACAAGTTTTGGTTTTCCAATCGTATGAAAACATCAATGGATCCAAATCCGATTGGGTAATGCACGTGTATCAACCAACGTTTTTGCCTCCTAATCAGGTAATATTCCGAATTTATGATGTTTAA
NAC	YES	At1g02220	U68315	1185	ATGGAAACTCCTGTGGGTTTAAGATTCTGTCCGACCGACGAGGAGATCGTCGTCGATTACCTTTGGCCGAAAAATTCCGATAGAGACACGAGCCATGTCGATCGATTCATTAACACAGTCCCTGTCTGTAGACTCGATCCTTGGGAGTTACCTTGCCAGTCAAGGATCAAACTGAAAGATGTGGCTTGGTGTTTCTTCAGACCTAAGGAGAACAAATATGGCAGAGGTGATCAGCAGATGAGAAAAACGAAATCTGGGTTTTGGAAGAGTACTGGCAGACCAAAGCCTATCATGCGTAATCGCCAACAGATCGGTGAGAAAAAGATTTTGATGTTTTACACGAGTAAGGAATCCAAATCCGATTGGGTTATACACGAGTACCACGGTTTCTCTCATAAC…
AP2/EREBP		At1g04370	G	402	ATGGATCAAGGAGGTCGTAGCAGTGGTAGTGGAGGAGGAGGAGCCGAGCAAGGGAAGTACCGTGGAGTAAGGAGACGACCTTGGGGTAAATACGCCGCGGAAATAAGAGATTCGAGGAAGCACGGAGAGCGTGTGTGGCTAGGGACATTCGACACTGCGGAAGACGCGGCTCGAGCCTATGACCGAGCCGCCTATTCAATGAGAGGCAAAGCTGCCATTCTCAACTTCCCTCACGAGTATAACATGGGAACCGGATCCTCATCCACTGCGGCTAATTCTTCTTCCTCGTCGCAGCAAGTTTTTGAGTTTGAGTACTTGGACGATAGCGTTTTGGATGAACTTCTTGAATATGGAGAGAACTATAACAAGACTCATAATATCAACATGGGCAAGAGGCAA…
bHLH		At1g05710	cDNA	516	ATGGAATTCTCTAGAGACGCTGGAATGATGATGGAGAATAAGCGGAATGTCTGCTCTCTCGGAGAAAGCAGTATCAAACGCCACAAGTCTGATCTCTCTTTCAGTTCCAAGGAGAGGAAGGACAAGGTTGGAGAACGTATTTCAGCTCTTCAACAAATAGTTTCCCCTTATGGAAAGACCGACACTGCATCAGTTCTTCTAGACGCGATGCATTACATAGAGTTTCTTCACGAACAAGTGAAGGTCTGCAGTTCAATACCAAGCATGATTCATTCATCTTTATCTGAGTTCCCATGTTCTTTTGTACAGGTGCTAAGTGCTCCGTATCTGCAAACGGTACCTGATGCTACGCAGGAGGAGCTGGAGCAGTACAGCCTGAGAAACAGAGGATTATGTCTT…	Identical to MIPS. An SSP clone contains 66bp more that correspond to a sequence predicted to be an intron. This result reveals alternative splicing.
bHLH		At1g05805	cDNA	1089	ATGTACCAATCATCATCCTCCACGTCATCATCATCGCAGAGATCATCGCTTCCCGGCGGCGGAGGACTGATCCGTTACGGCTCAGCTCCGGGATCGTTTCTAAACTCTGTGGTTGACGAAGTCATCGGAGGAGGCTCATCAAACGCTCGTGACTTCACCGGCTATCAACCGTCGTCGGATAACTTCATCGGTAACTTTTTCACCGGAGCTGCTGACTCATCCTCGCTGAGATCCGATTCGACGACTTGTGGAGTCAACAACTCATCCGACGGACAGAAACAGCTAGGCAATAACAATAATAATAATAGTAATAAAGATATCTTCCTCGACAGATCCTACGGTGGATTCAACGAGATCTCGCAACAACACAAGAGCAACGACATCGGAGGAGGAAACAGC…	T instead of C but no aminoacid change
bZIP		At1g06070	cDNA	1272	ATGGATAAGGAGAAATCTCCTGCACCACCACCTAGTGGAGGTCTTCCTCCACCATCGGGTCGTTACTCTGCGTTTTCACCTAATGGAAGTAGCTTTGCAATGAAAGCTGAATCATCTTTTCCTCCTTTGACTCCAAGTGGAAGCAATAGCTCAGATGCTAACCGATTCAGCCATGATATTAGCCGAATGCCGGATAATCCACCTAAGAACCTAGGCCATCGCCGAGCTCATTCAGAGATTCTTACTCTTCCTGATGACTTAAGCTTTGATAGTGATCTTGGTGTGGTTGGTGCTGCTGATGGACCTTCTTTCTCTGATGATACTGACGAGGACTTACTCTATATGTATCTTGATATGGAAAAATTCAATTCTTCTGCTACATCGACTTCTCAAATGGGT…
AP2/EREBP		At1g06160	G	735	ATGGAATATCAAACTAACTTCTTAAGTGGAGAGTTTTCCCCGGAGAACTCTTCTTCAAGCTCATGGAGCTCACAAGAATCATTCTTGTGGGAAGAGAGTTTCTTACATCAATCATTTGACCAATCCTTCCTTTTATCTAGCCCTACTGATAACTACTGTGATGACTTCTTTGCATTTGAATCATCAATCATAAAAGAAGAAGGAAAAGAAGCCACCGTGGCGGCCGAGGAGGAGGAGAAGTCATACAGAGGAGTGAGGAAACGGCCGTGGGGGAAATTCGCGGCCGAGATAAGAGACTCAACGAGGAAAGGGATAAGAGTGTGGCTTGGGACATTCGACACCGCGGAGGCGGCGGCTCTCGCTTATGATCAGGCGGCTTTCGCTTTGAAAGGCAGCCTC…
GATA		At1g08010	U67092	912	ATGAATTGGTTACCTGAAGCTGAAGCTGAGGATGACTTCAAAGGTCTTCTCTCTGGTGATTTCTTTGATGATCTCATCAATCACCTTGACGTCCCTCTTGATGACATTGATACCACCAATGGTGAAGGAGATTGGGTTGACAGGTTTCAAGACCTTGAGCCTCCTCCCATGGATATGTTCCCCACTTTGCCTTCTGACCTCACCTCTTGCGGCTCTGGCATGGCCAAGGCCCCTCGTGTGGATATTCAAAGGAACATTCCTGCTTTGAAACAGTCCTATTCTTCTGAAGCCTTGTCCAGCACTCTCCACCAATCTTCAGCTCCTCCTGAAATCAAAGTTTCGAAACTATTTCAGTCTTTAAGTCCAGTGTCAGTTCTCGAGAACAGTTATGGTTCTCTC…
bHLH		At1g09250	cDNA	624	ATGGTGGAGTCTCTGTTCCCGAGCATCGAAAACACAGGTGAATCGTCTCGAAGAAAGAAGCCGAGGATATCAGAGACGGCGGAGGCGGAGATAGAGGCACGACGTGTCAACGAAGAAAGCTTGAAGAGATGGAAAACGAATCGTGTGCAACAGATCTACGCTTGTAAGCTCGTCGAAGCTTTACGCCGAGTTCGTCAGAGATCTTCCACCACCAGCAACAACGAGACCGATAAACTCGTCTCCGGCGCGGCGAGGGAGATACGTGATACGGCGGATCGAGTTCTAGCTGCGTCCGCTCGTGGTACGACTCGGTGGAGCAGAGCGATTTTAGCGAGTCGCGTCCGAGCGAAGCTGAAGAAACATAGAAAGGCGAAAAAGTCAACGGGAAATTGTAAATCG…
MYB		At1g09710	cDNA	1833	ATGGTTGCTAATAATAATACTAGTAGCAATCGCAGGAAGAGAATCATTACTGAAGGCGACATCGCCACTCTTTTGCTGAGATATGATATGGAGACGATACTGAGAATGCTACAGGAGATATCTTATTGTTCCGAAACCAAGATGGACTGGAATGCGTTGGTGAAGAAGACCACTACCGGAATTACTAATGCTAGAGAGTACCAGTTGCTATGGCGTCATCTTTCTTATCGGCATCCTCTCCTCCCTGTGGAAGATGATGCTCTACCTCTGGACGACGATAGTGACATGGAGTGCGAATTGGAAGCTTCTCCTGCAGTCAGCCATGAAGCATCAGTGGAGGCTATTGCACATGTCAAAGTGATGGCTGCTTCATATGTTCTAAGTGAGTCTGATATACTC…
MYB		At1g09770	cDNA	2535	ATGAGGATTATGATTAAGGGAGGTGTTTGGAAGAACACCGAAGATGAGATTCTCAAAGCCGCCGTGATGAAGTATGGTAAGAACCAATGGGCTCGGATCTCGTCTCTTCTCGTTCGTAAGTCTGCTAAACAGTGTAAAGCTCGCTGGTACGAGTGGCTCGATCCATCTATCAAAAAGACTGAATGGACCAGAGAAGAAGATGAGAAGCTTCTACATCTTGCTAAACTTCTGCCTACTCAATGGAGAACTATTGCTCCTATTGTGGGTCGTACACCATCTCAATGTCTTGAGAGGTATGAGAAGCTCCTTGATGCAGCATGCACTAAGGATGAAAATTATGATGCAGCGGATGATCCACGAAAATTACGTCCTGGTGAGATTGATCCGAACCCAGAAGCA…
bHLH		At1g10120	U66288	1101	ATGGGTGGTGAGAGTAATGAAGGAGGAGAGATGGGCTTTAAGCATGGAGATGATGAGAGTGGTGGGATCTCTAGAGTTGGAATTACATCAATGCCCTTGTATGCAAAGGCAGATCCTTTCTTCTCTTCTGCAGATTGGGATCCAGTTGTCAATGCTGCTGCTGCTGGCTTCTCCAGCTCTCATTACCATCCTTCCATGGCGATGGATAATCCAGGGATGAGTTGCTTCTCTCATTACCAACCCGGTTCTGTTTCCGGTTTTGCAGCAGACATGCCTGCTAGTCTTCTTCCGTTTGGTGATTGTGGTGGTGGTCAAATTGGTCATTTTCTTGGTTCAGACAAGAAAGGGGAAAGATTGATCAGAGCTGGAGAATCATCTCATGAGGATCATCATCAGGTT…	One base change but no aminoacid change
AP2/EREBP		At1g12610	G	630	ATGAATAATGATGATATTATTCTGGCGGAGATGAGGCCTAAGAAGCGTGCGGGAAGGAGAGTGTTTAAGGAGACACGTCACCCAGTTTACAGAGGCATAAGGCGGAGGAACGGTGACAAATGGGTCTGCGAAGTCAGAGAACCGACGCACCAACGCCGCATTTGGCTCGGGACTTATCCCACAGCAGATATGGCAGCGCGTGCACACGACGTGGCGGTTTTAGCTCTGCGTGGGAGATCCGCATGTTTGAATTTCGCCGACTCCGCTTGGCGGCTTCCGGTGCCGGAATCCAATGATCCGGATGTGATAAGAAGAGTTGCGGCGGAAGCTGCGGAGATGTTTAGGCCGGTGGATTTAGAAAGTGGAATTACGGTTTTGCCTTGTGCGGGAGATGATGTG…
AP2/EREBP		At1g12630	G	567	ATGGCTTCTGCCGGCTTAGGTAGCCGGAGAAAGGATCCGGTGTACAGAGGAATCCGGTGCCGAAGTGGGAAATGGGTCTCCGAGATTCGTGAGCCGAGGAAAACCACGAGAATCTGGCTTGGAACTTACCCCATGGCAGAGATGGCAGCAGCCGCCTATGATGTGGCTGCTATGGCTCTTAAAGGAAGAGAAGCTGTCTTGAACTTCCCTGGATCCGTCGGGTCATACCCGGTTCCTGAATCAACATCCGCAGCAGATATACGAGCCGCTGCGGCAGCCGCAGCAGCAATGAAGGGATGTGAGGAAGGGGAGGAGGAGAAAAAGGCAAAGGAGAAGAAGAGTAGTAGTTCGAAGTCGAGAGCGCGTGAGTGCCACGTAGATAATGATGTTGGATCTTCG…
AP2/EREBP		At1g12890	G	660	ATGTTGAAATCAAGTAACAAGAGAAAAAGCAAAGAAGAGAAGAAGTTACAAGAAGGGAAGTACCTTGGAGTGAGGAGACGTCCATGGGGAAGATATGCAGCTGAAATCAGAAACCCTTTTACTAAAGAAAGACATTGGCTTGGAACGTTTGATACAGCCGAAGAAGCTGCTTTTGCATATGACGTTGCTGCTCGATCCATCAGCGGCTCTCTAGCTACAACAAACTTCTTCTACACTGAAAACACCTCTTTAGAAAGACATCCACAACAGTCTTTGGAGCCTCATATGACTTGGGGATCTTCTAGTCTCTGTCTTCTTCAAGATCAGCCTTTTGAAAACAACCATTTTGTTGCTGATCCTATCTCTTCTTCTTTTTCTCAAAAACAAGAGTCTTCTACC…
MYB		At1g13300	U12283	1035	ATGATTAAAAAGTTCAGCAATATGGATTACAACCAGAAACGAGAGAGATGTGGGCAATACATCGAAGCCCTCGAAGAGGAACGTCGCAAGATTCATGTATTTCAACGTGAACTTCCTCTTTGCTTAGACCTTGTAACTCAAGCGATCGAGGCATGTAAGAGGGAGTTACCGGAGATGACGACGGAGAATATGTACGGACAACCAGAGTGCTCGGAGCAGACGACCGGAGAATGTGGGCCGGTCTTGGAGCAGTTTCTAACTATTAAAGATTCATCGACATCCAACGAAGAAGAAGATGAAGAATTCGACGATGAGCATGGAAATCACGATCCAGACAATGATTCCGAGGACAAGAACACGAAATCTGATTGGCTTAAGTCTGTTCAACTCTGGAATCAA…
C3HC4	YES	At1g14200	G	540	ATGTCTTCTGAGAATGATTTCGTTGAGTTTTCTTCTATGTTCGAGAGAATTATACAAGGAAGAGGTGATGGTCTCTCTCGATTTTTGCCGGTGATTGTAGCTTTAGCCGCCAGAGAAGACGATGATGACCAAGGATCTACCGATCAAACAACGAGACGGGGAGATCCGTTGAGTCCAAGGTTCGTGATGATCGGATCGCGATCGGGACTCGACGATTTCTTTAGCGACGGTGGAAAACAAGGGAGGTCGCCGGCGTTGAAGTCAGAAGTGGAGAATATGCCACGTGTCGTGATCGGAGAAGATAAGGAGAAATATGGTGGTTCTTGCGCGATTTGTTTGGATGAGTGGTCTAAAGGTGACGTGGCGGCGGAGATGCCTTGTAAACATAAGTTTCACTCA…
MYB		At1g14600	cDNA	768	ATGGGTAGGTGTGGAAGAAGCAACGACGGAGTAATTGGTGGAGTAAGACCATACGTACGATCTCCGGTGCCTCGTCTGAGATGGACGCCGGAGCTTCACCGGAGTTTCGTTCACGCCGTTGATTTGCTCGGCGGTCAATATAAAGCAACTCCAAAACTTGTTCTGAAGATAATGGATGTCAAGGGACTAACCATATCACACGTCAAGAGCCATCTCCAGATGTATAGGGGATCCAGAATCACTCTTCTTGGAAAACCAGAAGAGAGTTCTTCACCATCTTCAAGAAGAAGAAGAAGACAAGACAATGAAGAAGATCATCTTCATGACAACTTGCCTGTACACGCAAGGAATGATTGTCTTTTGGGTTTTCACTCTTTTAACTTTAGAGAGCAGACTTCA…
B3		At1g16640	cDNA	405	ATGGCTGACACTGGTGAGGTTCAATTTATGAAGCCTTTCATCTCAGAAAAGTCATCTAAATCATTGGAAATCCCCTTGGGATTCAACGAATACTTCCCAGCACCATTTCCAATAACTGTGGACCTCCTGGACTATAGTGGGAGATCTTGGACGGTTAGGATGAAGAAAAGAGGAGAGAAAGTGTTTCTTACAGTTGGTTGGGAGAATTTTGTAAAAGATAACAATCTCGAAGATGGCAAGTATTTGCAGTTCATCTATGACCGCGACAGGACCTTTTATGTTATCATATATGGTCATAACATGTGTAGCGAATATAGAGACTTCCCTCAAGTCGCAGTAGAGGTTGATGACTATGAAAACGGTGAAGAAGAAGAAGACGGCGACGATCAAGACAAACAT…
MYB		At1g17460	cDNA	1815	ATGTTTGGAAATGTGAAAGACTATGGAGAGACGTTTCAAGACAGTATTTTTCAGACAAGAAACGGATCACTTTCCTCAACAAATCAAATTGGAAACCCTGTTACGTACAAGCTTGTGCGGGTTGCAGGCGACGGGAGTCTAGTTCCTGCAACTGATGAAGAGATGTTGGAGGTCAAGAATTTGCTTGAGAAAAACGAGCAAGATATGCCTGTTTTACCAGATCCTATACAAACTGAGGAATACATTCCCGATGAAGGTTCACCTTCTCAGTTTCTGCAGCTAGAAAATTTTGAAGGCTTCTTTCAGTCGGAAACTGCAGGACCGTATACAGAAAATTTGAACTCTCGACATGAGTCTAAAGAGGAATTGATGAATGGATCTCAGATGCTTTTTGTTCTT…
bHLH		At1g18400	cDNA	783	ATGGCAAATTTCGAGAATCTTTCTTCTGATTTTCAGACAATAGCCATGGATATATATTCTTCCATAACTCAAGCTGCAGATCTAAACAACAACAACAGTAACCTTCATTTTCAAACATTTCATCCTTCCTCTACTTCTCTCGAATCGCTCTTCCTTCATCATCATCAACAACAATTACTTCACTTTCCCGGAAACTCTCCAGACAGTAGTAACAATTTCTCTTCAACTTCAAGTTTCCTCCATAGTGATCACAACATCGTCGATGAGACCAAGAAGAGAAAAGCTTTGTTACCTACTTTGTCTTCATCAGAGACTAGCGGCGTCTCCGATAATACGAATGTTATTGCCACTGAAACAGGTTCTTTGAGAAGAGGTAAGAGGTTGAAGAAGAAGAAGGAA…
MYB		At1g19000	U10411	858	ATGGCCGCCGTTAGTAGTTCGTCGGAGACCGGAGACTGCGGCGTTACGGGAAAGAGAGATGAGATCATGTTGTTCGGAGTTAGAGTCGTGGTTGATCCGATGAGAAAGTGTGTGAGTTTGAACAATCTCTCTGATTATGAAAAGTCTTCTCCGGAGGATGAGATCCCTAAGATAGTCACCGCCGGAGCTGGAGATGGTGAAGATAAGAACGAAACGGATGCGACGGTGATTGTCGCTGACGGTTACGCCTCCGCCAATGACGCTGTCCAGATTTCGTCTTCTTCCGGCGGGAGGAAACGAGGGGTTCCATGGACAGAGAACGAGCATAAGAGGTTCTTGATTGGGTTGCAGAAAGTAGGAAAAGGAGATTGGAAAGGAATATCAAGAAACTTTGTGAAG…
NAC		At1g19040	G	519	ATGTCAGAGGTGTTAACACGCGGGTTTCGATTTCGCCCAGCTGATGAAGAAGTGACAGACTACCTTATGCGGAAGACACAATCGCCGGAGTTCAGCTGCTTTATCAAAACCATAGACTTGTACGACAAGGATCCGTGGGTACTTGGGCATGTGAGAGATCCGTGTTACAATCACTATGAATGGTATTACTTTGTTAAGAAAAACCCCCTCGGGAATGAGTACTTAGATAAGCCTAGATTGAACGGGTTTGAACATCCACGCTTGAAATGGGATGTGTTGAAGCAGATACATGATGCTCTGAGTTCTGGTCAGAACGTCCCACCAAGTGTCTTTACTTACGGATTCCGATTTCATCCGACTGATCAAGAGCTACTCTCTTTGTACCTCACTCCAAAGGCC…
AP2/EREBP		At1g19210	G	558	ATGGAAGGGTCGTCTTCTTCGATGCAGTCAAAGTACAAAGGAGTGAGGAAGAGGAAATGGGGAAAATGGGTTTCAGAGATCAGACTTCCCAACAGCAGAGAACGTATTTGGTTGGGCTCTTACGATACTCCTGAGAAGGCGGCGCGTGCTTTCGACGCGGCTCTTTATTGTCTCCGTGGCAACAACGCAAAGTTCAATTTCCCTGATAATCCTCCGGTGATCTCCGGCGGACGTAACTTGTCGCGATCTGAGATAAGAGAAGCTGCTGCGAGGTTCGCTAATTCGGCGGAGGATGATTCAAGTGGCGGAGCAGGATACGAGATACGGCAAGAATCTGCTTCAACATCGATGGACGTTGATTCGGAGTTTTTGAGTATGCTTCCGACGGTTGGTTCGGGT…
BES1/BZR		At1g19350	cDNA	1008	ATGACGTCTGACGGAGCAACGTCGACGTCAGCTGCAGCTGCAGCAGCAGCGATGGCGACGAGGAGGAAACCGTCGTGGAGAGAGAGGGAGAACAATCGGAGAAGAGAGCGGCGGAGAAGAGCTGTTGCGGCGAAGATTTATACTGGTCTTAGAGCTCAAGGTAACTACAATCTTCCAAAACATTGTGACAACAATGAGGTTCTTAAGGCTCTTTGTTCTGAAGCTGGTTGGGTTGTTGAAGAAGACGGAACTACTTATCGCAAGGGACACAAGCCTCTACCTGGTGACATGGCTGGATCATCTTCTCGAGCAACTCCTTACTCTTCCCATAACCAAAGTCCTCTTTCTTCCACTTTTGATAGCCCCATCTTATCTTACCAAGTCAGTCCTTCCTCTTCT…
bZIP		At1g19490	cDNA	1416	ATGGAGTTGGAGCCTATATCATCGAGTTGTTGCTCGTCGTCTTCTTCTTCTTCTGGGGAGGAGAATACTGCGGCGGCGAACATGACGGAGATGGAGGCGGCAGAAGCATTGGCGGATTTAGCGCAGCTTGCGATAATGCGAGAGCAGGTTTTCGAATCTGCAGCGAGTTGGGGAAGTAAAGGGAAACGGGTGAGGAAGCGAGTCAAGACTGAGTCTCCTCCTTCTGACTCGCTTTTGAAACCACCTGACTCTGATACGTTACCTACTCCGGATCTAGCTGAGGAACGATTAGTGAAAGAAGAAGAGGAAGAAGAAGAAGTTGAACCAATAACTAAAGAACTAACTAAAGCTCCGGTTAAATCTGAAATCAATGGTGAAACACCTAAACCAATTCTTGCT…
MYB		At1g19510	cDNA	303	ATGGCCTCTAGTTCTATGAGCTCGAGCTCTTCTTGGACGTCTAAGCAAAACAAGATGTTCGAGAGGGCTTTAGCCGTTTACGATAAAGACACTCCCGACCGTTGGCAAAACGTGGCTAAAGCAGTTGGAAGTAAATCTGCAGAGGAAGTTAAACGTCACTACGACATCCTCGTTGAAGATCTCATGAACATCGAACAAGACTTAGTACCTTTGCCTAAATACAAAACCGTCGATGTTGGAAGTAAATCTAGAGGCATCGATGATTTTGATTTGAGGTTAATGAAGAATATGAGAATCCAGTGA
DOF	YES	At1g21340	G	783	ATGTTGCCGTACATTGGACACAACAGCTACCAGCAGCACCAGTTTCCGTTGCCGGAGATGGAAATTCCGGAGAAGTGGAAGCTTTCTTACGAACAAGAGGCTATTACTGCTCCGGCTTGTCCTCGTTGTGCATCGTCCAACACCAAGTTTTGTTATTACAACAACTACAGCTTGTCTCAGCCTAGATACTTCTGCAAGGGTTGCCGTCGTTACTGGACGAAAGGCGGTTCTCTCCGCAACATTCCTGTAGGTGGAGGCTGTCGCAAGAGAAGTCGAAGCAGACAGAACAGTCACAAAAGGTTTGGCCGGAACGAGAATCGGCCAGATGGTCTTATTAACCAAGATGATGGATTCCAGTCCAGCCCTCCTGGTTCTGATATTGATTTGGCTGCGGTTTTC…
AP2/EREBP		At1g22190	G	786	ATGACAACTTCTATGGATTTTTACAGTAACAAAACGTTTCAACAATCTGATCCATTCGGTGGTGAATTAATGGAAGCGCTTTTACCTTTTATCAAAAGCCCTTCCAACGATTCATCCGCGTTTGCGTTCTCTCTACCCGCTCCAATTTCATACGGGTCGGATCTCCACTCATTTTCTCACCATCTTAGTCCTAAACCGGTCTCAATGAAACAAACCGGTACTTCCGCGGCTAAACCGACGAAGCTATACAGAGGAGTGAGACAACGTCACTGGGGAAAATGGGTGGCTGAGATTCGTTTACCGAGGAATCGAACTCGACTTTGGCTCGGAACATTCGACACGGCGGAGGAAGCTGCTTTAGCTTATGACAAGGCGGCGTATAAGCTCCGAGGAGATTTT…
MYB		At1g22640	cDNA	774	ATGGGAAGATCACCATGCTGCGAGAAAGCTCACATGAACAAAGGAGCTTGGACTAAAGAAGAAGATCAGCTTCTTGTTGATTACATCCGTAAACACGGTGAAGGTTGCTGGCGATCTCTCCCTCGCGCCGCTGGATTACAAAGATGTGGTAAGAGTTGTAGATTGAGATGGATGAATTATCTAAGACCAGATCTCAAAAGAGGCAATTTTACTGAAGAAGAAGATGAACTCATCATCAAGCTCCATAGCTTGCTCGGTAACAAATGGTCTTTAATAGCTGGGAGATTACCAGGAAGAACAGATAACGAGATCAAGAACTATTGGAACACTCATATCAAGAGGAAGCTTCTCAGCCGTGGGATTGATCCAAACTCTCACCGTCTGATCAACGAATCCGTC…
AP2/EREBP		At1g25470	G	864	ATGAAGTCCTTTGTGAAACCTGAGAGAGACTCTTTGTTGAGAACAGTTCGTATTGTTTTCACTGATCCTGATGCTACTGATGATTCCTCTTCCTCTAGCGATGAATGGTTACCTAAACCTCGAAAGGTAAAGCGTTTTGTTCATGAGATTACTTTCCTCCCTCAGGTCTCCGAGAGTTCTCAGGATCGTAGCAATGCTGTCAAAACCCCTAGAAGGAAATCTACTAGGCAGTTTAAGTATCCTGTGGGAGTTAGGCCGAGGCCATCAGGCAAATTTGCTGCTGAGATTTTGAACCCATTCACTAAAACTAAGAAATGGTTGGGTACTTATGAAACTCCTGCAGAAGCTGAGAAGGCTTATGTTGACAAGAAGGTTGAGTATGATGCACTGGCTTCTTCA…
MYB		At1g25550	cDNA	1035	ATGATGATGTTCAAGAGCGGTGACATGGATTACACCCAGAAAATGAAGAGATGTCACGAATATGTAGAAGCTCTAGAAGAAGAACAAAAAAAGATTCAAGTCTTTCAACGTGAGCTCCCTTTATGTTTAGAACTTGTAACCCAAGCTATCGAGTCATGTCGGAAGGAGTTATCGGAATCTTCAGAACATGTTGGCGGCCAGTCAGAATGTTCTGAGCGGACAACTAGTGAATGCGGCGGTGCCGTGTTTGAAGAGTTTATGCCAATCAAGTGGAGTTCTGCTTCATCTGATGAAACCGATAAAGATGAAGAAGCTGAGAAAACTGAGATGATGACCAATGAAAATAACGATGGTGATAAGAAGAAATCGGATTGGCTTAGATCTGTTCAATTGTGGAAC…
AP2/EREBP	YES	At1g25560	G	1086	ATGGAATACAGCTGTGTAGACGACAGTAGTACAACGTCAGAATCTCTCTCCATCTCTACTACTCCAAAGCCGACAACGACGACGGAGAAGAAACTCTCTTCTCCGCCGGCGACGTCGATGCGTCTCTACAGAATGGGAAGCGGCGGAAGCAGCGTCGTTTTGGATTCAGAGAACGGCGTCGAGACCGAGTCACGTAAGCTTCCTTCGTCGAAATATAAAGGCGTTGTGCCTCAGCCTAACGGAAGATGGGGAGCTCAGATTTACGAGAAGCATCAGCGAGTTTGGCTCGGTACTTTCAACGAGGAAGAAGAAGCTGCGTCTTCTTACGACATCGCCGTGAGGAGATTCCGCGGCCGCGACGCCGTCACTAACTTCAAATCTCAAGTTGATGGAAACGAC…
bHLH		At1g26260	cDNA	1173	ATGAGTGACAAAGACGAGTTTGCCGCAAAGAAGAAGGATTTGGTCAATACGCCAGTGGATTTGTATCCTCCGGAGAATCCAATGTTGGGTCCTTCTCCGATGATGGATTCATTCAGAGAAACTCTTTGGCATGATGGTGGTTTCAATGTCCACACAGATGCAGACACTTCCTTTAGAGGTAATAATAATATTGATATACCTCTTGAAATGGGTTGGAATATGGCTCAGTTCCCTGCAGATTCAGGATTCATTGAGCGTGCTGCAAAGTTTTCTTTTTTTGGATGTGGTGAAATGATGATGAACCAACAACAATCATCTCTTGGAGTTCCAGATTCAACTGGCTTGTTTCTTCAAGATACACAGATTCCTAGTGGATCCAAACTAGATAATGGTCCTCTT…
HD	YES	At1g26960	U23330	768	ATGTCTTGTAATAATAATGGCTTAGCTTTCTTCCCTGAAAATTTCAGTCTCCAAAACCATCACCAAGAAGAAGAAGATCACCCTCAACTTCTTCAAGACTTCCATGGGTTTCTAGGTAAAAGATCTCCAATGAACAACGTGCAAGGGTTTTGTAATCTAGATATGAACGGAGATGAAGAATATTCAGACGATGGATCTAAGATGGGAGAGAAGAAGAGGAGATTGAACATGGAACAATTGAAGGCACTAGAGAAGGACTTTGAGCTTGGTAATAAACTTGAATCAGATCGAAAATTAGAGCTAGCTCGTGCCTTGGGATTGCAACCTAGACAAATTGCTATATGGTTCCAAAACAGAAGAGCTCGATCCAAAACCAAGCAGCTTGAGAAAGACTATGAC…
AP2/EREBP		At1g28160	G	738	ATGGAGTTCAATGGTAATTTGAATGCCGGTTCTTGCTCTAGATCAAAAAAGAGTCATAGGCAAAAGCAGCAACAACCGCAGCCACAGCCACAACAACATATTGAAGAAATAAAGTATGTAGGAGTGAGGAGGAGGCCATGGGGAAGATATGCAGCTGAGATAAGAAACCCGACGACGAAAGAGAGGTATTGGCTAGGTACTTTTGACACGGCCGAGGAGGCTGCATTGGCTTATGATAGAGCCGCACGGTCCATAAGAGGCTTGACTGCTCGAACCAACTTTGTCTACTCCGATATGCCTCGTGGCTCCTCAGTAACTTCCTTTGTGTCTCCTGATGAATCCCAACGTTTCATTTCCGAGTTATTCAACCCTCCAAGCCAACTAGAAGCTACTAACAGC…
AP2/EREBP		At1g28360	cDNA	570	ATGGCGTCAACGACGTGTGCAAGAGAGGTGCATTACAGAGGAGTCAGAAAGAGACCTTGGGGTCGCTACGCTGCTGAGATACGAGATCCTTGGAAGAAAACTAGGGTTTGGTTAGGCACTTTCGACACTCCCGAAGAAGCTGCTCTTGCTTACGACGGCGCTGCTCGTTTCCTCCGTGGTATCAAAGCCAAAACTAACTTCCCTTCTCCTCTCTCTCTCGACCTCAACCACCTCCCTTCCGCTCCCTCAGCCGCAACCGCCGCCGCAAATAACCAACCCCACCAACACCAACAGCTCTGGTTCGCTGCGCCTCCTCCTGTTCCTCCAAGCTCCGACCATCATCACCAACACCACCGCATTTTTCTCCGAACCGGTGTGCTAAACGACAAAACTTCAGAT…
AP2/EREBP		At1g28370	cDNA	501	ATGGCACCGACAGTTAAAACGGCGGCCGTCAAAACCAACGAAGGTAACGGAGTCCGTTACAGAGGAGTGAGGAAGAGACCATGGGGACGTTACGCAGCCGAGATCAGAGATCCTTTCAAGAAGTCACGTGTCTGGCTCGGTACTTTCGACACTCCTGAAGAAGCCGCTCGTGCCTACGACAAACGTGCTATTGAGTTTCGTGGAGCTAAAGCCAAAACCAACTTCCCTTGTTACAACATCAACGCCCACTGCTTGAGTTTGACACAGAGCCTGAGCCAGAGCAGCACCGTGGAATCATCGTTTCCTAATCTCAACCTCGGATCTGACTCTGTTAGTTCGAGATTCCCTTTTCCTAAGATTCAGGTTAAGGCTGGGATGATGGTGTTCGATGAAAGGAGT…
DOF	YES	At1g29160	G	528	ATGGCGACCCAAGATTCTCAAGGGATTAAACTCTTTGGCAAAACCATAACATTCAACGCCAACATCACACAGACGATAAAAAAAGAAGAGCAGCAACAACAACAACAGCCAGAGCTACAAGCAACAACAGCCGTTAGATCACCCTCATCGGATCTGACGGCTGAGAAGCGTCCAGACAAGATCATACCATGTCCGAGATGCAAGAGCATGGAGACTAAGTTTTGTTACTTCAACAACTACAACGTTAATCAACCAAGACACTTCTGCAAAGGTTGTCAACGTTACTGGACCGCCGGTGGAGCTCTCCGGAATGTTCCCGTCGGTGCCGGTCGTCGGAAGTCAAAACCTCCCGGACGTGTCGGTGGGTTCGCTGAGTTGCTTGGAGCTGCGACTGGAGCT…	Forward and reverse sequences do not overlap
Trihelix		At1g31310	G	771	ATGGCTGACCAAAGTGGTGGGTTGGTTATGATGAGAGAGTACAGAAAAGGCAACTGGACGTTGAATGAGACGATGGTTCTCATTGAGGCCAAGAGGATGGATGATGAGAGGAGGATGCGGCGGTCCATCGGCCTTCCACCGCCGGAGCAGCAACAAGATATCCGGAGTAATAAACCGGCGGAGCTACGGTGGAAGTGGATAGAAGATTACTGTTGGAGAAAAGGTTGTATGAGAAGTCAGAATCAGTGCAATGACAAATGGGACAATCTCATGAGAGACTACAAAAAAGTTAGAGAGTACGAGAGACGAAGGGTAGAATCGTCTATTACCGCCGGTGAGTCGTCTTCATCTTCAGCTCCAGCTGGAGAAACGGCGTCGTACTGGAAGATGGAGAAGAGT…	C instead of T (A instead of V)
MADS	YES	At1g31630	G	1020	ATGAGGTCGAAAATTAAGTTATCACTCATAGCTAATAAGACCTCAAGGAGAACCACATTCAGGAAGAGGAAGGGAGGGATAACGAACAAACTCCATGAGCTAACAACTCTCTGCGGCGTCAAAGCATGTGCGGTAATCTCCAGTCCGTACGAGAATCCAGTGGTGTGGCCGTCAACCGAAGGTGTTCAAGAGGCGGTTTCCATGTTTATGGAGAGGCCGGCGACAGAACAATCCAAGCTGATGATGAGTCATGAGACCTACTTGCAGGACAAAATTACCAAAGAAACAAAGAAACTGGAGAGTCTACGTCGTGAAAACCGAGAATCTCAGCTTAGGCAATTTATGTTTGATTGTGTTGAAGGTAAGATGAGTGAGCATCAGTATGGTGCAAGGGACCTT…
AP2/EREBP	YES	At1g33760	G	555	ATGGAAAACACTTACGTTGGCCAACGAGATTACCGCTTCAACGTTAACCAGTTGTCCTACAGAGGCATTCGTCGGAGGAAATGGGGCAAATGGGTATCGGAGATCCGAGAACCCGGTAAGAAAACAAGGATTTGGCTTGGAAGCTACGAGACGGCCGAGATGGCTGCAGCGGCCTACGATGCTGCGGCTCTTCACCTCCGAGGACGTGGGACCAATCTCAACTTTCCGGAACTCGTCGACAGTTTTCCTCGGCCGGAAAGCTCTAGTTCGGAGCACATTCAAGCGGCTGCACAAGATGCAGCACTTATGTTTAAACCAGGTAGGTTGAGTGAACCAGCTCTCGAGTCTGGTCAAGGACTTTCTCGAGTAGGATTGTCTCCGGATCAGATTCAAGCGATT…
NAC		At1g34190	cDNA	1674	ATGGCGGATTCTTCACCCGATTCGTGTTTCAAAGGAGGCAAATTTAGTGCTCCAGGGTTTCGATTTCATCCAACTGATGAAGAGCTTGTGATGTATTATTTGAAGAGGAAGATTTGTAGGAAGAGGCTTAGAGTTAATGTTATCGGTGTTGTTGATGTTTACAAAATGGATCCTGAGGAATTGCCTGGTCAATCAATGTTGAAGACGGGAGATAGACAGTGGTTCTATTTCACTCCAAGGAGTAGGAAGTATCCAAACGCAGCTAGGTCTAATAGAGGAACTGAAAATGGGTATTGGAAGGCTACAGGGAAGGATCGAGTCATTGAGTATAATTCTAGATCGGTGGGACTTAAAAAGACTCTTGTTTTCTATAGAGGCCGGGCTCCTAGTGGTGAGCGG…	Forward and reverse sequences do not overlap
bHLH		At1g35460	cDNA	780	ATGCAATCCACTCATATAAGCGGCGGAAGTAGCGGTGGTGGTGGTGGAGGAGGAGGAGAGGTGAGTCGAAGTGGATTATCTCGGATCCGTTCAGCTCCAGCTACTTGGATTGAAACCCTACTCGAAGAAGATGAAGAAGAAGGTTTAAAACCTAACCTTTGTTTAACAGAGCTGCTTACTGGTAATAATAACTCTGGAGGAGTGATAACGAGTCGTGACGACTCGTTCGAGTTCCTGAGTTCTGTTGAGCAAGGATTGTATAATCATCATCAAGGTGGTGGCTTTCACCGTCAGAATAGTTCTCCGGCTGATTTTCTTAGTGGGTCTGGTTCTGGGACTGATGGGTATTTCTCTAATTTTGGTATTCCGGCGAATTATGACTATTTGTCGACCAACGTT…
AP2/EREBP		At1g36060	cDNA	945	ATGGCGGATCTCTTCGGTGGTGGCCACGGCGGCGAGCTTATGGAAGCACTTCAACCTTTTTACAAAAGTGCTTCCACGTCTGCTTCAAATCCTGCGTTTGCGTCCTCAAACGATGCGTTTGCGTCTGCCCCAAACGACCTATTTTCTTCTTCTTCTTACTATAATCCTCATGCATCTTTATTCCCTTCACATTCCACAACCTCTTACCCGGATATTTATTCTGGATCCATGACCTATCCATCTTCATTCGGGTCGGATCTTCAACAACCCGAAAACTACCAATCTCAGTTCCATTACCAAAACACTATCACTTACACTCACCAAGACAACAACACTTGCATGCTTAACTTCATTGAGCCGAGCCAACCGGGTTTTATGACCCAACCGGGTCCGAGTTCG…
AP2/EREBP	YES	At1g43160	U17008	579	ATGGTGTCTATGCTGACTAATGTTGTCTCTGGTGAGACCGAACCCTCGGCATCTGCGACATGGACGATGGGTCATAAGAGAGAAAGAGAAGAGTTTTCTTTGCCTCCTCAACCATTGATTACCGGTTCAGCTGTGACTAAAGAATGTGAAAGCTCAATGTCCTTGGAGAGGCCAAAAAAATATAGAGGAGTAAGGCAACGACCATGGGGAAAATGGGCGGCGGAGATTCGAGACCCACACAAGGCGACACGTGTATGGCTTGGGACATTCGAGACAGCCGAGGCCGCCGCAAGAGCCTATGATGCGGCAGCACTTCGCTTTAGAGGAAGCAAAGCAAAGCTTAATTTCCCCGAAAATGTTGGAACTCAGACGATTCAACGAAATTCTCATTTCTTGCAA…
AP2/EREBP		At1g44830	G	636	ATGGTGAAAACACTTCAAAAGACACCAAAGAGAATGTCATCTCCATCATCATCATCTTCATCATCCTCATCAACATCATCATCATCCATAAGGATGAAGAAGTACAAGGGAGTGAGAATGAGAAGTTGGGGTTCATGGGTTTCAGAGATCAGAGCTCCTAATCAAAAGACAAGGATCTGGCTTGGTTCTTACTCAACTGCTGAAGCCGCGGCTAGAGCCTACGACGCAGCACTCCTATGTCTTAAAGGATCCTCAGCTAATAATCTCAACTTCCCAGAGATCTCAACTTCTCTCTACCATATTATCAACAATGGTGATAACAACAATGACATGTCCCCTAAGTCTATACAAAGAGTAGCAGCTGCAGCTGCTGCTGCCAACACAGATCCTTCCTCATCA…	A instead of G (N instead of D)
AP2/EREBP		At1g49120	G	990	ATGATCAGTTTCAGAGAAGAGAACATCGATCTCAACTTGATTAAAACAATTAGTGTAATCTGTAATGATCCAGACGCCACCGATTCCTCTAGCGACGATGAATCTATCTCCGGCAATAATCCTCGCCGTCAGATCAAACCAAAACCACCGAAACGTTACGTCTCAAAGATCTGTGTCCCGACGCTGATCAAAAGGTATGAGAACGTTTCGAATTCTACAGGGAATAAAGCAGCCGGAAACCGGAAAACGTCGTCGGGTTTCAAAGGCGTACGACGGAGGCCGTGGGGGAAATTTGCGGCGGAGATAAGAAATCCGTTTGAGAAGAAGAGAAAGTGGCTTGGAACGTTTCCTACTGAAGAAGAAGCAGCAGAAGCTTACCAAAAGAGTAAAAGAGAGTTT…
B3		At1g49480	cDNA	681	ATGCAAATGGATTCCGCACAGAATCAGTTCAACAAACGTGCTCGATTGTTTGAAGATCCTGAACTCAAAGATGCTAAGGTCATTTATCCATCGAACCCTGAATCTACTGAACCAGTGAATAAAGGTTATGGCGGTTCTACAGCCATCCAAAGCTTTTTCAAAGAATCTAAAGCTGAAGAAACGCCCAAGGTACTTAAGAAGAGAGGAAGGAAGAAGAAGAATCCTAATCCCGAGGAAGTAAACTCTTCAACTCCCGGTGGAGATGACTCAGAGAACCGCTCAAAGTTCTACGAGAGTGCTTCTGCTAGAAAGAGAACTGTAACTGCAGAGGAAAGAGAGAGAGCCGTCAATGCAGCCAAAACATTCGAACCAACAAATCCTTACTTTAGAGTTGTTCTG…
MYB		At1g49560	cDNA	1002	ATGGGTTCTTTAGGTGATGAGCTTAGTTTGGGATCGATCTTTGGGAGAGGAGTTTCGATGAATGTTGTGGCGGTGGAGAAAGTTGATGAACATGTTAAGAAGCTTGAAGAAGAGAAGAGAAAGCTCGAAAGTTGTCAACTTGAGCTTCCTCTGTCTTTGCAGATTTTAAACGATGCGATTTTGTATCTGAAGGATAAGAGATGTTCAGAGATGGAGACTCAACCATTGTTGAAAGATTTCATTTCTGTTAATAAACCTATTCAAGGAGAAAGAGGAATAGAATTGCTGAAAAGAGAGGAGCTAATGAGGGAGAAGAAGTTTCAGCAATGGAAAGCTAATGATGATCACACTAGTAAGATCAAGAGCAAGCTTGAGATTAAGAGAAATGAGGAGAAATCT…	Base change. S instead of R
MYB		At1g49950	cDNA	903	ATGGGTGCTCCTAAGCAGAAATGGACTCAAGAAGAAGAGTCAGCTTTAAAGTCTGGAGTTATAAAGCATGGACCTGGTAAATGGCGCACAATTCTCAAAGATCCTGAATTTAGCGGAGTCTTGTACCTGCGTTCCAATGTTGATCTTAAGGACAAATGGAGAAACATGAGTGTCATGGCAAATGGCTGGGGATCGCGCGAAAAGTCTAGGTTAGCTGTTAAAAGGACGTTCTCCCTTCCTAAACAGGAAGAGAACTCACTAGCCCTAACCAATTCTTTGCAAAGTGATGAAGAAAATGTGGATGCGACCTCTGGACTCCAAGTTTCTTCTAATCCTCCTCCAAGGAGACCTAATGTAAGGTTGGATAGCCTTATAATGGAAGCAATAGCTACCCTGAAA…	C instead of G (Q instead of E). C is missing near the stop codon and the last 2 aminoacids are substituted by 13 new aminoacids. So, the protein will be 11 aminoacids longer.
AP2/EREBP	YES	At1g50680	G	1014	ATGAGACTTGATGACGAACCAGAAAACGCCCTAGTGGTTTCGTCTTCACCAAAGACGGTTGTGGCTTCTGGCAATGTCAAGTACAAAGGAGTCGTTCAGCAACAGAACGGTCATTGGGGTGCCCAGATTTACGCAGACCACAAAAGGATTTGGCTTGGAACTTTCAAATCCGCTGATGAAGCCGCCACGGCTTACGATAGTGCATCTATCAAACTCCGAAGCTTTGACGCTAACTCGCACCGGAACTTCCCTTGGTCTACAATCACTCTCAACGAACCAGACTTTCAAAATTGCTACACAACAGAGACTGTGTTGAACATGATCAGAGACGGTTCGTACCAACACAAATTCAGAGATTTTCTCAGAATCAGATCTCAGATTGTTGCGAGTATCAACATC…
AP2/EREBP	YES	At1g51120	G	1059	ATGGACGAGATGAGCAATGTAGCCAAGACAACGACAGAGACTTCAGGCTTAACTGACTCTGTCTTGAGCCTCACGAAACGCATGAAACCTACTGAGGTTACGACCACCACAAAACCTGCCTTGTCCAACACGACGAAATTCAAAGGAGTTGTTCAGCAACAGAACGGTCATTGGGGTGCTCAGATTTACGCAGACCATCGAAGGATTTGGCTTGGAACTTTCAAATCCGCTCATGAAGCCGCTGCTGCTTACGATAGCGCATCGATTAAGCTTCGAAGCTTTGATGCTAACTCGCACCGGAACTTCCCTTGGTCTGATTTTACCCTCCATGAACCGGACTTTCAAGAGTGCTACACGACAGAAGCTGTGTTGAACATGATCAGAGACGGTTCTTATCAA…
bHLH		At1g51140	cDNA	1140	ATGGAATCAGAATTCCAGCAACATCACTTCCTTCTCCACGATCATCAACACCAGAGACCAAGAAACTCAGGATTGATTCGTTACCAATCAGCACCAAGTTCGTACTTTTCGAGTTTCGGTGAATCAATCGAAGAGTTTTTAGATCGACCCACAAGTCCTGAAACTGAGCGAATCTTATCTGGCTTTTTACAAACCACCGACACAAGCGACAACGTTGATAGTTTCCTTCACCATACTTTTAACAGTGATGGAACTGAGAAGAAACCTCCGGAAGTTAAAACAGAGGACGAAGATGCTGAAATTCCGGTGACTGCGACGGCGACGGCGATGGAGGTTGTTGTTTCCGGTGATGGTGAAATCTCAGTGAATCCTGAAGTATCGATTGGGTATGTGGCTTCG…
GATA		At1g51600	C104791	940	ATGGATGACCTACATGGAAGCAATGCTCGAATGCACATTAGAGAAGCTCAAGATCCAATGCATGTGCAATTTGAACATCATGCTTTGCATCACATCCACAATGGAAGCGGTATGGTTGATGACCAGGCTGATGATGGCAATGCTGGTGGGATGAGTGAGGGTGTGGAAACAGACATTCCTTCTCACCCTGGAAATGTAACTGACAATCGTGGTGAAGTGGTCGACCGTGGTAGTGAACAAGGAGATCAGTTAACATTGTCTTTTCAGGGCCAAGTCTACGTTTTTGACAGTGTCTTGCCTGAGAAGGTTCAAGCTGTGCTTCTATTATTGGGTGGTCGTGAATTACCTCAGGCAGCCCCTCCTGGCCTAGGATCACCTCATCAGAACAACAGAGTATCG…
AP2/EREBP		At1g53170	cDNA	558	ATGCCCAACATCACCATGGGTTTGAAACCCGACCCGGTTGCTCCAACGAACCCGACTCATCATGAGAGTAATGCTGCCAAAGAGATTCGTTACAGAGGCGTTAGGAAACGTCCATGGGGAAGATACGCCGCTGAGATCCGAGATCCGGTTAAGAAAACTCGAGTCTGGCTCGGTACGTTCGACACCGCTCAGCAGGCGGCGCGTGCTTACGACGCAGCCGCGCGTGACTTTCGTGGTGTTAAGGCTAAGACCAATTTCGGTGTTATCGTTGGTAGTAGTCCTACTCAGAGTAGCACCGTCGTCGACTCTCCCACGGCGGCACGGTTTATAACACCTCCGCACCTCGAGCTCAGCTTAGGCGGCGGCGGCGCGTGTCGTCGTAAGATCCCGCTTGTGCAT…
Trihelix		At1g54060	G	1152	ATGGAGGACGACGACGAGATTCAGTCAATTCCATCTCCGGGAGATTCTTCCCTTTCACCACAAGCTCCTCCTTCTCCGCCGATTTTGCCAACAAACGACGTGACGGTGGCCGTCGTGAAGAAACCACAACCGGGGCTTTCTTCTCAATCTCCGTCCATGAACGCTTTAGCGTTAGTGGTTCATACTCCTTCTGTAACCGGTGGTGGTGGTAGCGGAAACAGAAACGGACGAGGAGGAGGAGGAGGAAGCGGTGGTGGTGGAGGAGGAAGAGATGATTGTTGGAGCGAAGAAGCTACAAAGGTTCTAATCGAAGCTTGGGGAGATCGATTCTCTGAACCAGGTAAAGGAACTTTGAAGCAACAACATTGGAAAGAAGTAGCTGAGATTGTGAACAAGAGT…	Forward and reverse sequences do not overlap
TAF	YES	At1g54360	U16387	1401	ATGCAGGAAGCTATCAAATGCATGCGTCATGCTCGACGCACCACTTTAATGGCTCATGATGTCGATTCTGCTCTTCATTTCAGGAATTTGGAGCCTACCTCTGGCTCCAAAAGTATGCGGTTCAAGAGAGCTCCTGAGAACAGAGATCTATACTTCTTCGATGACAAAGATGTCGAGCTCAAGAATGTTATCGAAGCTCCTCTACCAAATGCACCTCCTGATGCATCTGTTTTCTCTCATTGGTTGGCAATTGATGGTATTCAACCTTCCATTCCACAGAATTCTCCTCTCCAAGCCATATCTGACCTTAAACGATCGGAATATAAGGACGATGGCTTGGCTGCTAGACAGGTGCTTTCTAAGGACCTTCAGATTTACTTTGACAAAGTCACGGAGTGG…
ZZ		At1g56280	cDNA	621	ATGGACGCTGATTCCAAGAGATTTCTAGCTACGCTTCGATCCCGATCTGAAATGTTAATGGGCTTTGAAGAAATAGATGGAGATGATGATTTCCAGGAGGAGTTTGCTTGCCCGTTCTGTGCAGAATCGTATGATATCATCGGGTTGTGCTGTCACATAGATGATGAACATACTTTAGAGTCGAAGAACGCGGTATGCCCTGTTTGTTCTCTTAAAGTGGGAGTTGATATCGTAGCACACATAACGCTTCACCATGGGAGTTTATTTAAGTTGCAGCGAAAGAGAAAGTCACGAAAAAGCGGTACCAATTCGACACTTTCACTTCTTCGGAAAGAACTAAGAGAAGGAGATCTACAAAGGTTGTTAGGATTTACTTCTCGTAATGGTTCTGTTGCGTCA…
bZIP	YES	At1g59530	G	447	ATGTTTTATACTAATATGGAGACGGTTCATAACTGCTTCAATGATGCTACGATAACCGGTGATGAAATCATTGATATATTGGCGTTTCTTCAATCAGACGAGTCGGACAATCCAAGCGGTATAAACGAGGTAGTACCGGTGGATGATAAGAAGAGAAGACGGACGATATCAAACCGGGAATCGGCCAAGAGATCGAGGATGAAAAAGAAGAAACGTTTTGAAGAGTTAACTGAAGAGGTGAACCGGTTAAACATAAGAAATCAGGAGCTGAAAAACCGGTTAGCTAATGTTGTTAGTTGTGGTAATTTTATATCTAGGGAGAATAACCGGTTGAAAACCGAATCGGTTTGCCTTGAGATAAGGCTTTTAGAGTTGTACCGTTTTTTAGTGGCCATGCAA…
ARF	YES	At1g59750	C105458	2029	ATGGCAGCTTCCAATCATTCATCTGGTAAACCTGGAGGAGTTTTAAGTGATGCTTTATGTAGGGAGCTCTGGCATGCCTGTGCTGGACCTCTTGTAACCCTACCTCGTGAAGGGGAACGAGTTTATTATTTCCCTGAAGGCCACATGGAGCAGCTCGAGGCATCAATGCACCAAGGTTTGGAGCAACAGATGCCTTCCTTCAACCTCCCATCTAAGATCCTCTGTAAAGTTATCAACATCCAGCGCAGGGCAGAGCCCGAGACTGACGAAGTATATGCGCAAATAACCTTATTGCCAGAACTGGATCAAAGCGAACCCACTAGCCCAGATGCCCCTGTTCAAGAACCTGAAAAGTGCACCGTACATTCATTTTGCAAGACACTAACTGCTTCAGACACA…	Forward and reverse sequences do not overlap
NAC		At1g60240	G	528	ATGATGAAGTCAAGACGTGAACAATCAATCGAAGAAGCAATCGTCGCAAATTATTTGAAGATGATGATCGATAACGTAAACGTTTGGCCTCGCCACTTCCTCCGAAGCGAAGACGTGTACTGCAAGAATCCGTGGACGCTTTTCGTTACTAGAGATCCTATAATCCTACACTTCGGACGATACTTCTTCGTTAATCGGAGTGTGAATTCAGGTTTAACCGATGGATGTGAATACGGTTGTTGGAGAATCATCGGTCGTGATAGAGTGATCAAGTCGGTGACGACCGGGAAGATTCTAGGGTTAAAGAAGGTTTATAAGTTCTGTGAAACTGATCGGAAACCGAAATCGGTTTTTAAGTTCTTGGAAAAGGAGAAGAGAAGAGTAAGAGATAGACGAATC…
bHLH		At1g61660	cDNA	1182	ATGGCGGAGGAGTTTAAAGCTACGGCATCGATTTGTGGTGGCGGAGGTGGCGCGTGGTGGAACTCGCCAAGGAGCGTTATGTCTCCTTCGGATCATTTCTTGTCACCATGCTTCGGAGCGGCTATCACTTCCAATGATTTTAGCTCGCAAGAGAATCATCTCAAATCTAGGATGACTTGTACGGACAACAACAACATCGTTTTCGGGCAGCGAGAGGCGGATTCTGACAGTGGAGGAAGTACCGTGACGATGGACTCGACGTTGCAGATGATGGGTCTAGGGTTTTCCTCAAATTGTTCTTCAGATTGGAACCAAACCATTTTACAAGAAGACTTAAACTCAAGCTTCATAAGGAGCTCACAAGATCAAGATCATGGCCAAGGATTCTTATCCACAACT…
AP2/EREBP		At1g63030	G	546	ATGGAAAACGACGATATCACCGTGGCGGAGATGAAGCCAAAGAAGCGTGCTGGACGGAGGATTTTCAAGGAGACACGTCACCCAATCTACAGAGGCGTGCGGCGTAGGGACGGCGACAAATGGGTATGCGAAGTCCGTGAACCGATTCATCAGCGTCGAGTCTGGCTCGGAACTTATCCGACGGCAGATATGGCCGCACGTGCTCACGACGTGGCGGTTCTTGCTCTGCGCGGGAGATCCGCGTGTTTGAATTTCTCCGATTCTGCTTGGAGGTTGCCGGTGCCGGCATCCACTGATCCGGACACGATCAGGCGCACGGCGGCCGAAGCAGCGGAGATGTTCAGGCCGCCGGAGTTTAGTACAGGAATTACGGTTTTACCCTCAGCCAGTGAGTTTGAC…
GRAS		At1g63100	cDNA	1977	ATGTTGGCAGGTTGTTCGAGTTCATCATTGTTGTCGCCTACTCGAAGATTGAGGAGTGAAGCAGTAGCAGCAACATCAGCAACAGTATCAGCGCATTTTCCCATGAACACACAGAGATTGGACTTACCATGCAGTAGTAGCTTCTCTCGCAAGGAAACTCCTTCTAGCAGACCACTTGGAAGAAGCATCTCTCTTGACAACAGCAACAACAACAACAACAAACCGATCGAGCGCAAGACGAAGACCAGTGGTTGTTCGCTTAAACAGAACATAAAGCTTCCACCTTTGGCAACAACAAGAGGAAATGGAGAAGGGTTTTCTTGGAACAACGACAACAACAACAGAGGGAAGAGTTTGAAGAGATTAGCTGAGGAGGACGAGTCTTGTTTGAGCAGAGCG…	Forward and reverse sequences do not overlap
WRKY		At1g64000	cDNA	588	ATGGAAGGGGTTGACAACACAAATCCTATGTTAACCCTAGAAGAAGGCGAAAACAACAATCCTTTTTCTTCCTTAGATGACAAAACATTAATGATGATGGCTCCTTCGTTAATCTTTTCGGGCGATGTAGGTCCATCTTCTTCTTCTTGTACTCCAGCAGGTTATCATCTATCTGCTCAGCTGGAGAACTTTCGAGGAGGTGGAGGAGAGATGGGAGGATTAGTGAGTAATAATAGCAATAATAGTGATCATAATAAGAATTGCAACAAAGGAAAAGGGAAGAGAACTTTGGCAATGCAGAGGATAGCTTTTCATACAAGGAGTGATGATGATGTTCTTGATGATGGTTATCGTTGGCGAAAGTACGGTCAGAAATCTGTCAAGAACAATGCTCATCCC…
DOF	YES	At1g64620	U20433	1059	ATGGACACTGCTAAATGGCCTCAGGAGTTTGTTGTGAAGCCAATGAACGAGATCGTGACAAACACATGCCTAAAACAACAGTCGAATCCTCCTTCTCCTGCTACTCCTGTGGAAAGGAAGGCAAGACCGGAGAAAGACCAGGCTTTGAACTGTCCAAGATGCAACTCCTTAAACACCAAGTTCTGTTACTACAACAACTACAGCCTGACGCAGCCCAGGTACTTTTGTAAAGACTGCAGGAGGTATTGGACCGCAGGTGGTTCCCTCAGGAACATCCCCGTCGGTGGCGGCGTCCGCAAGAACAAGAGATCTTCTTCCAATTCCTCTTCCTCTTCACCCTCTTCGTCTTCTTCTTCAAAGAAACCTCTTTTTGCCAACAACAACACGCCTACGCCTCCT…
bHLH		At1g66470	cDNA	897	ATGGCACTCGTTAATGACCATCCCAACGAGACCAATTACTTGTCAAAACAAAATTCCTCCTCTTCCGAAGATCTCTCCTCGCCGGGACTGGATCAGCCAGATGCAGCTTATGCCGGTGGAGGAGGAGGAGGAGGCTCGGCTTCGAGCAGTAGCACGATGAATTCAGATCATCAACAACATCAGGGGTTTGTATTTTACCCATCCGGTGAAGATCATCACAACTCTTTGATGGATTTCAACGGATCATCATTTCTTAACTTTGATCATCACGAGAGCTTTCCTCCTCCAGCCATAAGCTGTGGTGGTAGTAGCGGTGGGGGCGGCTTCTCCTTCTTGGAGGGCAACAACATGAGCTACGGCTTCACAAACTGGAATCATCAACATCATATGGATATTATT…
MYB		At1g67710	cDNA	1566	ATGGAGAAAAGCGGCTTCTCTCCCGTCGGTCTAAGGGTTCTTGTCGTAGACGATGATCCAACTTGGCTCAAGATTCTCGAGAAAATGCTCAAGAAGTGTTCTTACGAAGTAACGACCTGTGGATTAGCTAGAGAGGCTTTGAGGTTGCTGAGGGAGCGTAAAGATGGATATGATATCGTGATCAGCGATGTGAACATGCCTGACATGGATGGTTTCAAGCTTCTTGAGCATGTTGGTCTTGAATTAGACCTCCCTGTAATAATGATGTCGGTGGACGGCGAAACAAGCCGAGTGATGAAGGGAGTGCAACACGGAGCTTGTGATTACCTCTTGAAGCCGATAAGAATGAAGGAGTTAAAGATTATATGGCAACATGTTCTGAGAAAGAAGCTTCAAGAA…
MYB		At1g68670	cDNA	1065	ATGATGGTGGAGATGGATTACGCTAAGAAAATGCAGAAATGTCATGAATACGTTGAAGCACTTGAAGAAGAACAGAAGAAAATCCAAGTCTTTCAACGCGAGCTTCCTTTATGTTTAGAGCTTGTCACTCAAGCGATCGAAGCTTGTCGGAAGGAGTTATCTGGTACGACGACAACTACATCAGAACAGTGTTCAGAACAGACCACAAGTGTTTGTGGTGGTCCTGTCTTTGAAGAGTTTATTCCTATCAAGAAAATTAGTTCCTTGTGTGAAGAAGTACAAGAAGAAGAAGAAGAAGATGGTGAACATGAATCTTCTCCAGAACTTGTGAATAATAAGAAATCAGATTGGCTTAGATCTGTTCAGCTATGGAATCATTCACCGGATCTAAATCCAAAA…
AP2/EREBP	YES	At1g68840	G	1059	ATGGATTCTAGTTGCATAGACGAGATAAGTTCCTCCACTTCAGAATCTTTCTCCGCCACCACCGCCAAGAAGCTCTCTCCTCCTCCCGCGGCGGCGTTACGCCTCTACCGGATGGGAAGCGGCGGGAGCAGCGTCGTGTTGGATCCCGAGAACGGCCTAGAGACGGAGTCACGAAAGCTACCATCTTCAAAATACAAAGGTGTTGTTCCTCAGCCTAACGGAAGATGGGGAGCTCAGATCTACGAGAAGCACCAACGAGTATGGCTCGGGACTTTCAACGAGCAAGAAGAAGCTGCTCGTTCCTACGACATCGCAGCTTGTAGATTCCGTGGCCGCGACGCCGTCGTCAACTTCAAGAACGTTCTGGAAGACGGCGATTTAGCTTTTCTTGAAGCTCAC…
bHLH		At1g68920	U22189	1461	ATGGATTTAAGTGCGAAAGATGAGTTTTCAGCAGAGAAGAGGAATCCTGATAACTATGATTCTGTTAATAATCCGTCTGGAGATTGGCGAGTTGATTCATATCCTTCAGAGAATCTGATTTCAGCTGGTCCTGCGTCTTGTTCTCCTTCTCAGATGATGGATTCATTTGGGCAAACTCTTTGGTATGATCCCACGAGTGTTCAGGCTGTTGGTTATGCCGGTTTTAATGGTGGTAATGCTTCGTCTTCTTCGTTTAGGGGTAGTATTGATAGATCTCTTGAAATGGGTTGGAATCTGCCTAATTTGTTGCCTCCTAAAGGCAATGGTCTTTTCTTACCGAATGCGAGTAGTTTCCTTCCTCCGAGTATGGCTCAGTTCCCGGCTGATTCAGGTTTTATA…
bHLH		At1g69010	cDNA	936	ATGAGAACCGGAAAAGGAAATCAAGAGGAAGAAGATTACGGAGAAGAAGACTTTAACTCTAAACGTGAAGGTCCTTCTTCCAACACTACTGTTCATAGCAACAGAGATTCAAAGGAAAATGATAAAGCTAGTGCGATACGTTCTAAACATTCGGTCACTGAGCAACGTAGAAGAAGCAAAATCAATGAAAGATTTCAGATATTGAGAGAACTAATTCCCAACAGTGAACAAAAACGTGACACTGCTTCATTCCTTTTAGAGGTGATAGATTATGTTCAGTATTTACAAGAGAAGGTGCAAAAGTATGAAGGATCGTATCCAGGTTGGAGTCAGGAACCAACAAAGTTGACGCCATGGAGGAATAATCATTGGCGAGTTCAAAGTTTGGGGAACCACCCA…
TCP	YES	At1g69690	G	978	ATGGATCCGGATCCGGATCATAACCATCGACCCAACTTCCCTCTCCAGCTTCTTGATTCTTCTACCTCCTCCTCTTCCACTTCCTTAGCCATCATCTCTACTACTTCCGAACCTAACTCCGAACCTAAGAAGCCTCCTCCTAAACGAACCTCTACTAAAGACCGACACACCAAAGTCGAAGGCCGAGGCCGTCGGATCCGTATGCCTGCCATGTGTGCTGCACGTGTCTTTCAGCTCACACGTGAGCTTGGTCACAAATCCGACGGTGAAACTATTGAGTGGCTACTCCAACAAGCAGAACCAGCGGTTATAGCCGCTACAGGGACTGGAACCATTCCGGCTAACTTCACTTCTTTAAACATCTCACTTCGTAGCTCAAGATCTTCTCTCTCTGCTGCT…
HD	YES	At1g69780	U14565	885	ATGTCTTGTAATAATGGAATGTCTTTTTTCCCTTCAAATTTCATGATCCAAACCTCTTACGAAGATGATCATCCTCATCAATCTCCATCTCTTGCTCCTCTTCTTCCTTCTTGCTCTCTACCTCAAGATCTCCATGGATTTGCTTCGTTTCTAGGTAAGAGATCTCCAATGGAAGGGTGTTGTGATTTAGAAACAGGGAACAATATGAATGGAGAAGAGGATTATTCAGATGATGGGTCACAAATGGGAGAGAAGAAGAGGAGATTGAACATGGAACAAGTGAAGACACTAGAGAAGAACTTTGAGCTTGGAAACAAACTTGAACCAGAGAGGAAAATGCAGCTAGCTCGTGCCTTAGGTTTGCAACCAAGACAGATCGCGATTTGGTTTCAAAATCGA…
MYB		At1g70000	cDNA	786	ATGTCACGTAGTTGCTCACAGTGTGGAAACAACGGCCACAACTCTCGCACATGTCCGACGGACATAACTACCACCGGTGACAACAACGACAAAGGCGGCGGGGAGAAAGCCATCATGCTTTTTGGCGTCCGCGTCACGGAAGCTTCATCATCTTGTTTTAGAAAAAGTGTTAGTATGAACAATCTCTCTCAATTCGATCAAACTCCTGATCCCAACCCAACCGATGACGGTGGTTACGCTTCAGACGACGTCGTTCACGCCTCCGGTAGAAACCGTGAACGCAAACGAGGAACTCCATGGACAGAGGAAGAACATAGATTGTTTCTTACTGGATTGCATAAAGTTGGAAAAGGTGATTGGAGAGGAATCTCTAGAAACTTTGTTAAAACTCGAACACCT…
AP2/EREBP		At1g71520	G	432	ATGGATTCAAGAGACACCGGAGAAACTGACCAGAGCAAGTACAAAGGTATCCGTCGTCGGAAATGGGGAAAATGGGTATCAGAGATTCGTGTCCCGGGAACTCGTCAACGTCTCTGGTTAGGCTCTTTCTCCACCGCAGAAGGCGCTGCCGTAGCCCACGACGTCGCTTTTTACTGCTTGCACCGACCATCTTCCCTCGACGACGAATCTTTTAACTTCCCTCACTTACTTACAACCTCCCTCGCCTCCAATATATCTCCTAAGTCCATCCAAAAAGCTGCTTCCGACGCCGGCATGGCCGTGGACGCCGGATTCCATGGTGCTGTGTCTGGGAGTGGTGGTTGTGAAGAGAGATCTTCCATGGCGAATATGGAGGAGGAGGACAAACTTAGTATCTCC…
bHLH		At1g72210	cDNA	963	ATGGCCTTGGAGGCTGTAGTTTACCCGCAAGATCCGTTCTCCTACATCTCTTGCAAAGATTTTCCGTTTTACGACTTATACTTTCAAGAAGAAGAAGATCAAGATCCACAAGATACTAAGAACAACATTAAGCTAGGGCAAGGACAAGGACATGGTTTTGCGAGTAATAATTACAACGGTAGAACCGGAGATTATAGTGATGATTATAATTACAACGAAGAGGATCTCCAATGGCCACGAGACCTTCCTTATGGATCTGCCGTCGACACCGAGAGCCAGCCTCCACCGTCGGATGTGGCGGCGGGAGGAGGGAGGAGGAAAAGGAGGAGGACGAGGAGTAGCAAGAACAAAGAAGAGATCGAGAACCAGAGGATGACTCACATCGCCGTTGAAAGAAAT…
AP2/EREBP		At1g72360	G	636	ATGTCTCAAAGCTTTGAACTTTATCCATGGCTAGGCTCAGCATCAGATGGGAAGAAGAAACAGAGCAGTCGGTACAAAGGAATCAGAAGAAGGCCTTGGGGAAGATGGGCGGCTGAGATACGTGATCCAATCAAAGGAGTTCGAGTTTGGCTCGGGACTTTCAACACAGCTGAAGAAGCTGCAAGAGCTTATGATCTTGAAGCTAAGAGAATCCGTGGAGCCAAAGCTAAGCTCAATTTCCCTAACGAATCCTCTGGAAAGAGGAAAGCCAAGGCTAAGACTGTGCAACAGGTAGAGGAGAATCATGAGGCTGATCTTGATGTGGCGGTGGTAAGCTCAGCGCCTAGTAGTAGCTGTCTTGATTTCTTGTGGGAGGAGAATAATCCGGACACGCTTCTG…
MYB		At1g72650	cDNA	1875	ATGGGAACTGTGGTTGGAACTGTTGAGGACCGCAGAGATATGTTTGAGGGCAATGCTCAGACAAGGATCACACCATTTTCTTCAACAAATCAGATTGGAAATCCTGTTGCCTACAAGCTTGTCCGGGTTTCAGGAGATGGGAGTCTAGTGCCTGCAACCGATGAAGAAATTTTGGAAGTCAATGACACCGATATGCATATTCCATCAGATACTTGTCAGACTATAGGCTACCTTGCAACCGATGAAGAAAATGTGGAGGTCGATGAGACGGATATGCATATTGCATCAGATGCTTGTCAGACTATAGGTTACCTTCCAGCTGAAGGGATACCTTCTCGGTTGTCCCAGATTGAAAGTTCAGAAGCTATCAATTCAGGTTTATTGCATTCTGATAATGTG…
bHLH		At1g74500	cDNA	282	ATGTCGGGAAGAAGATCACGTTCGAGGCAATCATCAGGAACTTCAAGGATCTCAGAAGATCAAATCAATGATCTGATTATCAAGTTGCAACAGCTTCTTCCTGAGCTCAGGGACAGTCGTCGTTCCGACAAGGTTTCAGCAGCGAGGGTGTTACAAGATACGTGCAACTACATACGGAATCTGCATAGAGAGGTTGATGATCTAAGTGAGAGGCTATCTGAGTTACTAGCAAACTCAGACACTGCACAAGCTGCTTTAATCAGAAGCTTACTTACCCAATAA	Three bases missing after the ATG (S missing).Also E en lugar de K
MYB		At1g74840	cDNA	798	ATGGCCGACGGTAGTACTAGTTCTTCGGAGTCCACTACCGCCTGCGCTGGAAGCGGCACAAGAAGAGAGATTATGCTGTTCGGAGTCAGGGTTGTGCTTGACCCGATGAGAAAGTGCGTGAGTTTGAACAATCTGTCTGACTATGAACAGACGGCGGAGACTCCAAAGATCGACGGCGAAGATAGAGATGAACAAGATATGAACAAAACCCCGGCCGGTTACGCCTCGGCGGATGAAGCTCTTCCCATGTCTTCTTCTAACGGCAAAATCGAGAGGAAACGAGGAGTTCCATGGACTGAAGAAGAACACAAGCTGTTCTTGCTTGGGCTGCAGAGAGTCGGTAAAGGAGATTGGAAAGGAATATCAAGAAACTTTGTCAAGACCAGAACCTCTACACAA…
AP2/EREBP	YES	At1g74930	G	588	ATGGTGAAGCAAGCGATGAAGGAAGAGGAGAAGAAGAGAAACACGGCGATGCAGTCAAAGTACAAAGGAGTGAGGAAGAGGAAATGGGGAAAATGGGTATCGGAGATCAGACTTCCACACAGCAGAGAACGAATTTGGTTAGGCTCTTACGACACTCCCGAGAAGGCGGCGCGTGCTTTCGACGCCGCTCAATTTTGTCTCCGCGGCGGCGATGCTAATTTCAATTTCCCTAATAATCCACCGTCGATCTCCGTAGAAAAGTCGTTGACGCCTCCGGAGATTCAGGAAGCTGCTGCTAGATTCGCTAACACATTCCAAGACATTGTCAAGGGAGAAGAAGAATCGGGTTTAGTACCCGGATCCGAGATCCGACCAGAGTCTCCTTCTACATCTGCATCT…
bZIP	YES	At1g75390	G	522	ATGAATAATAAAACTGAAATGGGATCTTCCACAAGTGGAAATTGCTCGTCGGTTTCAACCACTGGTTTAGCTAACTCCGGTTCAGAATCTGATCTCCGGCAACGTGATCTAATCGACGAGCGGAAGAGAAAGAGGAAACAGTCGAACAGAGAATCTGCGAGGAGGTCGAGGATGAGGAAGCAGAAGCATTTGGATGATCTCACTGCTCAGGTGACTCATCTACGTAAAGAAAACGCTCAGATCGTCGCCGGAATCGCCGTCACGACGCAGCACTACGTCACTATCGAGGCGGAGAACGACATTCTCAGAGCTCAGGTTCTTGAACTTAACCACCGTCTCCAATCTCTTAACGAGATCGTTGATTTCGTCGAATCTTCTTCTTCAGGATTCGGTATGGAG…
AP2/EREBP	YES	At1g75490	G	621	ATGTCATCCATAGAGCCAAAAGTAATGATGGTTGGTGCTAATAAGAAACAACGAACCGTCCAAGCTAGTTCGAGGAAAGGTTGTATGAGAGGAAAAGGTGGACCCGATAACGCGTCTTGCACTTACAAAGGTGTTAGACAACGCACTTGGGGCAAATGGGTCGCTGAGATCCGCGAGCCTAACCGAGGAGCTCGTCTTTGGCTCGGTACCTTCGACACCTCCCGTGAAGCTGCCTTGGCTTATGACTCCGCAGCTCGTAAGCTCTATGGGCCTGAGGCTCATCTCAACCTCCCTGAGTCCTTAAGAAGTTACCCTAAAACGGCGTCGTCTCCGGCGTCCCAGACTACACCAAGCAGCAACACCGGTGGAAAAAGCAGCAGCGACTCTGAGTCGCCGTGT…
AP2/EREBP	YES	At1g77200	G	735	ATGACCGAGTCATCCATTATCTCCGTCAAACAATCGTCTCCGGTGCCGGAGGAGGAGGATCATCATCATCACCAACAAGACTCCCACCGAACCAACACCAAGAAACGTGTAAGATCCGACCCGGGTTACCGAGGCGTCCGGATGCGAACGTGGGGCAAATGGGTCTCCGAGATCCGAGAGCCTCGCAAGAAGAGCCGAATCTGGCTAGGCACTTTCTCCACACCGGAAATGGCGGCGCGTGCACATGACGCAGCTGCTCTCACCATTAAAGGAACTTCCGCCGTCCTCAACTTCCCGGAGCTCGCCACTTACCTTCCCCGTCCAGCTTCCTCCTCTCCACGCGACGTTCAAGCCGCAGCCGCCGTAGCGGCCGCCATGGACTTCTCCCCCTCCTCCTCC…
ARF	YES	At1g77850	C104833	1758	ATGTCACCGCCGTCGGCAACCGCCGGTGACATCAACCACCGTGAAGTAGACCCGACGATCTGGCGCGCTTGTGCTGGAGCCTCCGTCCAGATCCCTGTCCTTCACTCTAGGGTTTACTACTTTCCACAAGGTCACGTTGAGCACTGTTGCCCTCTCCTCTCTACTCTTCCTTCCTCCACCTCGCCGGTTCCATGTATCATCACTTCAATTCAGTTGCTCGCCGATCCGGTCACCGACGAGGTCTTTGCTCACCTTATTCTTCAACCGATGACGCAGCAGCAGTTTACTCCGACTAATTATTCACGATTCGGCAGATTCGATGGCGATGTTGATGATAACAACAAGGTGACTACCTTCGCCAAAATTCTCACGCCTTCTGATGCTAACAATGGAGGTGGC…	Forward and reverse sequences do not overlap
BES1/BZR		At1g78700	cDNA	978	ATGACATCAGGGACGAGAATGCCGACATGGAGGGAAAGAGAGAACAACAAGAGAAGAGAAAGACGACGGAGAGCAATCGCAGCTAAGATCTTCACCGGATTAAGAATGTACGGTAATTACGAGCTTCCGAAGCATTGCGACAACAACGAAGTGCTTAAAGCACTCTGTAACGAAGCTGGTTGGATCGTCGAACCTGATGGAACTACTTACCGCAAGGGATGTAGTAGACCTGTAGAGCGTATGGAGATAGGTGGTGGTTCAGCAACCGCTAGTCCTTGCTCTTCCTATCAGCCAAGTCCCTGTGCTTCTTATAATCCTAGTCCAGGCTCCTCCAACTTCATGAGTCCTGCTTCATCCTCATTTGCTAATCTTACCTCTGGTGATGGCCAATCTCTCATC…	A instead of C (T instead of P)
MYB		At2g01760	U25329	1149	ATGCCGATCAACGATCAGTTTCCTAGTGGGTTAAGAATACTCGTTGTAGACGATGATACTTCATGCTTGTTCATTCTCGAGAAAATGCTTCTCCGTCTCATGTACCAAGTTACAATTTGCTCACAAGCTGATGTTGCGTTAACCATTCTAAGAGAAAGAAAAGACAGTTTTGATTTGGTGCTAAGTGATGTTCATATGCCTGGTATGAATGGTTACAATCTTCTTCAACAAGTTGGTCTTCTTGAAATGGATCTTCCTGTCATTATGATGTCTGTTGATGGAAGAACAACTACAGTCATGACTGGAATCAACCATGGAGCTTGTGATTATCTAATCAAACCTATTCGTCCTGAAGAGCTTAAGAACATTTGGCAACATGTTGTTAGAAGGAAATGTGTG…
MYB		At2g02060	cDNA	771	ATGGGTAAGTCTAGTGGTAGAAATGGTAACGGAAGCTTTAACGGCAATAAATTTCACGGAGTTAGACCTTACGTACGGTCTCCAGTTCCACGGCTTAGATGGACGCCGGATCTTCACCGTTGTTTCGTTCACGCCGTCGAGATTCTCGGTGGTCAACACCGAGCAACACCAAAACTTGTTCTTAAGATGATGGATGTGAAGGGACTTACCATTTCACATGTCAAAAGCCACCTTCAGATGTATAGAGGAGGTTCAAAGCTCACTTTGGAGAAACCAGAAGAAAGCTCATCATCTTCAATAAGAAGAAGACAAGACAGTGAAGAAGATTATTATCTTCATGACAACTTGTCTTTACACACAAGGAATGATTGTCTTTTGGGTTTTCACTCTTTTCCTCTT…
MADS	YES	At2g03710	cDNA	774	ATGGGAAGAGGGAAAGTTGAGCTGAAGAGGATAGAGAACAAGATCAATAGACAAGTTACTTTTGCAAAGAGAAGAAATGGTTTGCTCAAGAAGGCTTATGAGCTTTCTGTCCTTTGTGATGCTGAGATTGCTCTTCTCATTTTCTCTAACCGTGGCAAGCTCTACGAATTCTGCAGCAGCCCTAGTGGTATGGCGAGGACGGTTGATAAGTATAGAAAACATAGTTATGCAACAATGGATCCAAATCAATCAGCTAAAGACTTGCAGGATAAGTATCAAGACTACTTGAAGCTTAAATCAAGAGTTGAGATCCTTCAACATTCACAAAGGCATTTGCTAGGTGAAGAGCTATCCGAGATGGATGTGAATGAGCTTGAGCATCTCGAACGCCAAGTAGAT…
B3		At2g16210	PENTR221-AT2G16210	876	ATGGCTACGAACGCTGGTTATCTTCGGTGCAAAGAAGAGCGCAAGAATGAAAGCTTCTTCAAGGTTGTTCAGAGTATAAATGTTTCTTCAGAAAACAAGAGAGCACTTCCACATGACTTTTCGAGAAGCTTCACCGACAAAGAGCTCTCACGTAAGATGAAGATAAGAGCGCAATGGGGAAACTCTTGGGAAGTAGGAATCTCTAAAAACCCTAGATTTTACTTCATGGAGAAGTCTGGCTGGGAGAAGTTTGTGAGGGACAATGCTTTGGGAAACAGTGAGTTACTTACCTTCACTCACAAAGGGAAAATGCACTTTACCGTGAACATCTTTAAGCTAGACGGGAAAGAGATGATGCAACCTCCACAATCCAGATCCTTCTTTGCTTCTTCAAGTCGT…
bZIP	YES	At2g18160	G	516	ATGGCGTCATCTAGCAGCACATACCGGAGCTCAAGCTCTTCCGACGGTGGTAATAATAACCCGTCGGACTCCGTCGTCACCGTCGACGAACGAAAACGTAAAAGAATGTTATCGAACAGAGAATCTGCACGTAGGTCAAGGATGCGTAAACAGAAACACGTTGATGATCTAACGGCTCAGATCAATCAGCTATCAAACGACAACCGTCAGATCTTGAACAGCCTCACCGTAACATCTCAGCTTTACATGAAGATCCAAGCCGAGAACTCTGTTCTCACCGCTCAGATGGAGGAGCTTAGCACCAGACTCCAATCTCTCAACGAGATCGTTGATCTTGTTCAATCCAACGGTGCAGGATTTGGTGTTGACCAGATCGACGGCTGTGGTTTTGATGATCGT…
bHLH		At2g18300	cDNA	1008	ATGTTGGAAGGTCTTGTCTCTCAAGAAAGCTTGTCCTTAAACTCTATGGACATGTCTGTACTTGAAAGGCTTAAATGGGTACAACAGCAACAACAGCAACTGCAACAAGTTGTGTCCCATAGCAGTAATAATTCACCTGAACTTCTTCAGATACTTCAGTTCCATGGAAGCAACAATGATGAGTTGTTGGAGAGTAGTTTCAGCCAATTTCAAATGCTTGGATCTGGTTTTGGACCAAACTATAACATGGGTTTTGGTCCTCCACATGAATCCATTTCAAGAACAAGTAGCTGCCATATGGAACCTGTGGATACAATGGAGGTTTTGTTGAAGACCGGTGAAGAAACCAGAGCCGTTGCCTTGAAGAACAAGAGAAAACCAGAGGTTAAGACAAGGGAA…	6 extra bases (2 extra aminacids)
MYB		At2g20570	cDNA	1263	ATGTTAGCTCTGTCTCCGGCGACAAGAGATGGTTGCGACGGAGCGTCAGAGTTTCTTGATACGTCGTGTGGATTCACGATTATAAACCCGGAGGAGGAGGAGGAGTTTCCGGATTTCGCTGACCACGGTGATCTTCTTGACATCATTGACTTCGACGATATATTCGGTGTGGCCGGAGATGTGCTTCCTGACTTGGAGATCGACCCTGAGATCTTATCCGGGGATTTCTCCAATCACATGAACGCTTCTTCAACGATTACTACGACGTCGGATAAGACTGATAGTCAAGGGGAGACTACTAAGGGTAGTTCGGGGAAAGGTGAAGAAGTCGTAAGCAAAAGAGACGATGTTGCGGCGGAGACGGTGACTTATGACGGTGACAGTGACCGGAAAAGGAAG…
AP2/EREBP		At2g20880	G	1011	ATGGCTACTGCTAAGAACAAGGGAAAATCAATCAGGGTCCTTGGTACCAGTGAAGCAGAGAAAAAGGATGAGATGGAGTTGGAGGAGGAGTTCCAGTTTAGTAGCGGCAAGTATAAAGATTCGGGTCCTGGCTCGGACATGTGGTTAGGAGATGCTTCCTCTACGTCTCCAAGAAGTCTTAGGAAGACTAGAACCTTTGACCGACATAATCCCTATCTCGTATCTTCTTATGCTACTCCTCAGCCGCCAACAACAACTACATGCTCTGTCTCTTTTCCCTTTTACCTCCCTCCAGCGATTCAAAATCAACAACGATTTTTACACCCGAATGACCCTTCAGGACAAAGACAGCAACAAATGATCTCGTTTGATCCTCAACAACAGGTGCAACCATATGTT…
bZIP	YES	At2g21230	cDNA	1560	ATGGGTGGTGGTGGTGATACAACAGATACCAATATGATGCAGAGAGTTAATTCTTCTTCTGGTACATCGTCTTCTTCGATCCCTAAACACAATCTTCACTTGAATCCTGCTCTTATCCGCTCTCACCATCACTTCCGTCACCCTTTCACCGGAGCTCCTCCACCGCCGATTCCACCCATTTCTCCTTACTCTCAGATCCCGGCGACTTTACAACCTAGACATTCTCGCTCTATGTCGCAACCGTCTTCTTTCTTCTCCTTTGATTCATTGCCGCCGTTAAATCCTTCTGCTCCGTCGGTTTCGGTGTCGGTGGAGGAGAAAACCGGTGCCGGATTTAGTCCTTCGTTGCCTCCGTCACCGTTTACGATGTGTCATTCTTCTAGCTCTAGGAACGCCGGA…	Forward and reverse sequences do not overlap
MYB		At2g21650	cDNA	306	ATGGCATCAGGCTCAATGTCTTCTTATGGCTCTGGCTCATGGACTGTTAAGCAGAACAAAGCCTTTGAGCGTGCTCTAGCAGTCTATGACCAAGACACTCCGGACCGTTGGCACAATGTTGCTAGAGCTGTTGGTGGTAAAACACCAGAAGAAGCTAAGAGACAGTATGACCTTCTAGTTCGTGACATCGAAAGCATCGAGAATGGTCACGTGCCATTCCCTGACTACAAGACTACTACAGGAAACAGCAACAGAGGCAGGCTGCGTGATGAGGAAAAGAGGATGAGAAGCATGAAGCTGCAGTGA	A instead of G (K instead of E)
AP2/EREBP		At2g22200	G	786	ATGGAAACTGCTTCTCTTTCTTTCCCTGTCCCAAACACGAGCTTCGGTGTAAACAAATCTATGCCTCTCGGTCTAAACCAGCTCACACCATACCAAATTCATCAGATTCAGAACCAGCTTAACCATAGACGTAGCACAATCTCAAACCTCTCTCCAAACCGTATCAGAATGAAGAACTTAACACCTTCTACCTCCAAAACCAAGAATCTCTACAGAGGCGTAAGGCAAAGGCACTGGGGGAAATGGGTCGCTGAGATCCGTTTGCCCAAGAACCGGACCCGTCTCTGGCTCGGGACATTCGAAACCGCCGAAAAAGCCGCCTTAGCTTACGACCAAGCTGCTTTTCAGCTCCGTGGAGATATCGCGAAGCTTAACTTCCCAAACCTCATACACGAAGAC…
AP2/EREBP		At2g25820	G	501	ATGGCAGCGCGTGCCCATGATGTTGCGGCATTGAGTATCAAAGGAAGTTCCGCAATCCTTAACTTCCCTGAGCTCGCGGATTTTCTGCCAAGACCAGTCTCGCTCAGCCAACAGGATATCCAGGCCGCAGCCGCCGAAGCCGCTCTTATGGATTTCAAAACTGTACCATTCCATCTTCAGGATGACTCAACGCCGTTGCAAACTAGGTGTGATACTGAGAAGATCGAAAAGTGGTCATCCTCATCGTCCTCAGCCTCATCCTCATCCTCATCTTCGTCCTCGTCCTCATCATCTATGCTTTCGGGGGAGCTAGGAGATATTGTGGAGTTGCCGAGTCTTGAAAACAATGTAAAATACGATTGTGCGCTGTATGACTCGTTGGAGGGGCTGGTGTCGATG…
HD		At2g27990	U61257	1755	ATGGATATGATAAAACCAGATTTTCAACAAATCCGAAGAGATAAGTTTAGAGTTGAGCAAATGAATGATTTTCCCAACACTTGGACTCAGCAGCAGCATCAGAACATCAGAATTCCCAACAACCTTGATTTGATTGGTATCTTACAGAACCAGATTTCCGTACCGGTTCAAACCGATTTGTATCAAGATTCTGCCGCAACCTTTATGAACATGCCTCAGTCGATACATAGAGACCCACAAGGCCCTAGTAATTGGAGAATCAGTGATTTGTCACAACCTAGTACCGTGAATCACGGATATGATCAGGCTGGTATTAGGCCAAACAACGTTGCAGATTTGTTGTCCGATCATTTCAGTTCTCGAAACCAAATATTGGACCGTCCTCTTTATGTCGGCCGG…
CCHC	YES	At2g28910	G	999	ATGCCGGCGACAGCAGGAAGAGTGCGTATGCCCGCAAACAATCGGGTGCATAGTAGTGCAGCGCTTCAGACTCATGGAATATGGCAGAGTGCGATTGGTTATGATCCTTATGCACCAACTAGTAAAGAAGAGCCTAAGACGACACAACAGAAAACCGAAGATCCCGAGAACTCGTACGCGAGTTTTCAGGGACTTTTGGCTCTTGCTAGGATTACGGGTTCGAATAACGATGAGGCTCGTGGTTCTTGTAAGAAGTGTGGCCGTGTTGGGCATTTGACGTTTCAGTGTAGGAATTTCTTGAGTACTAAGGAGGATAAGGAGAAAGATCCTGGTGCGATTGAAGCTGCGGTTTTGTCGGGGTTGGAGAAGATTAGGAGAGGTGTTGGTAAAGGTGAGGTT…
C3HC4	YES	At2g30580	cDNA	1263	ATGGAAGGAGACATGGTGGCTAAAGTGAAGAGAGAAACGGTGGTGGCATGCATGACTTGTCCTCTCTGTGACAAACTCCTCCGTGACGCCACTACCATTTCAGAGTGTCTTCACACGTTTTGTAGGAAATGCATTTATGAGAAAATCACAGAGGATGAGATAGAGAGCTGTCCAGTATGCGATATTGACCTCGGGGGTACCCCACTGGAGAAACTAAGGCCTGACCACATTTTGCAAGACTTGAGAGCCAAATTATTTCCTCTAAAACGTAAAAAGGAGAGAGCGCCTGAAGTTGTGTCCTCCATCTCATTACCTGCAAAGAGGAAGGAGAGGTCTATCTCGTCTTTGGTGGTAAGCACACCCAGGGTTTCAGCACAAGCTGGTACAACAGGAAAAAGA…
bHLH		At2g31220	U50165	1377	ATGGAAGAAGAAAGAGAAAGCCTTTACGAGGAAATGGGTTGTTTCGATCCCAACACTCCAGCAGAAGTTACGGTGGAGAGTAGCTTCTCTCAAGCCGAACCACCACCACCACCACCGCAAGTTCTGGTTGCCGGAAGCACAAGCAACAGCAACTGCAGTGTTGAGGTAGAAGAGCTCTCTGAATTCCATCTCAGCCCACAAGATTGTCCTCAAGCTTCTTCAACACCTCTCCAGTTTCACATCAATCCTCCTCCTCCACCACCTCCTCCTTGTGATCAACTCCACAACAATTTGATTCACCAAATGGCTTCACATCAACAACAACACTCTAATTGGGATAATGGGTATCAGGATTTTGTGAATTTGGGACCTAACTCTGCAACAACTCCTGATTTGCTT…
bZIP	YES	At2g31370	U14527	1197	ATGGATAAGGAGAAATCTCCAGCACCTCCTTGTGGAGGTCTTCCTCCTCCATCTCCATCAGGTCGATGCTCTGCATTCTCAGAAGCTGGTCCCATTGGTCATGGTTCAGATGCTAATCGAATGAGTCATGATATTAGCCGTATGCTTGATAACCCACCTAAGAAGATTGGACATCGGCGAGCTCATTCTGAAATACTTACTCTCCCTGATGATTTGAGCTTTGATAGTGATCTTGGTGTGGTTGGTAATGCTGCTGATGGAGCTTCTTTCTCTGATGAGACTGAAGAAGATTTGCTCTCTATGTATCTTGATATGGATAAGTTTAATTCTTCTGCTACATCTTCTGCCCAAGTTGGTGAGCCATCAGGAACTGCTTGGAAAAATGAGACAATGATGCAG…
SET	YES	At2g33290	G	1956	ATGAGTACATTGTTACCATTTCCTGACCTCAACCTCATGCCGGATTCTCAATCCTCCACCGCCGGAACCACAGCCGGCGACACTGTAGTCACCGGAAAGTTAGAAGTGAAATCGGAACCAATTGAGGAATGGCAAACTCCACCATCGTCTACCTCCGATCAATCAGCCAATACCGATCTCATCGCCGAGTTTATTCGTATCTCAGAGCTCTTCCGCTCGGCATTCAAGCCACTGCAGGTCAAAGGATTAGACGGAGTCTCCGTATACGGATTGGATTCTGGTGCCATCGTTGCTGTACCGGAGAAAGAAAACCGGGAATTGATTGAACCGCCTCCAGGATTTAAGGATAATCGAGTCTCCACCGTCGTTGTCTCGCCGAAATTCGAGAGACCGAGAGAG…	Forward and reverse sequences do not overlap
Trihelix		At2g33550	cDNA	945	ATGGCTCTGGAACAGTTAGGATTAGGAGTGAGCGCCGTTGACGGTGGAGAGAACAGTAGCGCGCCGTCAAATGACGGTGGAGATGACGGCGTTAAGACGGCGAGACTTCCTCGTTGGACGAGACAAGAGATTCTGGTTCTGATTCAAGGGAAGAGAGTGGCGGAGAACAGAGTCCGGCGAGGGAGAGCGGCGGGTATGGCTCTCGGGTCGGGTCAAATGGAGCCTAAATGGGCTTCTGTTTCGTCTTACTGTAAACGTCACGGTGTAAATCGTGGGCCGGTTCAGTGCCGGAAAAGATGGAGCAATCTCGCCGGAGATTATAAGAAGATTAAAGAATGGGAGTCTCAGATTAAGGAAGAGACTGAGTCCTATTGGGTTATGAGGAATGATGTTCGTAGA…	9 bases are missing
C3HC4	YES	At2g34000	G	456	ATGGGTTTCAATGATCCTTCATTAAACACAATCATCCTTTGGTTCGCCTCCGTAACGTCTCTCGTGACTATCTCAGTCATCTTCGCCCTTCTCATTATTTGTTTACTCAAACGCCGTAGGTTTGATGTATCACCGGAAACCGAGAACGAGAACCAAGGAAGAAGAGAGCCACGGTGCCAAGGGCTTAGCGCTTCCGTGATTGCTGCCTTTCCCACCTTTTCTTACAAACCGGATAATAATGATCCTGAGAGCAACAATCAGGAGATCGAGTGTCCGGTTTGCTTAGGATTAATCCCCAAGAATGTTGTAATTAAGGTTTTACCAAATTGTATGCACATGTTTGATGAGGAATGTATCGGTAAGTGGCTTGAATCACACGCAACTTGTCCTGTGTGTCGT…
B3		At2g35310	U67560	867	ATGGCTAGAAACAGTGACAATGATATGTGCAAAGAAGAACGGAAGAGAGAGAGCTTCTTCAAGGTTCTACAGAGAGTTGATATTTCTTCTGAGAACATGAGAGCACTTCCTTACGACTTTGTGAGAAGCTTCTCCAACAATGAGCTCTCTCGTAAGATGAAGATAAAAGCTCGATGGGGAAGTTCTTGGGAAGTAGAAATCTGCAAAAATCCAAGATTCTATTTCATGGAGAAATCCGGATGGGAGAAGTTTGTGAGTGACAATGCCTTGGGAGCCAGTGAGTTTCTTACCTTCACTCACAAAGGGAATATGCGTTTTACAGTGAACATCTTCATGCAAGATGGCAAGGAGATGCTACAGCCTCCACAATCCATGTCCTTCATGGCTTCTTCTAGGCCA…
bZIP		At2g35530	cDNA	1230	ATGGCTAGCAATGAGATGGAAAAATCGAGTAAAGAGAAGGAACCTAAAACACCTCCTCCTTCTTCTACTGCCCCTCCCTCTTCACAGGAACCTTCATCGGCTGTGAGTGCTGGCATGGCTACTCCAGATTGGTCTGGTTTTCAGGCATATTCTCCTATGCCGCCGCCTCATGGTTATGTGGCATCTAGTCCCCAACCTCACCCTTATATGTGGGGAGTTCAGCATATGATGCCTCCTTATGGAACTCCGCCTCATCCTTATGTTGCAATGTATCCCCCAGGTGGCATGTACGCACATCCTTCAATGCCTCCGGGTTCTTATCCCTATAGCCCTTATGCTATGCCTTCTCCAAATGGAATGACTGAAGTTTCTGGCAATACTACAGGCGGCACTGATGGT…
AP2/EREBP		At2g36450	G	555	ATGCAAGGAACCTCCAAAGACAATGGCGGCCGCCACCCTTTGTACAGGGGAGTAAGGCAGCGAAAGAACTCAAACAAATGGGTTTCTGAGATCCGTGAGCCGAGAAAACCTAACCGTATCTGGTTAGGAACATTCTCTACCCCCGAGATGGCGGCAATAGCCTATGACGTGGCAGCTCTAGCCCTCAAAGGCAGTCAAGCTGAGCTCAACTTCCCAAACTCAGTTTCCTCTTTGCCTGCCCCAACCTCCATGTCTCCAGCAGACATCCAAGCAGCAGCCGCTTCGGCCGCTGCTGCTTTTGGTGCTGCTAGGGATGCGATTGTTATGGCAAATAATAACAGCCAAACAAGTGGTGTGGCTTGCATGAATAGTAGTTATGATAATACAAATATGAATGGA…
MYB		At2g38300	cDNA	1023	ATGATTCCAAGTATGGAGGGAGGCGGGAAGACTAACAGAGAAGAAGAGGAGGAGGAAGAGGAAGAAGAAGAAGAAGGTGAAGAGAGTAAGGTTTCAAGCAATAGTACAGTGGAAGAGAGCGACAAGAAGACTAAGGTTAGGCCTTATGTGAGATCTAAAGTCCCTCGACTCCGGTGGACTCCTGATCTTCATCTTCGCTTTGTCCGCGCCGTTGAGAGGCTTGGAGGTCAAGAAAGAGCAACTCCAAAGTTGGTTCGTCAGATGATGAACATCAAAGGGCTTAGTATTGCTCATGTCAAGAGCCATCTACAGATGTACAGAAGCAAGAAGATAGATGATCAAGGTCAAGCTATAGCTGGTCACAAACATCTCTTCGAGACTTCCACAGATCGAAATATT…
AP2/EREBP	YES	At2g39250	cDNA	669	ATGTTGGACCTCAACCTCGGAATCTTGTCGACACACAACGAAGATGAAGATTGCAAAGTACCAACTTCCATCTTCATTCAAGAAGAAGATTCCATTAATCCCTCAAACGACAACTTGTCTTTGATTACATTTGGAATCCTTAAACGAAACGTCGAAATCCTTCCTCCTCCCCCTCCTCCTCCTCCTCCTCCTCCTCCTTCGGAAAATGAACTCTCCGGCCCCGGAAATGAGTGGTTGGATCTTTCGTCGATGCAAAGAAATAAACAAGAAACGTTGGTGATGAAGAAAAAAAGTCGACGTGGCCCAAGATCAAGAAGCTCTCATTATCGTGGCGTTACCTTTTACCGTCGAACCGGCCGTTGGGAATCTCATATTTGGGACTGTGGAAAACAAGTTTAT…
AP2/EREBP	YES	At2g40340	cDNA	1026	ATGCCGTCGGAGATTGTTGACAGGAAAAGGAAGTCTCGTGGAACACGAGATGTAGCTGAGATTCTAAGGCAATGGAGAGAGTACAATGAGCAGATTGAGGCAGAATCTTGTATCGATGGTGGTGGTCCAAAATCAATCCGAAAGCCTCCTCCAAAAGGTTCGAGGAAGGGTTGTATGAAAGGTAAAGGTGGACCTGAAAACGGGATTTGTGACTATAGAGGAGTTAGACAGAGGAGATGGGGTAAATGGGTTGCTGAGATCCGTGAGCCAGACGGAGGTGCTAGGTTGTGGCTCGGTACTTTCTCCAGTTCATATGAAGCTGCATTGGCTTATGACGAGGCGGCCAAAGCTATATATGGTCAGTCTGCCAGACTCAATCTTCCCGAGATCACAAATCGC…
AP2/EREBP		At2g40350	G	474	ATGCCCAGGAAACGGAAGTCTCGTGGAACACGAGATGTAGCTGAGATTCTAAGGAAATGGAGAGAGTACAATGAGCAGACCGAGGCAGATTCTTGCATCGATGGTGGTGGTTCAAAACCAATCCGAAAGGCTCCTCCAAAACGTTCGAGGAAGGGTTGTATGAAAGGTAAAGGTGGACCTGAAAATGGGATTTGTGACTATACAGGAGTTAGACAGAGGACATGGGGTAAATGGGTTGCTGAGATCCGTGAGCCAGGCCGAGGTGCTAAGTTATGGCTCGGTACTTTCTCTAGTTCATATGAAGCTGCATTGGCTTATGATGAGGCTTCCAAAGCTATTTACGGTCAGTCTGCCCGACTCAATCTTCCACTGCTGCCACTGTGTCAGGCTCGGTTACTG…
bZIP		At2g40620	cDNA	1104	ATGGAGGATCCTTCTAACCCACAACCAAACCAGAGCAATCTCTCGCAATGCCCGCCTTTAGCCACAGCTCCGACACCTGCGCCAGTTCGTGGTCCGTACCACCGGAGAGCACATTCGGAGGTCCAATTCCGTCTCCCTGAAGATCTGGATCTCTCTGAACCATTCGGAGGATTCGATGAGCTTGGATCCGAAGATGATCTCTTTTGCTCATACATGGACATTGAGAAACTTGGATCCGGATCCGGATCCGCATCCGATTCGGCTGGTCCTTCTGCTCCTAGGTCTGATAACCCGTTTTCCGCTGAGAATGGAGGTGCGGAGGCTGGGAATTCGAGACCTCGACACAGGCATAGCCTCTCCGTTGATGGCTCTTCGACTTTGGAGTCAATTGAGGCTAAG…
bZIP		At2g40950	U17413	2166	ATGGCTGAACCAATCACCAAGGAGCAGCCTCCTCCACCTGCTCCGGACCCTAATTCCACCTACCCTCCTCCGTCCGATTTTGATTCCATCTCGATCCCTCCGTTAGATGATCATTTCTCCGATCAGACTCCGATTGGTGAACTAATGTCCGATCTGGGGTTTCCCGATGGTGAATTCGAGCTCACTTTCGACGGTATGGACGATCTTTACTTCCCTGCTGAGAATGAGTCGTTTCTCATCCCTATCAATACGTCCAATCAAGAACAGTTTGGTGATTTCACTCCGGAGTCTGAAAGTTCTGGAATTTCCGGTGATTGTATTGTTCCCAAAGATGCAGATAAGACTATTACAACTTCCGGTTGCATTAACCGGGAATCTCCTAGAGATTCCGATGATCGT…	Forward and reverse sequences do not overlap
bHLH		At2g42280	cDNA	1080	ATGGATTCAAATAATCATCTCTACGACCCGAATCCCACCGGGTCGGGTCTTCTTCGTTTTAGATCAGCTCCGAGCTCTGTTCTCGCCGCTTTTGTTGACGACGACAAGATTGGTTTCGACTCCGATAGGTTGCTTTCAAGATTCGTGACCTCTAATGGCGTTAACGGAGATCTGGGTTCACCTAAATTCGAGGATAAGTCTCCGGTTTCGTTAACGAACACCTCTGTTTCATACGCCGCCACTCTGCCGCCACCGCCGCAGCTTGAGCCGTCGAGTTTTCTGGGTTTGCCGCCGCATTACCCGAGGCAGAGTAAAGGGATAATGAACTCGGTTGGTTTGGATCAGTTTCTCGGTATCAATAATCATCACACCAAACCAGTTGAATCTAATCTTCTCCGT…
bHLH		At2g42300	cDNA	984	ATGGATCTGACCCAAGGTTTCAGAGCTAGATCCGGCGTTGTTGGGCCGGTGGCCGGACTAGAATCTCTCAATTTCAGCGACGAATTTCGGCACTTAGTGACGACGATGCCTCCGGAGACTACTGGCGGCTCCTTCACGGCTTTACTCGAGATGCCTGTGACTCAGGCCATGGAGCTTCTCCATTTCCCAGATTCATCGTCTTCTCAGGCCAGAACCGTTACCAGTGGTGATATTTCTCCTACCACTCTTCACCCTTTCGGGGCTTTGACTTTTCCTTCTAACTCGCTTCTCTTGGACCGCGCCGCTCGTTTCTCGGTGATTGCTACAGAGCAAAACGGTAATTTTTCCGGCGAGACTGCTAACTCTTTACCTTCTAATCCCGGCGCGAATCTGGACAGA…
MYB		At2g42660	cDNA	768	ATGGCCGGGAGATCTTCGCCGGGAAAATGCTCCACGTGGCTTGACCTGAACAGAGAAGAAACAGTGGAGAAGAACAATGAAGAAGAGTCATCAGTGGAAGACGAAGACCAAATCACGAATAACGTTAGACAGTATATTCGGTCCAACATGCCTCGGCTTCGTTGGACGCCTGATCTTCATCTCTCCTTCGTTCGTGCTGTCCAACGACTAGGCGGTCCAGACAGAGCGACGCCGAAATTGGTTCTTGAGATGATGAATCTAAAAGGATTGAGTATTGCACATGTCAAGAGTCATTTACAGATGTATCGAAGTAAGAAGCTCGAGCCGTCTTCTCGCCCTGGATTTGGAGCTTTCATGAGTGGACAAAGAAGCTATTTGATGGACATGATCGACTCTCGA…	A base is missing before the ATG and after the STOP. G instead of A at 428bp downstream ATG.		G en lugar de A
bHLH		At2g43060	cDNA	471	ATGGCCTCTGCAGACAAACTCATAAACACAGATGTCCCTGAAAAGGACGTTTTTGCCTTCCACTTCCTCCAATCCCTCTCAAATCTCAGAAAACAAAACCCTTTTGATACTCCGGACCAAAAAAACTACCGCGTGAGGAAGATCAAGAAGGCTGCGTACGTTTCCATGGCCAGAGCAGCCGGAGGGAGTAGCCGGCTATGGAGCAGAGCCCTCTTGCGTAGAGCAGACAAAGATGACAACAAGATCGTAAGATTTTCAAGGAGGAAGTGGAAGATATCATCAAAACGGAGGAGGAGTAACCAGAGAGCTCCGGTGGTGGAGGAGGCGGCGGAGAGGCTGAGGAATCTTGTTCCGGGAGGCGGAGGAATGGAGACGTCAAAGCTGATGGAAGAGACGGCT…
NON-TF	YES	At2g43220	G	1617	ATGGCTAAGACGCTGGACCTCTTTTGGCACGAACATCCTTTATATGAAAAATATCGTATGTTCACTTGCCAAGAGTGCCATAGGAGTGCTATACCCTTCTTTGAAGTTTTTTATGGATGCTTCAGATGCAATATAAAATGGCATCCCTATTGCGTGCCAAGGTCAACGAAGAATATTAACCACCCTTGTCACCCGAACCATCCCCTAGAGGTTCTCCTCCAAGGGCCACCTAGTTACTCTGACGAGAAGTGCAGCCTCTGTCAACGGAAACTCTCCAACTTCGTTTACCATTGTAAGTTATGCAATTTCAGCATAGATATGGAATGCGGAAACAGGCCCCCGCCCCACAAAGTGGATCATCCAAAGTGCCACGAGCATGCACTCACCCTCATGGGAAGG…
DOF	YES	At2g46590	U25057	1074	ATGATGAACGTTAAACCAATGGAGCAGATCATGATTCCTAATAACAACACACATCAACCAAACACCACATCCAATGCAAGGCCAAACACCATTCTCACATCTAACGGCGTCTCAACTGCTGGAGCAACCGTCTCCGGCGTAAGCAACAACAATAACAATACGGCGGTTGTGGCGGAGAGGAAAGCAAGACCACAAGAGAAACTAAATTGTCCAAGATGCAACTCAACCAACACAAAGTTTTGTTACTACAACAACTATAGTCTCACACAACCAAGATACTTCTGCAAAGGTTGTCGAAGGTATTGGACCGAAGGTGGATCTCTTAGGAATGTTCCTGTGGGAGGAAGCTCAAGAAAGAACAAGAGATCATCTTCATCTTCTTCATCAAACATCCTTCAG…
		At2g46960	U12307	1560		Not a TF
AP2/EREBP		At2g47520	G	516	ATGTGTGGGGGAGCTATCATTTCTGATTTCATCTGGTCGAAATCTGAGTCAGAACCGAGTCAACTCGGCTCTGTTAGCAGCAGGAAGAAGCGTAAACCCGTCTCAGTGAGTGAAGAAAGAGATGGGAAACGAGAGAGGAAGAATCTGTACAGAGGGATAAGGCAGAGGCCATGGGGCAAATGGGCAGCGGAGATTCGTGACCCGAGCAAAGGTGTACGTGTCTGGCTTGGCACATTCAAAACCGCCGACGAAGCTGCTCGAGCCTACGACGTTGCTGCCATCAAAATCCGTGGCCGGAAAGCCAAACTGAATTTCCCAAACACTCAAGTAGAAGAAGAAGCCGATACTAAACCAGGGGGGAATCAAAATGAGCTGATTTCGGAAAACCAAGTAGAGAGC…
C3HC4	YES	At2g47700	cDNA	1077	ATGGCCGGAGCTAAAGATTCGGGTTGCGATGATGATCTCCGAATTGCTGGTGGATGTGACCCTGGAAAACGCGGGAACCCGGAGGATTCCTCGTCTCCTGTCGAAGTCTCGTGCTCGATTTGCCTCGAATCGGTGCTCGATGATGGTACCAGATCCAAGGCTAAGCTCCAATGTGGTCACCAGTTCCATTTGGATTGCATTGGATCAGCATTTAACATGAAAGGAGCCATGCAATGCCCTAACTGTCGCAATGTCGAAAAGGGTCAGTGGTTGTATGCAAACGGTTCTACTCGCCCCTTTCCAGAGTTTTCCATGGAAGATTGGATCCCTGAAGAAGACTTGTACGGTTTAAGCTATCCGGAAATGCAATATCGGGTCCATTGGTGCCCGTTTGGTGAA…
HSF		At3g02990	cDNA	1407	ATGGGAACGGTTTGCGAATCTGTAGCGACGGCGAAATCTTCGACGGCGGTGATGAGCTCCATTCCGCCTTTTCTGAGCAAAACGTACGATATGGTTGACGATCCATTGACGGACGACGTGGTGTCTTGGAGCAGCGGAAACAACAGCTTCGTGGTTTGGAACGTGCCTGAGTTCGCCAAACAGTTTCTACCAAAGTATTTCAAGCACAACAATTTCTCCAGCTTCGTCAGACAGCTCAATACTTATGGTTTTAGAAAAGTTGATCCAGACCGCTGGGAGTTTGCAAACGAGGGCTTTTTAAGAGGCCAAAAGCAAATACTAAAGAGTATTGTCCGGCGAAAACCTGCACAAGTGCAGCCTCCACAACAACCTCAAGTTCAGCACTCATCTGTGGGTGCG…
ZZ		At3g05700	U20341	672	ATGGATTCCGATTCATGGAGTGATCGTCTCGCTTCAGCTACGAGGAGATACCAGCTAGCTTTTCCATCACGATCTGATACATTCTTAGGGTTTGAAGAGATAGATGGAGAAGAAGAGTTCAGGGAAGAGTTTGCTTGCCCTTTCTGTTCTGACTATTTTGATATTGTCTCTCTCTGCTGCCACATAGATGAAGATCATCCTATGGAAGCCAAAAATGGGGTATGTCCAGTTTGTGCGGTTAGGGTGGGTGTTGACATGGTTGCTCATATAACCCTTCAGCACGCTAATATTTTCAAGATGCACCGCAAGAGAAAACCAAGAAGAGGCGGGTCATATTCCACATTATCGATCTTAAGGAGAGAGTTTCCTGATGGAAACTTTCAGAGCCTCTTTGGAGGA…
bHLH		At3g06590	U15062	666	ATGGCGTCTCTGATCTCAGATATTGAACCGCCGACGAGTACTACTTCAGATCTCGTTCGGAGAAAGAAGAGATCCTCTGCTTCATCCGCCGCATCGTCTCGTTCAAGCGCATCTTCCGTCTCCGGTGAGATTCACGCGCGATGGCGATCGGAGAAGCAACAACGGATCTACTCAGCCAAACTGTTCCAAGCGCTCCAACAAGTCCGCCTCAACTCTTCCGCCTCAACATCATCATCTCCAACGGCTCAGAAACGAGGAAAGGCCGTCCGTGAAGCCGCCGATCGAGCTCTTGCCGTTTCCGCTCGGGGAAGAACACTCTGGAGCAGAGCGATCTTAGCTAATCGGATCAAACTGAAATTTCGTAAACAGAGACGTCCTCGAGCTACGATGGCGATTCCG…
ZZ		At3g06760	cDNA	675	ATGGATTCCAATTGGATCAATTGTCCCTCTGTTTTCTCCTCATCCTCTTCTTCTTCCAGACGCTGTCAATCCCGATCAGACTTGTATTTAGGAGGAGGGTACGAGGATCTTGAAGGAGAAGACGATTTGAAGGCAGAGTTTATATGCCCTTTTTGCGCTGAAGATTTTGACATTGTTGGGCTTTGTTGTCACATTGATGAAGAACATCCTGTTGAAGCCAAGAATGGGGTCTGTCCTGTATGCACTAAGAGGGTGGGATTGGATATCGTTGGCCATATTACGACGCAACATGCGAATTTCTTTAAGGTACAGCGAAGGAGAAGGTTGCGAAGAGGAGGATATAGCTCTACCTATCTCGCCTTGAAAAAGGAACTCCGGGAAGCAAACCTACAGTCTCTT…
MYB	YES	At3g09600	U19901	928	ATGAGCTCGTCGCCGTCAAGAAATCCAACGAACGCCGAAGCACCTCCGCCACCACCAACATCGACGGATGCTGTGGCAGAGGGTTCGTCTAAGAAAGTGAGGAAACCATATACCATCACCAAGTCAAGAGAGAGCTGGACAGAGGAAGAGCACGATAAGTTTCTTGAAGCACTTCAACTGTTTGATCGTGACTGGAAGAAGATTGAAGATTTTGTTGGTTCAAAGACTGTGATTCAGATAAGGAGTCATGCTCAAAAATACTTTCTCAAGGTTCAGAAAAACGGGACATTAGCTCATGTGCCACCTCCTCGACCTAAGCGCAAAGCAGCTCATCCGTATCCTCAAAAGGCATCAAAGAACGCTCAAATGCCACTTCAAGTTTCCACGTCTTTTACTACT…	Forward and reverse sequences do not overlap
NAC		At3g10500	cDNA	1650	ATGGGTCGTGGCTCAGTAACATCGCTCGCTCCTGGGTTTCGTTTTCATCCCACAGACGAAGAACTCGTTCGTTACTATCTGAAACGAAAGATCTGCAATAAACCTTTTAAGTTCGATGCTATCTCTGTTACCGATGTATACAAATCTGAGCCTTGGGATCTCCCAGACAAGTCGAGGCTGAAAAGTAGAGACTTGGAGTGGTACTTCTTCAGTATGCTTGATAAGAAGTATAGAAATGGATCAAAGACGAATCGTGCGACTGAGATGGGATATTGGAAGACTACAGGGAAAGATCGAGAGATTCTTAATGGTTCAAAAGTCGTTGGGATGAAGAAGACTCTTGTTTATCACAAAGGTCGAGCTCCTCGTGGCGAAAGAACCAATTGGGTTATGCATGAG…	Forward and reverse sequences do not overlap
MYB		At3g11280	cDNA	792	ATGGAGACTCTGCATCCATTCTCTCACCTACCTATCTCTGACCACCGGTTCGTTGTTCAAGAGATGGTGAGCTTACACAGCTCGAGTAGCGGTAGCTGGACTAAAGAAGAGAACAAGATGTTCGAACGAGCTCTTGCGATATACGCTGAAGACTCGCCTGATCGCTGGTTTAAAGTTGCTTCCATGATCCCTGGAAAGACTGTTTTTGATGTTATGAAGCAATATAGTAAGCTTGAAGAAGACGTTTTCGATATTGAAGCAGGACGTGTTCCCATTCCTGGTTATCCTGCAGCTTCTTCTCCCTTGGGGTTTGACACGGACATGTGTCGTAAACGGCCTAGTGGAGCTAGAGGATCTGATCAAGATCGAAAGAAAGGAGTCCCTTGGACAGAGGAAGAA…
NAC		At3g12390	cDNA	612	ATGACTACCGAAGAGAAAGAGATCCTCGCCGCCAAATTGGAAGAACAGAAGATCGATCTCGATAAGCCCGAAGTTGAGGACGATGATGATAACGAAGACGATGACTCTGATGACGATGATAAGGATGATGACGAGGCTGATGGACTAGATGGAGAGGCAGGAGGTAAGTCAAAACAAAGCAGAAGTGAGAAGAAGAGTCGCAAAGCCATGCTCAAGCTTGGCATGAAACCCATCACTGGTGTTAGCCGAGTCACCGTCAAAAAGAGCAAGAATATCTTGTTTGTCATATCAAAGCCTGATGTGTTCAAGAGTCCAGCATCAGACACATATGTGATCTTTGGAGAGGCGAAGATCGAGGATTTGAGCTCTCAGATCCAGTCGCAAGCAGCAGAGCAATTC…
Trihelix		At3g14180	G	1332	ATGGAGGACGATGAAGACATCCGATCTCAGGGTTCCGATTCACCTGATCCGTCTTCCTCCCCGCCGGCGGGACGAATCACGGTTACGGTGGCTTCGGCAGGTCCGCCTTCTTATTCTCTGACTCCTCCGGGTAATTCGTCGCAGAAGGATCCGGATGCGTTGGCTCTGGCGCTGCTTCCGATTCAGGCCAGCGGTGGAGGGAATAACAGCAGTGGGAGACCAACCGGCGGCGGCGGGAGGGAGGATTGTTGGAGCGAAGCAGCTACGGCTGTGTTGATTGATGCGTGGGGTGAGAGATACTTGGAGCTTAGCAGAGGGAATCTGAAGCAGAAGCACTGGAAAGAGGTGGCTGAGATTGTGAGCAGCAGAGAGGATTACGGTAAAATTCCCAAAACTGAT…	Forward and reverse sequences do not overlap
AP2/EREBP		At3g14230	G	1128	ATGTGTGGAGGAGCTATAATCTCCGATTTCATACCTCCGCCGAGGTCCCTCCGCGTCACTAACGAGTTTATCTGGCCGGATCTGAAAAACAAAGTGAAAGCTTCAAAGAAGAGATCGAATAAGCGATCCGATTTCTTCGATCTTGACGATGATTTCGAAGCTGATTTCCAAGGGTTTAAGGATGACTCGGCTTTTGACTGCGAAGACGATGATGATGTCTTCGTCAATGTTAAGCCTTTCGTCTTCACCGCAACTACTAAGCCCGTAGCTTCCGCTTTCGTCTCCACTGGTATATATTTGGTAGGTTCAGCATATGCCAAGAAAACTGTAGAGTCCGCTGAGCAAGCTGAGAAATCTTCTAAGAGGAAGAGGAAGAATCAGTACCGAGGGATTAGGCAG…	4 aminoacids less and a base change (no aminoacid change)
AP2/EREBP	YES	At3g15210	G	669	ATGGCCAAGATGGGCTTGAAACCCGACCCGGCTACTACTAACCAGACCCACAATAATGCCAAGGAGATTCGTTACAGAGGCGTTAGGAAGCGTCCTTGGGGCCGTTATGCCGCCGAGATCCGAGATCCGGGCAAGAAAACCCGCGTCTGGCTTGGCACTTTCGATACGGCTGAAGAGGCGGCGCGTGCTTACGATACGGCGGCGCGTGATTTTCGTGGTGCTAAGGCTAAGACCAATTTCCCAACTTTTCTCGAGCTGAGTGACCAGAAGGTCCCTACCGGTTTCGCGCGTAGCCCTAGCCAGAGCAGCACGCTCGACTGTGCTTCTCCTCCGACGTTAGTTGTGCCTTCAGCGACGGCTGGGAATGTTCCCCCGCAGCTCGAGCTTAGTCTCGGCGGA…
MYB		At3g16350	U22827	1164	ATGACTCGTCGGTGTTCGCATTGTAGCAACAATGGGCACAATTCACGCACGTGTCCAACGCGTGGTGGTGGCACGTGCGGTGGAAGTGGCGGAGGAGGAGGAGGTGGTGGTGGAGGAGGGTCTGGTTCCTCCTCCGCCGTGAAGTTATTTGGTGTGAGGTTAACGGATGGCTCGATTATTAAAAAGAGTGCGAGTATGGGTAATCTCTCGGCATTGGCTGTTGCGGCGGCGGCGGCAACGCACCACCGTTTATCTCCGTCGTCTCCTCTGGCGACGTCAAATCTTAATGATTCGCCGTTATCGGATCATGCCCGATACTCTAATTTGCATCATAATGAAGGGTATTTATCTGATGATCCTGCTCATGGTTCTGGGTCTAGTCACCGTCGTGGTGAGAGG…	Forward and reverse sequences do not overlap
GATA		At3g16870	U63266	573	ATGTCTGAGGGATCAGAAGATACGAAAACAAAACTCGACTCTGCCGGAGAGTTATCAGATGTTGATAACGAGAACTGCAGTAGCAGCGGAAGTGGCGGTGGTAGTAGTTCTGGTGATACCAAAAGGACTTGCGTTGATTGCGGAACTATCCGAACTCCTCTTTGGCGTGGTGGTCCTGCCGGACCAAAGTCATTGTGCAATGCTTGTGGGATCAAGAGTAGGAAGAAGAGACAAGCAGCACTTGGTATGAGATCAGAGGAGAAGAAGAAGAACAGAAAAAGCAATTGCAATAATGATCTAAACCTCGACCATCGAAACGCCAAGAAATACAAAATCAACATAGTTGATGATGGCAAGATCGACATCGATGATGATCCGAAAATTTGCAATAACAAGCGT…
bHLH		At3g17100	cDNA	693	ATGGAGTCTATATCTCCGGTATCGAATCAGCTTCTTCAGCCGACGACGACGAGCTCTAATTCCGATCGCTCTCGTCGTAAGCGTAAGAAGAAATCATCGCCATCATCGGTTGAGAAATCTCCATCTCCGTCAATATCGTTGGAGAAATGGAGATCGGAGAAGCAGCAACAGATCTACTCAACGAAGCTAGTTCATGCTTTAAGAGAGCTACGAATCAGCCAACAACCATCTTCATCATCATCTTCTTCGATTCCACGTGGAGGTAGAGCCGTACGTGAAGTCGCCGATAGAGCTTTAGCAGTTGCGGCGAGAGGTAAAACGTTATGGAGTCGAGCGATACTTTCAAAAGCTGTAAAACTCAAATTCAGGAAACACAAACGCCAGAGAATCTCTAATCCG…
B3		At3g18960	cDNA	630	ATGGTTACAACCCAAAACACGAAGGCCAGAGTCACCTCCGTCTCTCACCGCCGATCACAGCAAGATCCTGAGTCGCCGGTGAAGAAGTTCTTCAAGTTGGTCTTACCTTCAACGATGAAGGATAAGATGATGAAGATTCCGCCAAGATTCGTGAAGCTACAAGGGTCTAAACTCTCAGAGGTTGTTACATTAGAGACTCCTGCGGGTTTCAAGCGTTCCATTAAGCTCAAACGGATCGGTGAAGAGATTTGGTTCCATGAGGGTTGGAGTGAGTTTGCAGAGGCTCATTCCATCGAGGAAGGCCACTTTCTCTTGTTCGAATACAAGGAGAATTCGAGTTTCCGTGTAATAATCTTCAATGTTTCGGCTTGCGAGACCAAATATCCACTGGATGCAGTT…
bHLH		At3g19860	cDNA	855	ATGGACGTTTCTGCTAGAAAGTCACAAAAAGCTGGGCGCGAAAAGTTGAGGAGGGAAAAACTGAATGAGCATTTTGTTGAACTGGGAAATGTACTCGATCCAGAGAGACCCAAGAATGACAAAGCCACGATTCTGACTGATACTGTTCAGTTGTTGAAAGAGCTCACATCTGAAGTCAACAAACTGAAATCTGAGTACACCGCATTGACAGATGAGTCCCGCGAGTTGACACAGGAGAAAAACGACCTGAGAGAAGAAAAGACATCGCTGAAATCAGATATAGAGAATCTCAATCTTCAATACCAGCAGAGATTAAGGTCAATGTCTCCATGGGGAGCTGCGATGGATCACACAGTCATGATGGCTCCACCACCCTCCTTTCCATACCCTATGCCTATT…	T instead of C (Y instead of H)
AP2/EREBP		At3g20310	cDNA	735	ATGAGGAAAGGGAGAGGCTCTTCCGTCGTTGGACCCGCCCTTCCAGTAACCGCCGGTGGATCTGTGAAGGAGCCGAGGTATAGAGGCGTTAGGAAGAGACCTTGGGGTCGATTCGCAGCTGAGATCCGTGATCCATTAAAAAAATCTCGTGTCTGGCTCGGTACTTTCGATTCCGCCGTAGATGCTGCACGCGCTTACGATACCGCCGCACGTAACCTCCGTGGTCCAAAGGCCAAGACCAATTTCCCGATCGATTGTTCTCCTTCTTCTCCTCTCCAACCTCTCACCTACCTCCACAATCAAAACCTCTGTTCTCCTCCGGTGATTCAGAACCAGATCGATCCGTTTATGGACCATCGGTTATACGGCGGAGGTAATTTCCAGGAGCAGCAGCAGCAG…
bHLH		At3g20640	cDNA	1365	ATGGGAGATCATCATGATTTCATCAACTCAGGAAGCTGGTGGAAAGTATCTTCTTCTTCTTCACCATCTTCTTCTTCTTCCATGAGAGCAAGCTCTATTGAATCTGGTGGTTCTGCTGTTTTCCATGATAAGCTTCATCATCATTCTTTAGCTACTGATCACCATCTTCAGATGATTGGTTTAGGACTTTCTTCACAATCACCTGTTGATCAATGGAACCAATCTCTCTTACGAGGAGATAGTAAAGCGGAGACAAGCTTTGGTGTGATGCTTCAAGAGAATCTCAATTTAGATGCCACTTCAAACGCAAACGCTAACACAACGTCATCCACATCTTCTTACCAGCTGCAAGAATCTGATTCCTCTCACCATCATCAAGCTTTGTGGCGAGATCCACAA…
DOF		At3g21270	G	615	ATGCAGGATCCAGCAGCATATTACCAGACGATGATGGCGAAGCAACAACAACAACAACAACCACAGTTTGCAGAGCAAGAACAGTTAAAGTGTCCTCGTTGTGACTCACCAAACACTAAATTCTGTTACTACAACAACTACAATCTCTCACAGCCTCGTCACTTTTGCAAAAGCTGTCGTCGTTACTGGACTAAAGGCGGCGCTCTCCGTAACGTTCCCGTCGGTGGTGGTTCTCGTAAGAACGCAACCAAACGATCCACTTCTTCTTCTTCTTCTGCTTCCTCTCCTTCCAACAGTAGCCAAAACAAGAAGACGAAAAACCCGGATCCGGATCCTGATCCACGTAATTCTCAAAAACCGGATTTGGATCCGACCCGGATGCTTTACGGGTTTCCGATC…
HSF		At3g22830	U10337	1221	ATGGATCCTTCATTTAGGTTCATTAAAGAGGAGTTTCCTGCTGGATTCAGTGATTCTCCATCACCACCATCTTCTTCTTCATACCTTTATTCATCTTCCATGGCTGAAGCAGCCATAAATGATCCAACAACATTGAGCTATCCACAACCATTAGAAGGTCTCCATGAATCAGGGCCACCTCCATTTTTGACAAAGACATATGACTTGGTGGAAGATTCAAGAACCAATCATGTCGTGTCTTGGAGCAAATCCAATAACAGCTTCATTGTCTGGGATCCACAGGCCTTTTCTGTAACTCTCCTTCCCAGATTCTTCAAGCACAATAACTTCTCCAGTTTTGTCCGCCAGCTCAACACATATGGTTTCAGAAAGGTGAATCCGGATCGGTGGGAGTTTGCA…
AP2/EREBP		At3g23230	cDNA	420	ATGGAGAGCTCAAACAGGAGCAGCAACAACCAATCACAAGATGACAAGCAAGCTCGTTTCCGGGGAGTTCGAAGAAGGCCTTGGGGAAAGTTTGCAGCAGAGATTCGAGACCCGTCGAGAAACGGTGCCCGTCTTTGGCTCGGGACATTTGAGACCGCTGAGGAGGCAGCAAGGGCTTATGACCGAGCAGCCTTTAACCTTAGGGGTCATCTCGCTATACTCAACTTCCCTAATGAGTATTATCCACGTATGGACGACTACTCGCTTCGCCCTCCTTATGCTTCTTCTTCTTCGTCGTCGTCATCGGGTTCAACTTCTACTAATGTGAGTCGACAAAACCAAAGAGAAGTTTTCGAGTTTGAGTATTTGGACGATAAGGTTCTTGAAGAACTTCTTGAT…
MYB		At3g24120	cDNA	888	ATGTACTCAGCGATTCGCTCGCTTCCACTCGATGGTGGACACGTTGGTGGTGACTACCATGGACCTCTTGACGGAACCAATCTTCCCGGTGACGCTTGTTTGGTTTTAACGACTGACCCTAAACCTCGTCTCCGGTGGACAACTGAGCTTCATGAGAGATTCGTTGACGCCGTTACTCAGCTCGGTGGTCCTGACAAAGCGACTCCCAAAACTATTATGAGAACAATGGGAGTGAAGGGTCTCACTCTCTACCACCTCAAATCACATCTTCAGAAATTCCGCCTAGGGAGGCAAGCTGGCAAAGAATCAACTGAGAACTCTAAAGATGCTTCTTGTGTAGGGGAGAGTCAGGACACAGGTTCATCTTCGACATCATCAATGAGAATGGCGCAGCAGGAG…	A T is missing from the vector just after the STOP		Volver a pedir oligo rev, y repetir
HSF		At3g24520	cDNA	993	ATGGAGGACGACAATAGTAACAACAACAACAACAACAACGTGATCGCACCTTTCATCGTGAAAACATATCAGATGGTCAATGATCCTTCCACCGATTGGCTCATCACTTGGGGACCTGCTCACAACAGTTTCATAGTCGTTGATCCACTCGACTTCTCGCAACGAATCTTACCTGCTTATTTCAAACACAACAATTTCAGCAGTTTTGTTCGTCAACTCAACACCTATGGGTTTAGGAAAGTGGATCCGGACCGGTGGGAGTTTGCGAACGAGCATTTTCTAAGGGGACAGAAGCATTTGTTGAATAACATAGCGCGTAGGAAACACGCGCGGGGGATGTACGGTCAAGATTTGGAGGACGGTGAGATTGTGAGGGAGATCGAACGGTTAAAAGAAGAG…	3 bases (AGG) missing at 124bp upstream STOP codon (1 aminoacid less compared to prediction)
bHLH		At3g25710	cDNA	1035	ATGTACGCAATGAAAGAAGAAGACTGTCTTCAAACATTTCACAACTTACAAGACTATCAAGACCAGTTTCATCTTCATCATCATCCACAAATTCTCCCCTGGTCGTCGACATCTTTACCTTCTTTTGACCCACTCCATTTCCCATCTAACCCGACCCGTTATTCTGACCCGGTTCACTACTTCAACAGAAGAGCTTCTTCTTCCTCTTCTTCTTTTGACTATAACGACGGTTTTGTCTCTCCTCCTCCTTCCATGGATCATCCTCAGAACCATCTAAGGATTTTATCCGAAGCTCTTGGACCCATCATGCGTCGTGGCTCGTCCTTTGGGTTCGATGGTGAGATCATGGGAAAATTGAGTGCACAAGAAGTCATGGATGCTAAGGCTTTAGCTGCTTCA…
AP2/EREBP	YES	At3g25730	G	1002	ATGGATGCCATGAGTAGCGTAGACGAGAGCTCTACAACTACAGATTCCATTCCGGCGAGAAAGTCATCGTCTCCGGCGAGTTTACTATATAGAATGGGAAGCGGAACAAGCGTGGTACTTGATTCAGAGAACGGTGTCGAAGTCGAAGTCGAAGCCGAATCAAGAAAGCTTCCTTCTTCAAGATTCAAAGGTGTTGTTCCTCAACCAAATGGAAGATGGGGAGCTCAGATTTACGAGAAACATCAACGCGTGTGGCTTGGTACTTTCAACGAGGAAGACGAAGCAGCTCGTGCTTACGACGTCGCGGCTCACCGTTTCCGTGGCCGCGATGCCGTTACTAATTTCAAAGACACGACGTTCGAAGAAGAGGTTGAGTTCTTAAACGCGCATTCGAAATCA…
NAC	YES	At3g29035	cDNA	957	ATGGATTACAAGGTATCAAGAAGTGGGGAGATAGTAGAAGGAGAAGTAGAAGATTCAGAAAAGATTGATTTACCACCTGGTTTCAGATTTCACCCAACTGATGAAGAACTTATAACACACTATCTAAGACCAAAGGTTGTAAACTCTTTTTTCTCTGCTATAGCTATTGGTGAAGTTGATCTCAACAAAGTCGAGCCTTGGGACTTGCCTTGGAAGGCTAAGCTTGGGGAAAAAGAGTGGTACTTCTTTTGCGTAAGAGACCGAAAATACCCGACTGGTTTAAGAACGAATCGTGCTACTAAAGCCGGTTATTGGAAAGCTACAGGGAAAGATAAAGAGATCTTCAAAGGGAAATCTCTTGTTGGTATGAAGAAAACATTGGTTTTCTACAAAGGAAGA…
TCP	YES	At3g47620	G	1470	ATGCAAAAGCCAACATCAAGTATCTTAAATGTCATAATGGACGGTGGAGACAGCGTCGGAGGAGGAGGAGGAGATGATCACCACCGTCACCTCCACCATCACCACCGCCCTACTTTCCCTTTTCAACTACTCGGAAAACACGACCCCGACGACAACCATCAACAACAACCTTCCCCTTCCTCCTCCTCCTCTCTATTTTCTCTCCATCAACACCAACAATTATCTCAATCGCAACCTCAATCGCAATCGCAAAAGTCACAACCGCAGACAACGCAAAAAGAGTTATTACAAACGCAAGAGGAATCTGCGGTGGTGGCAGCTAAAAAGCCACCGTTGAAACGAGCGTCGACGAAAGACCGACACACGAAAGTAGACGGAAGAGGGAGGAGAATAAGGATG…
bHLH		At3g47640	cDNA	723	ATGGTATCGAAAACTCCTTCTACATCGTCTGATGAAGCAAATGCTACTGCAGATGAAAGATGTAGAAAAGGTAAAGTACCGAAAAGGATCAACAAGGCCGTTCGTGAGAGGCTTAAGCGTGAGCATTTGAATGAGCTTTTCATTGAATTAGCCGATACTCTTGAACTGAATCAACAGAACAGTGGGAAAGCTTCTATACTATGCGAAGCTACTCGATTCTTGAAGGACGTGTTTGGTCAAATTGAGTCTCTTAGAAAGGAGCATGCTTCTCTCCTATCTGAATCTAGCTATGTAACCACAGAGAAGAATGAGCTCAAGGAAGAAACATCAGTGCTTGAGACTGAGATTTCGAAACTACAAAACGAGATTGAAGCTAGAGCGAATCAGTCGAAACCTGAC…
bZIP		At3g49760	cDNA	471	ATGATGTCTACTATTTCCCCGGTTTTCTCAACCGAACCGGGTCTATTAACCTCTGTCCTCCCAGCTTTTGAAACCAGTTTCACTCCATGGGACATTTCACACCTCTTCTCGGTCTTCGATTCATTAATCGATCCAAAACCGGTTTCGACCCATGACTATGGTTCAGTAAACCAGATCGGTTCAGACATGTCTCCGACCGACAATACCGACGAGCGGAAAAAGAAACGGAAATTATCGAACCGGGAATCGGCTAAGCGGTCAAGAGAGAAGAAACAAAAGCACTTGGAGGAGATGAGTATCCAGCTAAACCAACTCAAAATTCAGAACCAAGAATTGAAGAACCAGCTTCGGTACGTTTTATACCATTGTCAACGAACGAAGATGGAAAATGATCGTCTA…
MYB		At3g49850	cDNA	888	ATGGGAGCTCCAAAGCTGAAGTGGACACCAGAAGAAGAAACAGCTCTTAAAGCTGGAGTACTTAAACATGGAACTGGAAAATGGCGTACCATTCTCTCAGATCCTGTGTATAGCACAATTCTGAAGTCTCGTTCTAATGTGGATCTCAAGGACAAATGGAGAAATATAAGTGTAACAGCTTTATGGGGATCTAGGAAGAAGGCTAAGCTTGCTCTTAAAAGAACTCCTTTGTCGGGTAGTAGGCAAGACGATAACGCTACAGCTATTACCATTGTGTCTTTAGCTAATGGTGATGTAGGAGGACAACAGATTGATGCACCATCTCCTCCTGCAGGTTCTTGTGAACCTCCAAGACCTTCTACAAGTGTGGATAAGATTATATTGGAGGCTATTACCAGC…
AP2/EREBP	YES	At3g50260	G	462	ATGGACGCCGGAGTAGCAGTAAAAGCTGACGTGGCAGTCAAAATGAAGAGAGAAAGACCATTCAAAGGGATCAGAATGAGAAAATGGGGGAAATGGGTTGCGGAGATTCGAGAACCCAACAAGCGTTCAAGACTTTGGCTCGGCTCTTACTCTACTCCCGAAGCGGCGGCGCGTGCATACGACACGGCTGTCTTTTACCTCAGAGGACCAACTGCTACGCTCAACTTCCCGGAGCTTCTGCCGTGTACCTCCGCCGAGGATATGTCAGCGGCAACGATCAGGAAAAAGGCGACGGAGGTGGGAGCTCAAGTAGATGCGATAGGGGCGACGGTGGTGCAGAACAACAAACGCCGCCGCGTTTTTAGTCAAAAGCGTGACTTTGGCGGCGGGTTATTAGAG…	A instead of G (N instead of D)
bHLH		At3g50330	cDNA	696	ATGGATAACTCCGACATTCTAATGAACATGATGATGCAGCAGATGGAGAAGCTTCCTGAACACTTCTCTAACTCAAACCCTAACCCTAATCCCCATAACATTATGATGCTTTCTGAATCCAACACCCACCCGTTCTTCTTCAACCCCACTCATTCTCATCTCCCATTTGACCAAACCATGCCTCACCACCAACCCGGTTTAAATTTCCGGTACGCCCCCTCCCCGTCATCATCTCTCCCGGAGAAGAGAGGAGGCTGCAGCGACAACGCCAACATGGCGGCGATGAGAGAGATGATCTTTCGAATAGCCGTGATGCAGCCTATACATATTGATCCGGAATCCGTAAAGCCACCAAAGAGAAAGAACGTGAGGATCTCTAAGGATCCACAGAGCGTGGCA…
DOF		At3g50410	G	762	ATGCCGACGTCTGACTCCGGTGAACCACGGCGAATAGCTATGAAACCTAACGGCGTAACAGTTCCGATTTCTGACCAGCAAGAACAGCTTCCATGTCCTCGTTGTGACTCATCCAACACTAAGTTCTGTTACTACAACAACTACAACTTCTCTCAGCCTCGTCACTTCTGCAAAGCTTGTCGTCGTTACTGGACTCACGGTGGTACTCTCCGTGACGTTCCTGTCGGTGGTGGTACTCGTAAAAGCGCGAAACGTTCCCGCACTTGCTCGAACTCTTCTTCCTCCTCTGTTTCTGGTGTCGTCTCTAACTCTAACGGTGTTCCGTTACAAACGACGCCTGTTCTCTTCCCTCAGTCGTCAATCTCTAACGGCGTTACTCACACAGTAACTGAAAGCGAC…
BES1/BZR		At3g50750	cDNA	831	ATGACGGCATCAGGAGGAGGATCAACGGCGGCGACGGGGAGGATGCCGACGTGGAAGGAAAGAGAGAACAACAAGAAGAGAGAAAGAAGAAGAAGAGCAATAGCAGCTAAAATCTTCACCGGACTTAGATCTCAAGGCAATTATAAACTTCCTAAACACTGTGACAACAATGAAGTCCTCAAAGCTCTTTGTCTTGAAGCTGGTTGGATCGTTCATGAAGATGGCACCACTTATCGAAAGGGTTCTCGACCAACAGAAACAACAGTGCCGTGTTCGTCAATCCAACTTAGTCCACAATCATCGGCCTTTCAAAGCCCAATTCCTTCGTATCAAGCTAGCCCTTCATCGTCATCTTACCCAAGTCCGACCCGGTTTGACCCGAATCAATCCTCGACTTAT…
HSF		At3g51910	cDNA	414	ATGTTAAAAAAATTACAGGGTTTCAGAAAGATAGAAGCAGAGAGATGGGAATTTGCAAACGAAGAGTTTTTGTTAGGACAAAGACAGTTGTTGAAGAACATCAAGAGGAGAAACCCTTTTACTCCATCATCTTCACCAAGCCATGACGCTTGCAACGAGCTTCGCAGAGAGAAGCAAGTGCTAATGATGGAGATAGTGAGTCTAAGACAGCAGCAACAAACAACGAAAAGCTACATCAAAGCTATGGAACAGAGGATAGAAGGAACAGAGAGGAAACAGAGACAAATGATGTCGTTTCTGGCTAGAGCAATGCAGAGTCCTTCGTTTTTGCATCAGTTGTTGAAACAAAGAGATAAAAAAATTAAGGAGCTTGAGGATAATGAGTCAGCAAAGAGGATC…
bZIP		At3g51960	cDNA	684	ATGTTTTGTTGTTGCAAGGATTGCAGAGGAAACCAACGAGTTTCTAACTTTGATTCTCTAACAGGTGTTTTCTTTGGAGATCTTGAGTTTGGACCTCAGAATCAAAGATATATAAAGATGAATGAGGAAGAAGATAAAGATCAAGATCGAGTAACGAGAGGATGTAGTCACACTCATAGCTGTAACCCTCCAGGCCCAGAGGATGCTTCTCACTCCCACACATGCTTCCACGCTCACACTCATCTCATCATCTCTGATCAGCAAGAGAATGATCATTCTGACAGTAGCAACAAGAAACGGTTATGTGGTAATAGAGAGGCAGTGAGGAAGTACAGGGAGAAGAAGAAGGCTCGCACTGCATACCTTGAAGATGAAGTGATGAGATTGCAATCTCTGAAT…	Extra codon (CAG coding for Q) at about 255bp downstream of ATG.
B3		At3g53310	cDNA	861	ATGGCTGACGATAGCGAATTGTATCCTCGTTTCTTCAAAGTGTTCCTCGTTGAATCGGCTTCTGAATCGTTGATGATTCCGTTGCCTTTTATGGCATTTCTTGCTGATCCATTGCCAAAGACAGTGAAGCTCCAAGGTCTTGGAGGAAAACTTTGGACTGTGAGCTTGAAGAAAATAAGCGGAGCTGCGTATCTTACTAGAGGATGGCCAAAATTCGCAGAGGAACATGAGCTGAAGAACGGAGAGTTCATGACATTTGTGTATGATGGTCATCGTACCTTTGAAGTGAGTGTCTTTGATCGTTGGGGTAGCAAAGAGGTCAGAGCTGAAATACAAGCCATACCACTTTCTGATTCTGATTCTGATTCTGTTGTGGAAGACGAAAAAGACTCAACTGAT…
Bromodomain		At3g54610	cDNA	1707	ATGGACTCTCACTCTTCCCACCTCAACGCCGCCAATCGTTCCCGCAGTTCTCAGACTCCTTCTCCTTCTCATTCCGCCTCCGCCTCCGTCACTTCTTCTCTCCACAAACGCAAACTCGCCGCCACCACGGCAGCGAATGCAGCCGCTTCTGAAGATCACGCCCCTCCTTCTTCCTCTTTCCCTCCTTCCTCCTTCTCTGCCGATACTCGCGACGGCGCTTTAACCTCCAACGATGAACTCGAGAGCATCTCCGCTCGCGGCGCCGATACAGATTCAGATCCTGATGAATCAGAGGATATAGTCGTGGATGATGACGAGGACGAATTTGCTCCTGAACAGGACCAGGACTCTTCTATCCGCACATTCACCGCCGCTCGACTCGATTCCAGCTCTGGAGTC…
GATA	YES	At3g54810	cDNA	969	ATGATTGGAACAAGCTTCCCCGAGGATCTTGATTGTGGCAACTTCTTTGACAACATGGATGATCTCATGGACTTTCCCGGTGGAGATATCGATGTCGGTTTCGGCATAGGTGACTCCGACTCTTTCCCTACCATCTGGACCACTCATCACGACACGTGGCCTGCCGCTTCTGATCCTCTCTTCTCTTCCAACACCAACTCTGATTCATCACCTGAGCTCTATGTTCCGTTTGAGGACATTGTTAAGGTGGAAAGACCTCCAAGCTTTGTAGAGGAAACATTGGTTGAGAAGAAGGAAGATTCGTTTTCGACAAACACTGATTCATCATCTTCTCATAGCCAATTCAGGAGCTCAAGTCCAGTGTCGGTTCTCGAGAGCAGCTCCTCCTCGTCTCAAACC…	G instead of C (R instead of P) and A instead of G (T instead of A)
WRKY		At3g56400	cDNA	885	ATGGATACTAATAAAGCAAAAAAGCTTAAAGTTATGAACCAACTCGTTGAAGGCCATGACTTAACAACTCAGCTTCAGCAACTCCTCTCTCAACCCGGGTCCGGTCTAGAGGATCTAGTGGCTAAAATCTTAGTGTGTTTCAATAACACCATCTCCGTTCTTGATACCTTCGAACCCATCTCCTCCTCCTCATCCCTCGCCGCCGTTGAGGGATCTCAAAATGCTTCATGTGATAACGACGGCAAGTTTGAAGATTCCGGCGATAGTCGGAAAAGATTGGGACCCGTTAAGGGTAAAAGAGGATGCTACAAAAGAAAAAAGAGATCGGAGACGTGTACTATAGAGTCGACTATACTTGAGGACGCATTTTCTTGGAGGAAATATGGACAAAAGGAGATT…
AP2/EREBP	YES	At3g57600	G	834	ATGGAGAAATCATCCTCAATGAAACAATGGAAGAAGGGTCCTGCTCGGGGTAAAGGCGGTCCACAAAACGCTCTTTGTCAGTACCGTGGAGTCAGGCAAAGGACTTGGGGCAAATGGGTGGCTGAGATCAGAGAGCCCAAGAAGAGGGCAAGACTTTGGCTTGGCTCTTTCGCTACAGCTGAAGAAGCAGCTATGGCTTATGATGAGGCTGCCTTGAAACTCTATGGGCACGACGCATACCTCAACTTACCTCATCTTCAGCGGAATACAAGACCTTCTCTGAGTAACTCTCAGAGGTTCAAATGGGTACCTTCAAGGAAGTTTATATCTATGTTTCCTTCATGTGGTATGCTAAACGTGAATGCTCAGCCTAGTGTTCACATAATCCAGCAAAGACTA…
bHLH		At3g57800	cDNA	1140	ATGGATCTGACTGGAGGATTTGGAGCTAGATCCGGCGGTGTTGGACCGTGCCGGGAACCAATAGGCCTTGAATCGCTACATCTCGGTGACGAATTTCGGCAACTAGTGACGACTTTACCTCCCGAGAACCCCGGCGGTTCGTTCACGGCTTTGCTTGAGCTTCCACCTACACAAGCAGTGGAGCTTCTCCATTTCACTGATTCTTCGTCTTCTCAACAAGCGGCAGTGACAGGGATCGGTGGAGAGATTCCTCCGCCGCTTCACTCTTTCGGTGGGACATTGGCTTTTCCTTCTAACTCAGTTCTCATGGAGCGAGCAGCTCGTTTCTCGGTGATTGCCACTGAGCAACAAAACGGAAATATCTCCGGGGAGACTCCGACGAGCTCTGTACCTTCCAAT…
Bromodomain		At3g57980	cDNA	354	ATGGCAAAATCAGAAAACGACAAAAATTCTCCAGAGAAACAAACGTGGAGCACAATGGAGGAGCTCCTCCTCGCCTGCGCCGTTCACCGTCACGGTACTGATTCATGGGACTCCGTCGCTTCTGAAGTCCATAAACAGAACTCCACTTTTCGTACACTCACCGCCATCGACTGTCGTCACAAGTACAACGATCTCAAGCGCCGATTCTCCCGTAACCTGGTCTCGCCAGGATCTGCCGATGAAGAAACCCTCGCCGCCGAGATCTCTTCCGTTCCTTGGCTTGAGGAGTTGAGAAAGCTCCGTGTCGATGAACTCCGACGAGAAGTCGAACGTTACGATCTATCCATCTCGTAA
bZIP	YES	At3g58120	cDNA	990	ATGGCACAACTTCCTCCGAAAATCCCAACCATGACGACGCCAAATTGGCCTGACTTCTCCTCCCAGAAACTCCCTTCCATAGCCGCAACGGCGGCAGCCGCAGCAACCGCTGGACCTCAACAACAAAACCCTTCATGGATGGATGAGTTTCTCGACTTCTCAGCGACTCGCCGTGGGACTCACCGTCGTTCTATAAGCGACTCCATTGCTTTCCTTGAACCACCTTCCTCCGGCGTCGGAAACCACCACTTCGATAGGTTTGACGACGAGCAATTCATGTCCATGTTCAACGACGACGTACACAACAATAACCACAATCATCATCATCATCACAGCATCAACGGCAATGTGGGTCCCACGCGTTCATCCTCCAACACCTCCACGCCGTCCGATCATAAT…
AP2/EREBP		At3g60490	G	771	ATGGGAAAACAAATCAACATAGAGAGTAGTGCTACTCATCATCAAGACAATATTGTTTCCGTTATAACAGCCACGATATCCTCCTCCTCCGTCGTAACGTCTTCGTCAGACTCTTGGTCTACCTCCAAAAGATCGTTAGTGCAAGACAATGACTCCGGAGGGAAACGGCGGAAGAGCAACGTTAGTGATGATAACAAGAATCCGACGTCGTATAGAGGAGTGAGGATGAGGAGTTGGGGAAAATGGGTGTCGGAGATTAGAGAGCCGAGGAAGAAATCAAGAATATGGCTTGGCACTTATCCAACGGCAGAGATGGCAGCTCGTGCTCATGATGTGGCGGCTTTAGCTATTAAAGGCAACTCCGGTTTTCTTAATTTCCCTGAATTATCCGGTTTGCTT…
HD	YES	At3g61890	cDNA	708	ATGGAAGAAGGAGATTTTTTCAACTGCTGTTTCAGCGAGATTAGTAGTGGCATGACCATGAATAAGAAGAAGATGAAGAAGAGCAATAACCAAAAGAGGTTTAGCGAGGAACAGATCAAGTCACTTGAGCTTATATTTGAGTCTGAGACGAGGCTTGAGCCGAGGAAGAAGGTTCAGGTAGCTAGAGAGCTAGGGCTGCAACCAAGACAAGTGGCTATATGGTTTCAAAACAAGAGGGCTCGATGGAAAACTAAGCAACTTGAGAAAGAGTATAACACTCTTAGAGCCAATTACAACAATTTGGCTTCACAATTTGAAATCATGAAGAAAGAAAAGCAATCTCTGGTCTCTGAGCTGCAGAGACTAAACGAAGAGATGCAAAGGCCTAAAGAAGAAAAG…
B3		At3g61970	G	900	ATGAATCAAGAAGATAAAGAGAAGCCTATTGAAGAAGCTTCTTCATCAATGGAGAGAGAACACATGTTCGACAAAGTAGTAACACCAAGCGACGTTGGCAAACTAAACCGACTCGTGATCCCTAAGCAACACGCAGAGAGATACTTCCCATTAGATAACTCCACAACAAACGACAGCAACAAAGGTTTGCTTCTAAACTTCGAAGATCGAAGTGGAAACTCATGGAGGTTCCGTTACTCTTACTGGAACAGTAGTCAAAGCTATGTCATGACTAAAGGTTGGAGCCGTTTTGTCAAAGACAAGAAGCTTGATGCTGGAGACATCGTTTCTTTTCAGAGAGATTCTTGTAATAAAGACAAGCTTTACATCGATTGGAGGAGACGACCTAAGATTCCCGAT…	T instead of C (F instead of L) at 51bp upstream of STOP codon. An A is missing 22bp downstream STOP codon.
WRKY		At3g62340	AF421155 (IE Somssich)	834	ATGGAAAATGTTGGTGTTGGGATGCCGTTTTACGATTTAGGGCAAACAAGGGTTTACCCACTCTTGTCTGATTTCCACGATTTATCGGCGGAGAGGTATCCGGTAGGGTTCATGGATTTACTGGGTGTTCATCGTCATACACCCACCCATACGCCGTTGATGCATTTTCCGACCACACCTAACTCGTCCTCGAGCGAAGCTGTGAATGGAGATGACGAAGAAGAAGAAGATGGAGAAGAACAGCAGCATAAGACAAAGAAGCGGTTTAAATTCACTAAAATGAGTAGAAAGCAGACGAAGAAGAAGGTGCCAAAAGTGTCATTCATCACGAGGAGTGAGGTTCTTCATCTAGATGATGGTTATAAGTGGAGAAAATACGGTCAAAAACCTGTCAAAGAC…
MYB		At4g01280	cDNA	909	ATGGTGTCCGTAAACCCTAGACCTAAGGGTTTTCCAGTTTTCGATTCCTCGAATATGAGTTTACCAAGCTCCGATGGATTTGGTTCGATTCCGGCCACGGGACGGACCAGTACGGTGTCGTTTTCTGAGGATCCGACGACGAAGATTCGGAAGCCGTACACAATCAAGAAGTCGAGAGAGAATTGGACAGATCAAGAGCACGATAAATTTCTAGAAGCTCTTCACTTATTCGATAGGGATTGGAAGAAAATAGAAGCCTTTGTTGGATCAAAAACAGTAGTTCAGATACGAAGCCACGCTCAGAAATACTTTCTCAAAGTTCAGAAGAGTGGTGCTAACGAACATCTTCCACCTCCTCGACCTAAGAGGAAAGCGAGTCATCCTTATCCTATAAAGGCT…
bHLH		At4g01460	cDNA	948	ATGAGTGGATTGATGAGTTTTGGTGAATTAGAAGACCAATTTGGTCAGATTTCAGACACTACTATGGAAGAGAAGATACCATTTCTGCAAATGCTTCAATGCATAGAACACCCTTTTACAACAACAGAACCAAATCAGTTTCTCCAATCACTTCTCCAGATCCAAACCCTAGAATCAAAGAGCTGTCTCACCCTTGAAACAAACATCAAAAGAGATCCGGGTCAAACAGATGACCCGGAAAAGGATCCAAGAACAGAAAACGGAGCAGTAACGGTCAAAGAAAAAAGAAAACGGAAACGTACAAGAGCTCCAAAGAACAAAGACGAAGTTGAAAACCAAAGGATGACTCACATTGCCGTCGAACGTAATCGAAGACGACAAATGAACGAACACTTAAAC…
B3		At4g01580	cDNA	573	ATGGTTATTACCCGAAACATGAAGGCCAGAGCCACCTCAGTCTCTCACCGCCAATCACAGCAAGATCCTGAGTCGCCGGTGAAGAAGTTCTTCAAGTTGGTCTTACCTTCAACGATGAAGGATAAGATGATGAGGATTCCGCCAAGATTCGTAAAGCTACAAGGGTCTAAACTCTCAGAGGTTGTTACATTAGTGACTCCTGCGGGATATAAGCGTTCCATAAAGCTTAAACGGATCGGTGAAGAGATTTGGTTCCATGAGGGTTGGAGTGAGTTTGCAGAGGCTCATTCCATCGAGGAAGGCCACTTTCTCTTGTTCGAATACAAGAAGAATTCGAGTTTCCGTGTAATAATCTTCAATGCTTCGGCTTGCGAGACCAACTATCCTCTGGATGCAGTT…
MYB		At4g01980	G	909	ATGGATTCTTACAATCCATTTTCTCAAGCTTCCGGTTTTATGGACTTGTTGCACAGTCAACAAGAAAGCCACAACAATGAGACCAATCAATATGAGGTTGGATCCTCAGAAATTCCCGTTTTTGGAACTCAACGTTGTCAAGAAAGTCATGAGGAACGTTATGCTTCTAGGGTGGCCATTGCAAGAAAGAAATGGGCAGCTAAAGAGGATATAGTACTCATTAGTGCCTGGTTAAACACTAGCAAAGACCCCGTGGTCGGAAATGAGCAAAAAGCTCCAGCTTTTTGGAAGAGGATTGCTTCTTATGTTGCAGCAAATCCAGACCTTGACGGTGTTCCAAAGAGGGCGTCGGCTCAATGTAAGCAAAGATGGGCAAAGATGAATGAGCTAGTCATGAAG…	An A after the ATG is missing. Also 9 bases are different from prediction in database. As a result the ORF is a bit different and shorter. MDSYNPFSQASGFMDLLHSQQESHNNETNQYEVGSSEIPVFGTQRCQESHEERYASRVAIARKKWAAKEDIVLISAWLNTSKDPVVGNEQKAPAFWKRIASYVAANPDLDGVPKRASAQCKQRWAKMNELVMKFVGCYATTTNQKASGQTENDVMLFANELFENDMKKKFSLDHAWRLLRHDQKWLISNAPKGKGIAKRRKVRVGTQAASSQPIDLEDDDVMRRPPGVKAAKAKAKKTPTVKGEEVNSVEHLTSLWDLKE…
ZZ		At4g02200	cDNA	645	ATGGAAGAAGATTTGTTGGGCATTTGTGGGTTTGATTCGTCGAAGAAATATCGATTAGAAGAACTTGCCAAGTATCAGTCGGGTTCATGTATTGAGTTTGAAGATGATGATGAAATGGCAGTGGATTATCCATGCCCGTTTTGCTCAGATGATTATGATTTAGTTGAATTGTGTCACCATATCGATGAGGAGCATCAACTAGACGCCAACAATGGGATATGTCCGGTTTGTAGCAGACGAGTGAAGATGCATATGGTTGATCACATTACCACTCAGCATAGAGATGTCTTCAAGAGACTTTACAAGGATGAGTCATATTCAGCATTTTCTCCAGGGACTAGGAAATACTTACAGTCTCTAATCGATGAGCCGTTGTCTACTAATCATACATCTAAAAGT…	T instead of A but no aminoacid change
bHLH		At4g02590	cDNA	933	ATGGCTAGTAACAACCCTCACGACAACCTTTCTGACCAAACTCCTTCTGATGATTTCTTCGAGCAAATCCTCGGCCTTCCTAACTTCTCAGCCTCTTCTGCCGCCGGTTTATCTGGAGTTGACGGAGGATTAGGTGGTGGAGCACCGCCTATGATGCTGCAGTTGGGTTCCGGAGAAGAAGGAAGTCACATGGGTGGCTTAGGAGGAAGTGGACCAACTGGGTTTCACAATCAGATGTTTCCTTTGGGGTTAAGTCTTGATCAAGGGAAAGGACCTGGGTTTCTTAGACCTGAAGGAGGACATGGAAGTGGGAAAAGATTCTCAGATGATGTTGTTGATAATCGATGTTCTTCTATGAAACCTGTTTTCCACGGGCAGCCTATGCAACAGCCACCTCCA…
AP2/EREBP		At4g06746	cDNA	452	ATGGTGATTCAATACAAACGAAAACAAGAGTTTCCTATGGTGAAAGAAGGAATGGTCATGACCGAGAAGCCAAAGAGGAATCTCATAAGCTCTAATGAGAAGCGATACAAAGGAATAAGGATGAGGAAGTGGGGCAAGTGGGTGGCTGAGATAAGAGAGCCTAATAAACGATCACGGATCTGGCTTGGTTCATACAAAACCGCCGTTGCCGCGGCACGGGCCTACGATACCGCTGTGTTTTACTTACGTGGTCCTTCGGCGAGACTCAATTTCCCTGAAGAGGTCTTTAAGGATGGAAACGGCGGTGAAGGCTTAGGAGGAGATATGTCTCCGACGTTGATACGGAAGAAGGCGGCTGAGGTGGGAGCTAGAGTCGACGCAGAGTTGCGGTTAGAGAAT…
NAC		At4g10350	cDNA	1026	ATGGGTTCTTCGTCGAACGGAGGAGTGCCACCTGGTTTCCGGTTTCATCCGACGGACGAAGAGCTTCTCCATTACTACTTGAAGAAGAAAATCTCTTACCAAAAGTTTGAGATGGAAGTCATCAGAGAGGTTGACTTAAACAAGCTTGAGCCTTGGGATTTGCAAGAGAGATGCAAGATAGGATCAACACCACAAAACGAATGGTACTTCTTCAGCCACAAGGACAGGAAATATCCGACGGGGTCAAGGACCAACCGTGCTACTCATGCAGGGTTCTGGAAGGCGACGGGACGTGACAAGTGCATAAGGAACTCTTACAAAAAGATAGGAATGAGGAAGACACTTGTGTTCTACAAAGGTAGAGCTCCTCATGGCCAAAAGACTGATTGGATCATGCAT…
NAC		At4g10480	cDNA	639	ATGCCAGGTCCAGTTATTGAGGAAGTGAATGAGGAGGCTCTTATGGATGCCATTAAAGAGCAGATGAAGCTCCAGAAGGAGAACGATGTTGTTGTTGAGGATGTGAAAGATGGAGACGAAGACGATGATGATGTTGATGACGACGACGATGAGATTGCTGATGGAGCTGGTGAGAATGAGGCTTCCAAGCAAAGTAGAAGCGAGAAGAAAAGCCGAAAGGCGATGCTGAAACTCGGAATGAAACCTGTTACTGATGTTAGCAGAGTGACTATCAAGAGATCAAAGAATGTGTTGTTTGTCATCTCGAAGCCGGATGTGTTCAAGAGTCCGAACTCTGAGACCTATGTGATATTCGGTGAGGCTAAGATTGATGACATGAGCTCTCAGCTACAAGCACAA…
AP2/EREBP		At4g11140	cDNA	864	ATGGAGACAGAGAAGAAAGTTTCTCTCCCAAGAATCTTACGAATCTCTGTTACTGATCCTTACGCAACAGATTCGTCAAGCGACGAAGAAGAAGAAGTTGATTTTGATGCATTATCTACAAAACGACGTCGTGTTAAGAAGTACGTGAAGGAAGTGGTGCTTGATTCGGTGGTTTCTGATAAAGAGAAGCCGATGAAGAAGAAGAGAAAGAAGCGCGTTGTTACTGTTCCAGTGGTTGTTACGACGGCGACGAGGAAGTTTCGTGGAGTGAGGCAAAGACCGTGGGGAAAATGGGCGGCGGAGATTAGAGATCCGAGTAGACGTGTTAGGGTTTGGTTAGGTACTTTTGACACGGCGGAGGAAGCTGCCATTGTTTACGATAACGCAGCTATTCAGCTA…
HSF	YES	At4g11660	U24153	1134	ATGCCGGGGGAACAAACCGGAGAAACTCCGACGGTGGCCGGAGTTGGCGGCGGTGGAGCTGGTTGTAGCGCCGGGAATAGTGGTGGAAGTAGTGGATGTGGTGCTGGTGGTGGCGGTGGTGGTAGTGGTGGAGGTGGTGGCGGAGGAGGAGATTCACAGAGGTCAATTCCGACGCCGTTTTTGACGAAAACGTATCAGCTTGTGGAAGATCCGGTTTACGACGAATTGATCTCGTGGAACGAAGATGGAACCACTTTTATTGTGTGGCGACCAGCTGAATTCGCTAGAGATCTTCTTCCCAAATACTTCAAACATAATAACTTCTCGAGTTTTGTTCGTCAGCTCAATACTTACGGATTTCGAAAAGTAGTTCCAGATCGTTGGGAGTTTTCTAATGAT…
C3HC4	YES	At4g12210	G	612	ATGAATTCTCGCAAAGTGGAATTTCGCTTCACCAATCTTCAAAGGAAACTCTCTTCTCCATCACATGCAAACTCAGTCATCGTTGAGATCGATACCAAATCTGAAGAGATCTTTGTAAACCAAACAACCGATCACCAAACCCGCCGGTCCACTCCGGCTACTCTATCTTGTCTCGACACTATCAATCTCAGTAGTTCTAGTCACGACCACATCCGATCACTTCTCCGTACCCGATTCGCTAGCCACCATTGGTTGTGTGATGACCTAGCCTCAGAGATCTCAACGGCGGCTATCGACTTAGGTTTTGGACGAAACGGTTTTACCATCACCGTGGTCGTCACAGTTACTTACCGGACTGTCTCGGTAACGTCAAACAACAAGAAATCTTTGAGGATAGTT…
AP2/EREBP		At4g13620	cDNA	1167	ATGATCACACCAATACACACACAACACTCCTTAATTCTCGTATATATAAACATTTATTCTCCACCTATTTTGTCAAAATTAAGAACAGGCTTCATTCTCTGGACAAACACTCAAAAAACAAACAAAAAAAGGAACATGGAAGATCAGTTTCCTAAAATAGAAACTAGCTTCATGCACGACAAGCTCTTGTCTTCTGGAATCTACGGGTTCTTGAGTTCTTCGACGCCGCCACAACTTCTCGGTGTTCCAATATTTTTGGAAGGTATGAAATCTCCTCTTCTTCCTGCTTCTTCGACTCCGAGCTACTTTGTGTCGCCTCATGATCATGAGCTCACATCTTCTATTCATCCATCTCCGGTAGCTTCTGTTCCTTGGAACTTTCTAGAATCTTTTCCTCAG…
HSF		At4g13980	U12758	1401	ATGAACGGCGCATTAGGTAACTCCTCCGCCTCCGTTAGCGGCGGAGAAGGAGCCGGAGGACCAGCGCCTTTCTTGGTGAAAACCTACGAGATGGTCGACGATTCATCAACGGACCAGATCGTATCGTGGAGCGCTAACAACAACAGCTTCATCGTTTGGAATCATGCCGAATTTTCACGCCTCCTTCTTCCAACCTACTTCAAACACAATAACTTCTCTTCCTTCATTCGTCAGCTCAATACCTATGGGTTTAGGAAGATTGATCCAGAGAGGTGGGAGTTTTTGAATGATGATTTTATTAAGGATCAGAAGCATCTTCTCAAGAATATACATAGAAGGAAACCTATACACAGCCACAGTCATCCACCTGCTTCGTCGACTGATCAAGAAAGAGCAGTG…
GATA		At4g17570	U67775	1533	ATGGGGAAGCAAGGACCTTGCTACCACTGTGGAGTTACAAACACACCTTTGTGGAGAAATGGACCACCAGAGAAGCCGGTATTGTGCAATGCGTGTGGATCGCGTTGGAGGACAAAGGGAACACTTGTGAACTACACACCGCTTCATGCTCGTGCTGATGGTGATGAGAATGATGATCATCACAGGTTTCAAAGAATGAAGAGCATTTCTTTAGGCAATAAGAACAAAGAGATAAAGATGCTCAAGAGGAAAGCAATTCAAGAAAACATCATCATTAAAAGACCGGTCTTTGAATTCAGTTATGGTTTGAAGGCGGCTGTGATAGAGGAGGATGCTAGTAATAGATCGAGTTCCGGTTCGGCTGTATCAAACTCTGAGAGCTGTGCACAGTTTAGCAGT…	Forward and reverse sequences do not overlap
HSF		At4g17750	cDNA	1488	ATGTTTGTAAATTTCAAATACTTCTCTTTCTTTATCCGTACGAAAATGGACGGTGTTACCGGCGGAGGAACGAATATCGGCGAGGCTGTGACGGCGCCACCACCGCGGAATCCGCATCCAGCGACTTTACTTAATGCGAACTCTTTACCGCCCCCTTTCCTTAGCAAGACGTATGACATGGTGGAAGATCCGGCGACGGACGCGATTGTCTCATGGAGTCCGACGAACAATAGCTTCATTGTTTGGGATCCACCGGAGTTTTCTCGTGATCTTCTACCTAAATACTTCAAACACAACAATTTCTCCAGCTTTGTTCGCCAGTTAAACACCTATGGTTTTAGGAAAGTGGATCCAGATCGATGGGAATTTGCTAATGAAGGTTTCTTAAGAGGTCAAAAA…
G2-like	YES	At4g18020	cDNA	1608	ATGGTCATTACCGCTAACGATTTATCAAAATGGGAAAATTTTCCTAAAGGACTTAAGGTTCTTCTTCTCCTCAACGGCTGTGACAGCGACGGAGATGGCTCCTCAGCCGCCGAGACTCGATCAGAGCTCGAATCAATGGACTATATCGTTACTACATTCACCGATGAAACTGAAGCACTCTCTGCGGTTGTCAAGAACCCGGAGAGCTTCCACATTGCCATCGTCGAGGTGAATATGAGCGCTGAGAGTGAGAGTTTCAAGTTTCTTGAGGCTGCCAAAGACGTTCTTCCTACTATAATGATTTCAACCGATCATTGCATCACTACTACAATGAAATGCATAGCGCTTGGTGCAGTTGAGTTCCTACAAAAACCGCTCTCACCGGAGAAATTAAAGAAC…	Forward and reverse sequences do not overlap
DOF	YES	At4g21050	G	633	ATGGATAACTTGAATGTTTTCGCTAATGAAGACAATCAAGTGAATGGTTTGAAGCGTCCACCCCCGTCACGAGTGTGTCCAAGGTGTGATTCTGATAACACTAAGTTTTGCTTTTACAACAACTACAGTGAATCTCAACCGCGCTACTTTTGCAAAAACTGTCGTAGATATTGGACTCATGGTGGAGCTTTAAGAAACATACCAGTTGGTGGAAGTTGTCGTAAACCAAAGCGTCTGAAGGTAGATCAATCTTCGATTTCTGAGATGGTTTCTGTTGAGAACCAACCAATTAATCATCAATCTTTCAGACAAACTCAAGAAAACAATGAGTTTGTTCGATCTTTTGACGCTTCTTCTTCTGCTACTGTTACTGCCGTTCCGAACCATTTTGGTTATCTA…
AP2/EREBP	YES	At4g23750	G	1032	ATGGAAGCGGAGAAGAAAATGGTTCTACCGAGAATCAAATTCACAGAGCACAAAACCAACACGACAACAATCGTATCGGAGTTAACCAACACTCACCAAACCAGGATTCTTCGTATCTCAGTCACTGACCCAGACGCTACTGATTCCTCCAGTGACGACGAAGAAGAAGAACATCAACGCTTTGTCTCTAAACGCCGTCGTGTTAAGAAGTTTGTCAACGAAGTCTATCTCGATTCCGGTGCTGTTGTTACTGGTAGTTGTGGTCAAATGGAGTCGAAGAAGAGACAAAAGAGAGCGGTTAAATCGGAGTCTACTGTTTCTCCGGTTGTTTCAGCGACGACGACTACGACGGGAGAGAAGAAGTTCCGAGGAGTGAGACAGCGTCCATGGGGAAAATGG…
DOF	YES	At4g24060	U12696	615	ATGGATACGGCTCAGTGGCCACAGGAGATTGTAGTGAAGCCCTTGGAAGAAATAGTAACAAACACATGCCCAAAGCCGCAACCGCAACCGCTTCAACCGCAGCAGCCACCGTCGGTGGGTGGAGAGAGGAAGGCAAGGCCAGAAAAGGATCAAGCTGTAAACTGTCCGAGATGTAACTCAACCAACACAAAGTTTTGTTACTACAACAATTATAGTTTGACGCAGCCAAGATACTTCTGCAAAGGTTGTAGAAGGTATTGGACCGAAGGCGGTTCGCTTAGGAACATTCCTGTTGGCGGTGGCTCAAGAAAGAACAAGAGATCTCACTCTTCTTCTTCTGATATTAGTAACAATCACTCGGATTCTACACAACCAGCTACAAAGAAGCATCTCTCTGAT…	Forward and reverse sequences do not overlap
MADS	YES	At4g24540	U83875	663	ATGGCGAGAGAGAAGATAAGGATAAAGAAGATTGATAACATAACAGCGAGACAAGTTACTTTCTCAAAGAGAAGAAGAGGAATCTTCAAGAAAGCCGATGAACTTTCAGTTCTTTGCGATGCTGATGTTGCTCTCATCATCTTCTCTGCCACCGGAAAGCTCTTCGAGTTCTCCAGCTCAAGAATGAGAGACATATTGGGAAGGTATAGTCTTCATGCAAGTAACATCAACAAATTGATGGATCCACCTTCTACTCATCTCCGGCTTGAGAATTGTAACCTCTCCAGACTAAGTAAGGAAGTCGAAGACAAAACCAAGCAGCTACGGAAACTGAGAGGAGAGGATCTTGATGGATTGAACTTAGAAGAGTTGCAGCGGCTGGAGAAACTACTTGAATCC…
bHLH		At4g25400	cDNA	492	ATGGAGAAGTTAGTACATAAAGAAATTGAGAAACGAAGGAGACAAGAAATGGCTTCTCTCTACGCGTCTCTCCGCTCTCTTCTCCCTTTAGAGTTCATCCAGGGAAAACGTTCAACGTCAGATCAGGTGAAAGGGGCAGTGAATTACATAGACTATTTGCAAAGGAATATCAAAGACATAAATTCCAAGAGAGATGACCTCGTGTTATTGTCTGGACGAAGCTTTAGGAGTAGTAATGAACAAGAATGGAATGAGATTTCGAATCATGTCGTGATTCGTCCGTGTTTGGTCGGCATAGAGATAGTGTTGAGCATTCTCCAAACGCCATTCTCAAGCGTTCTGCAAGTGCTTCGTGAACACGGTCTCTATGTTCTTGGCTACATCTGTTCCAGTGTAAAT…
AP2/EREBP		At4g25470	G	651	ATGAACTCATTTTCTGCCTTTTCTGAAATGTTTGGCTCCGATTACGAGTCTCCGGTTTCCTCAGGCGGTGATTACAGTCCGAAGCTTGCCACGAGCTGCCCCAAGAAACCAGCGGGAAGGAAGAAGTTTCGTGAGACTCGTCACCCAATTTACAGAGGAGTTCGTCAAAGAAACTCCGGTAAGTGGGTGTGTGAGTTGAGAGAGCCAAACAAGAAAACGAGGATTTGGCTCGGGACTTTCCAAACCGCTGAGATGGCAGCTCGTGCTCACGACGTCGCCGCCATAGCTCTCCGTGGCAGATCTGCCTGTCTCAATTTCGCTGACTCGGCTTGGCGGCTACGAATCCCGGAATCAACCTGTGCCAAGGAAATCCAAAAGGCGGCGGCTGAAGCCGCGTTG…
AP2/EREBP		At4g25480	cDNA	651	ATGAACTCATTTTCTGCTTTTTCTGAAATGTTTGGCTCCGATTACGAGTCTTCGGTTTCCTCAGGCGGTGATTATATTCCGACGCTTGCGAGCAGCTGCCCCAAGAAACCGGCGGGTCGTAAGAAGTTTCGTGAGACTCGTCACCCAATATACAGAGGAGTTCGTCGGAGAAACTCCGGTAAGTGGGTTTGTGAGGTTAGAGAACCAAACAAGAAAACAAGGATTTGGCTCGGAACATTTCAAACCGCTGAGATGGCAGCTCGAGCTCACGACGTTGCCGCTTTAGCCCTTCGTGGCCGATCAGCCTGTCTCAATTTCGCTGACTCGGCTTGGAGACTCCGAATCCCGGAATCAACTTGCGCTAAGGACATCCAAAAGGCGGCGGCTGAAGCTGCGTTG…
AP2/EREBP		At4g25490	G	642	ATGAACTCATTTTCAGCTTTTTCTGAAATGTTTGGCTCCGATTACGAGCCTCAAGGCGGAGATTATTGTCCGACGTTGGCCACGAGTTGTCCGAAGAAACCGGCGGGCCGTAAGAAGTTTCGTGAGACTCGTCACCCAATTTACAGAGGAGTTCGTCAAAGAAACTCCGGTAAGTGGGTTTCTGAAGTGAGAGAGCCAAACAAGAAAACCAGGATTTGGCTCGGGACTTTCCAAACCGCTGAGATGGCAGCTCGTGCTCACGACGTCGCTGCATTAGCCCTCCGTGGCCGATCAGCATGTCTCAACTTCGCTGACTCGGCTTGGCGGCTACGAATCCCGGAGTCAACATGCGCCAAGGATATCCAAAAAGCGGCTGCTGAAGCGGCGTTGGCTTTTCAA…
AP2/EREBP		At4g27950	cDNA	1008	ATGATGATGGATGAGTTTATGGATCTTAGACCAGTGAAGTACACAGAGCACAAGACTGTTATCAGAAAGTACACTAAAAAGTCGTCTATGGAGAGGAAGACCAGTGTTCGTGACTCGGCCAGGTTGGTTCGGGTCTCAATGACGGATCGTGACGCCACTGATTCATCAAGCGACGAGGAAGAGTTTCTGTTCCCTCGAAGACGTGTCAAGAGATTGATTAACGAGATCAGAGTCGAGCCTAGCAGCTCTTCCACCGGCGACGTCTCTGCTTCTCCGACGAAGGACCGGAAAAGAATCAACGTTGATTCTACGGTTCAAAAGCCCTCTGTTTCCGGCCAAAACCAGAAGAAGTACCGCGGCGTGAGACAGCGACCATGGGGAAAATGGGCGGCGGAGATT…
AP2/EREBP		At4g28140	G	879	ATGGACTTTGACGAGGAGCTAAATCTTTGTATTACGAAAGGTAAAAATGTTGATCATTCTTTTGGAGGAGAAGCTTCTTCCACGTCCCCAAGATCTATGAAGAAAATGAAGAGTCCTAGTCGTCCTAAACCCTATTTCCAATCCTCTTCTTCTCCTTATTCGTTAGAGGCTTTCCCTTTTTCTCTCGATCCAACACTTCAGAATCAGCAACAACAACTCGGATCATACGTTCCGGTACTTGAGCAACGACAAGACCCGACAATGCAAGGCCAGAAGCAAATGATCTCCTTTAGTCCTCAACAACAACAACAGCAGCAGCAGTATATGGCCCAGTACTGGAGTGACACATTGAATCTGAGTCCAAGAGGAAGAATGATGATGATGATGAGCCAAGAAGCT…
bHLH		At4g29930	U23478	765	ATGGAAGATCTCGACCATGAGTACAAGAATTACTGGGAAACCACAATGTTCTTCCAGAATCAAGAACTCGAATTTGACAGTTGGCCGATGGAGGAAGCGTTTTCGGGTTCCGGCGAGTCGAGTTCGCCAGACGGAGCGGCAACGTCGCCGGCTTCTTCGAAGAACGTTGTCTCCGAGAGAAACAGACGGCAAAAGCTTAATCAGAGACTTTTTGCTCTCCGGTCAGTTGTTCCCAATATAAGCAAGTTGGACAAGGCATCTGTCATCAAAGATTCTATCGACTATATGCAAGAACTTATTGATCAAGAGAAGACTCTAGAAGCAGAGATCAGAGAGCTAGAATCACGGTCAACATTGCTAGAAAATCCGGTAAGAGATTACGATTGCAATTTTGCGGAA…
bHLH		At4g30180	cDNA	477	ATGGAGAGGCAAATCATAAACAGGAAGAAACGAGTGTTTTCTCTTGAACCAAACAAGAACCCTAGTGCAGTTTTCACGAGAAAATACACAAGCCACTTGGTTCCTGCACTCAAGAAGCTCAACATGAACAAGAACTCTTCAAAACAAACCGTGAAGCATGAAGTAGATATGGCTTTGGCTTTGTCTGCTCAAGAATTTGCATGGAGCCGTTTCTTGCTGCAGAAGCTATCGTCCTCATCGAATCCAACCACTACCACTAGTTCTTCTTCCGATGGAATTCGGATTCTTGAAAGACCCGATAAAGAAGGCGGAAACGAAGAAGGAGGGATAGAGGAGAGACTGAGGGAATTGAAGAAGCTTTTGCCAGGTGGGGAAGAGATGAATGTGGAAGAAATGTTG…
bHLH		At4g30410	cDNA	543	ATGCAGCCTACGAGCTCAATGAATGAAGAATTCCTAAAGAAATGGCAAATGGGTCTTCAAATATTCCGTCCTTCGATAGACAACACGAGCGTCCACGAGAGAAAAAAAGCAATAAAGCTCTCTGCAGACGTTGCAATGGCGTCTCTAAGAAAAGGAACAACTTGTTGGAGCCGAGCCCTAATCGAGAAAACCGCCACCGAGGACAATTTCCTCGTACGTCAGATGCTTTCCGGCATCAAAGCGGAAACGTTAATCAACAAGAAGTTGCCTAAGAAGACTGTGTGTCATAGGAAGATCGTGAGGCGAAGCAAGAAGATCTTGAGGAGGAAATCGAAATCAGCGAGCGAAGAGGCTGCAGCAAAAGCTAAGAGACTCGTCAAGAGACGGACTCAAGGATTA…
WRKY		At4g30935	U20909	1401	ATGGAAGAAGACACTGGTATCGACGAAGCTAAGACATACACGGTGGAGAAGAGCGAGAAAGTGGAGCCGGAGAAGGACGGACTGAGTCAATTCAGAGACGAGGAAAAATCACTTGGTGCGGATATGGAAGATTTACATGATGAGACTGTGCGAGAAACCCTAGGCAAGGATCAGGTTCAAGGTGTTCGAGAAAATTCCTCTGTGGAACCAAATGTTGAAGATGTATTAGAAGTGAATGAGACTGATAGCGTCAAGGAAACTGTTGTAAGTGCGATTGTGCCGGTTGATGAAGTGGAAGAGAATCGTCAGGTAGAAACATCTCCTTCTCTGGCTGCATCGTCAGACTCATTGACAGTGACGCCATGTCTATCTTTGGATCCTGCAACTGCTTCAACCGCA…
AP2/EREBP		At4g31060	G	564	ATGCCACCCTCTCCTCCTAAATCTCCTTTTATTAGCTCTTCACTCAAAGGAGCTCATGAAGATCGCAAATTTAAATGCTATAGGGGTGTCCGAAAGAGGTCTTGGGGCAAATGGGTGTCTGAAATCAGAGTTCCAAAGACTGGACGACGAATATGGCTAGGTTCATACGATGCTCCAGAGAAGGCAGCTAGAGCCTATGATGCTGCTTTGTTCTGTATTAGGGGTGAGAAGGGAGTTTACAATTTTCCCACTGATAAAAAGCCGCAGCTTCCAGAAGGTTCTGTCCGGCCTCTGTCCAAGCTCGACATACAGACAATAGCAACAAACTATGCTTCATCAGTTGTGCATGTACCTTCCCATGCCACCACACTCCCGGCAACAACCCAGGTTCCCTCTGAA…
Trihelix		At4g31270	cDNA	885	ATGGAGGAAGGAACTTCAGGTTCACGGAGAACACGGTCTCAAGTTGCTCCAGAATGGGCAGTCAAAGATTGTCTAGTCCTCGTGAATGAGATCGCTGCGGTTGAAGCCGATTGTTCGAATGCTTTATCTAGCTTCCAGAAATGGACAATGATCACAGAGAACTGCAACGCTTTGGATGTTAGCAGAAATCTAAACCAATGCAGGAGGAAATGGGATTCTTTGATGTCTGATTACAATCAGATCAAGAAGTGGGAATCTCAGTACCGAGGCACTGGTCGTTCCTATTGGTCCCTGAGTAGTGACAAGAGGAAGTTACTTAATCTCCCGGGGGATATCGATATCGAGCTTTTTGAAGCCATCAATGCGGTTGTGATGATCCAAGATGAAAAAGCTGGGACT…
B3	YES	At4g31610	U20619	1585	ATGGCGGATCCACCACATTTCTCTCTGTTTCAGCAAAAATTTCGTACCGGAGACAAACCATTTCTCACTCTTGATGCTGACTTCTTAATGAATCACACGAAAGTGTTACTAAAATCGGATGCTTCAGACAAAGTTTGGAAAGTGAAACTGGACGGCGGTAGGCTCTCCGAAGGCTGGGAAGAGTTCGCCTGCGACCAGAAATTCAGAGACGGTGACGTTTTGGTTTTCAAACATCATGGAGACGAGGTCTTTCATGTAGCTGTGGTGTCCCCATCTGTTTCCGGCGACATACGTAACGCATCTTCTAGCCAAGTTATTACGGAAGATACTTATATTGATGTTGACGATGTTGATGATGATGATTATGGACAAGACGACGAAGATGATGATGATGATGAT…	Forward and reverse sequences do not overlap
B3		At4g31620	cDNA	1479	ATGGCGAATCATCCACTATCTTCTTCTCGATCCAACCGACCTTTTTTCGTCAGATCACTTGCTGGACACACCTCAAATCTAATAATTCCTGATGAGTTTTTCACTGCTCACTTAGAGGGTAAAACTGGCTTAACGAAATTGAAACTGACTTCTGATGCTTCGGATAGAATCTGGGATGTGAGACTGAACGGCCGGAGATTCGCCGGCGGCTGGGATGATTTCTCCGCCGCACACTGTCTTCGAGACGACGACGTTTTGGTTTTCAGACTCGACGTGAAGATGGTTTTCCACGTCACACCTTCCGGACGCAGTTTCTCACAGATACGTACATCTTCTAGCTCCGGCGACTACGACAGTGATGATGATGATGATGAAGCAGGGGACGATGATTCAGATTCG…	6 extra bases (2 extra aminoacids) at about 300bp upstream STOP codon
WRKY		At4g31805	cDNA	1035	ATGGAAGGCTCGCGGCGGAGGAGGGGAGATGGGTGCACTATCGTGCAGTGTTATACTCCTAGGAGATTCGTGGGCCGGTGGCTTTCGGGGTTGAGAAGTTCCAAGGGGAAGAGAGATGCAGGGGAGGAACAAGAAGATGACACCAGAAGGTATCAATTAGCGCCTATAAGGTGTTCGACGAGTTTAAATCAGCTGGTAATGCAGGACAATAAGCAGAACTGCCGCCTGAATAAGAGTAAAGAGCCGGAGACTAATACATTTGAGTCACAAAGCAGAGAGTCACCTTTGGAAGTGGGAATTGGTTCTTTTTTGCTCTATCTTGTTGTTGCAAGTAAAACCGAGCTTGATAAGATGACAAACCTGCGAATGCAAATGGAGATGTTTCTTCTTAATGCAAAA…	T instead of C but no aminoacid change
AP2/EREBP		At4g32800	cDNA	666	ATGGCGGATTCGTCTTCCGACAAGGAGAAGAAGGAAAATAATAAGCAGCCCGTGTATCGTGGAGTCCGTATGAGGAGCTGGGGAAAATGGGTATCGGAGATTCGCGAACCGAGGAAGAAATCGAGAATCTGGCTCGGGACTTTTCCGACGGCGGAGATGGCTATGCGTGCTCACGACGTGGCGGCTATGAGTATCAAAGGAACTTCAGCCATTCTCAATTTCCCTGAGCTCTCTAAACTTCTTCCCCGACCCGTTTCGCTCAGCCCTCGTGACGTCAGAGCTGCGGCGACCAAAGCTGCTCTCATGGACTTCGATACGACGGCGTTTCGTTCGGATACTGAGACTAGCGAAACGACGACGTCGAATAAAATGTCAGAGAGTAGTGAGAGTAACGAAACG…
HD	YES	At4g32980	U18486	1422	ATGGACAACAACAACAACAACAACACTTTTAGTTCTCTGGATAATGTCATGACTAACCAAAATCCTCTTCTCATGGATTTTATACCTTCAAGAGAAGATTCAACTTCATTCTCAACAATGCTTCCATGGAATACCATCAGATCAGATCCTCTACAAATGGGTGGCTTTGATATTTTCAATTCTATGCTGACTAACAAATACTTATCATCTTCTCCACGGTCTATCGATGTTCAAGATAACCGCAATGTTGAGTTCATGGCTCCTCCTCCTCATCCTCCTCCACTTCATCCTTTGGATCATTTAAGACACTATGATGATTCCTCAAACAACATGTGGGGTTTTGAAGCAAATAGTGAGTTTCAGGCATTTTCAGGTGTAGTTGGTCCAAGTGAACCAATG…
bHLH		At4g33880	cDNA	1059	ATGGAAGCCATGGGAGAATGGAGCAACAACCTCGGAGGAATGTACACTTATGCAACCGAGGAAGCCGATTTCATGAACCAGCTTCTCGCCTCTTATGATCATCCTGGCACCGGCTCATCCTCCGGCGCAGCAGCCAGTGGTGACCACCAAGGCTTGTATTGGAACCTTGGTTCTCATCACAACCACCTTAGCCTCGTGTCTGAAGCCGGTAGCTTCTGTTTCTCTCAAGAGAGCAGCAGCTACAGCGCTGGGAACAGCGGATATTACACCGTTGTTCCACCCACGGTTGAAGAGAACCAAAATGAGACAATGGACTTTGGGATGGAAGATGTGACCATCAATACAAACTCATACCTTGTTGGTGAGGAGACAAGTGAGTGTGACGTTGAGAAATACTCT…
AP2/EREBP	YES	At4g34410	G	807	ATGCATTATCCTAACAACAGAACCGAATTCGTCGGAGCTCCAGCCCCAACCCGGTATCAAAAGGAGCAGTTGTCACCGGAGCAAGAGCTTTCAGTTATTGTCTCTGCTTTGCAACACGTGATCTCAGGGGAAAACGAAACGGCGCCGTGTCAGGGTTTTTCCAGTGACAGCACAGTGATAAGCGCGGGAATGCCTCGGTTGGATTCAGACACTTGTCAAGTCTGTAGGATCGAAGGATGTCTCGGCTGTAACTACTTTTTCGCGCCAAATCAGAGAATTGAAAAGAATCATCAACAAGAAGAAGAGATTACTAGTAGTAGTAACAGAAGAAGAGAGAGCTCTCCCGTGGCGAAGAAAGCGGAAGGTGGCGGGAAAATCAGGAAGAGGAAGAACAAGAAG…
bHLH		At4g34530	cDNA	1008	ATGAATGGAGCTATAGGAGGTGACCTTTTGCTCAATTTTCCTGACATGTCGGTCCTAGAGCGCCAAAGGGCTCACCTCAAGTACCTCAATCCCACCTTTGATTCTCCTCTCGCCGGCTTCTTTGCCGATTCTTCAATGATTACCGGCGGCGAGATGGACAGCTATCTTTCGACTGCCGGTTTGAATCTTCCGATGATGTACGGTGAGACGACGGTGGAAGGTGATTCAAGACTCTCAATTTCGCCGGAAACGACGCTTGGGACTGGAAATTTCAAGAAACGGAAGTTTGATACAGAGACTAAGGATTGTAATGAGAAGAAGAAGAAGATGACGATGAACAGAGATGACCTAGTAGAAGAAGGAGAAGAAGAGAAGTCGAAAATAACAGAGCAAAACAAT…
bZIP	YES	At4g34590	G	480	ATGGAATCGTCGTCGTCGGGAACAACTTCGTCGACGATTCAAACGTCGTCAGGATCGGAGGAGAGTCTCATGGAGCAGAGGAAACGTAAACGGATGCTCTCAAACCGTGAATCTGCAAGGAGATCAAGAATGAAGAAACAAAAGCTCCTAGACGATCTAACGGCTCAGGTTAATCATCTGAAAAAAGAGAACACGGAGATCGTGACAAGTGTCAGCATCACAACGCAACACTACCTAACCGTTGAAGCAGAGAACTCTGTTCTCAGAGCTCAGCTTGATGAACTTAACCACAGGCTCCAATCTCTCAACGACATCATCGAGTTCCTCGACAGTAGCAACAACAACAACAACAACAACATGGGCATGTGTTCGAACCCTCTGGTTGGTTTGGAGTGTGAT…
bHLH		At4g36540	cDNA	915	ATGGACTTGTCTGTACTTGATAGGCTTAAGTGGCTGCAACAGCAACAAATGGTTTCACCTGAGTTTCTTCAGATACTTGGCTCAGATGGGAGAGAAGAGCTCAAAAGAGTTGAGAGTTACTTGGGAAACAACAATGATGAGCTGCAGAGTTTCAGACATTTTCCCGAATTCGGACCGGATTATGATACTACTGATGGCTGCATTTCTAGGACAAGTAGCTTCCATATGGAGCCAGTGAAGAATAATGGACACAGCAGAGCCATTACCTTGCAGAACAAGAGAAAACCAGAGGGTAAGACAGAAAAGAGAGAGAAGAAGAAGATCAAAGCAGAGGATGAAACAGAGCCAAGCATGAAAGGGAAATCAAACATGAGTAACACAGAGACATCTTCAGAAATT…
BES1/BZR		At4g36780	cDNA	957	ATGGCCGCCGGAGGAGGAGGAGGAGGAGGAGGATCATCGTCGGGACGTACTCCGACGTGGAAAGAGAGAGAGAACAATAAGAAGAGAGAAAGAAGAAGAAGAGCCATCACTGCTAAGATTTACTCTGGTCTTAGAGCTCAAGGTAACTATAAGCTTCCTAAGCACTGCGATAACAACGAGGTTCTTAAAGCTCTCTGTCTCGAAGCTGGTTGGATCGTCGAAGACGATGGCACCACTTATCGCAAGGGGTTTAAGCCACCAGCATCAGATATTTCAGGAACTCCTACAAACTTCAGCACAAATTCATCAATCCAACCAAGTCCACAATCATCAGCTTTTCCAAGTCCTGCACCTTCGTACCACGGAAGTCCAGTCTCATCATCCTTCCCGAGTCCATCT…
HSF	YES	At4g36990	U16604	994	ATGACGGCTGTGACGGCGGCGCAAAGATCAGTTCCGGCGCCGTTTTTAAGCAAAACGTATCAGCTAGTTGATGATCATAGCACAGACGACGTCGTTTCATGGAACGAAGAAGGAACAGCTTTTGTCGTGTGGAAAACAGCAGAGTTTGCTAAAGATCTTCTTCCTCAATACTTCAAGCATAATAATTTCTCAAGCTTCATTCGTCAGCTCAACACTTACGGATTTCGTAAAACTGTACCGGATAAATGGGAATTTGCAAACGATTATTTCCGGAGAGGCGGGGAGGATCTGTTGACGGACATACGACGGCGTAAATCGGTGATTGCTTCAACGGCGGGGAAATGTGTTGTTGTTGGTTCGCCTTCTGAGTCTAATTCTGGTGGTGGTGATGATCACGGT…
AP2/EREBP	YES	At4g37750	U11873	1668	ATGAAGTCTTTTTGTGATAATGATGATAATAATCATAGCAACACGACTAATTTGTTAGGGTTCTCATTGTCTTCAAATATGATGAAAATGGGAGGTAGAGGAGGTAGAGAAGCTATTTACTCATCTTCAACTTCTTCAGCTGCAACTTCTTCTTCTTCTGTTCCACCTCAACTTGTTGTTGGTGACAACACTAGCAACTTTGGTGTTTGCTATGGATCTAACCCAAATGGAGGAATCTATTCTCACATGTCTGTGATGCCACTCAGATCTGATGGTTCTCTTTGCTTAATGGAAGCTCTCAACAGATCTTCTCACTCGAATCACCATCAAGATTCATCTCCAAAGGTGGAGGATTTCTTTGGGACCCATCACAACAACACAAGTCACAAAGAAGCCATG…
C3HC4	YES	At4g38140	G	438	ATGATTTCAATGTTGTTTCCGCGGTCGCCTTTGTGCACAGCAGCCATAGTATTCTACACATGTGTGTGCATTCCCTTGGGGAGGTTGAAGAAGAATGGTGGAGATGCGGATGCGCATGATGATGACGGTTACAACCTAGTGGGAGTGATGTTTGGGGACAAGGAAAAGGAGGAGGAAATTTGCTGCCCCATATGCCTGGTGGAGTTTGAGGCTGAGGATGCGGTGACCCATCTTCCCAGATGCGCTCATCTCTTCCATATCAATTGCATAGAACCTTGGCTTCTCCGTGGCCACCTCACTTGCCCTCTCTGCAGATCATTTGTATTGGCTCCAACTCCTCCTACACAAAATGTCAATAATGCACACTCCTCTTCCACCTTGTATCTCTCTATCTTCTTC…
bZIP	YES	At4g38900	C104772	1644	ATGGGTGATACAGAGAAGTGTAACAGTGATATGATCCAGAGACTTCATTCATCTTTCGGCACTACTTCTTCTTCCATTCCCAAAAATCCCATTTCTCAGCTCGATTTAAACCCTAATTTCATCCGCTCATCAGCTCCTCAATTCTCCAAGCCTTTCAGTGACAGTGGCAAACGAATCGGTGTTCCTCCGTCGCACCCCAACTTAATCCCACCGACTTCTCCGTTTTCTCAGATCCCGACCACCCGACAACCCGGTTCGCATAATTTTAACCCGGGAGGAGCTAATCATTCACGGTCAATGTCACAGCCCAACTCTTTCTTCTCTTTTGACTCCTTACCTCCGTTAAGCCCTTCTCCGTTTCGAGATCACGATGTTTCAATGGAGGATAGAGATTCCGGC…
MYB		At4g39250	G	294	ATGGCATCAAGCTCAATGTCTTCTCAGAGCTCTGGCTCGTGGACTGCTAAGCAGAACAAAGCCTTTGAGCAGGCTCTAGCAACCTATGACCAGGACACTCCTAACCGTTGGCAAAATGTTGCCAAAGTCGTGGGTGGAAAAACAACAGAGGAGGTAAAGAGACACTACGAACTCTTAGTGCAAGACATCAACAGCATAGAGAACGGTCATGTTCCATTCCCAAACTACAGGACTAGTGGAGGCTGCACTAATGGCAGGCTTAGTCAGGAGGAAAAAAGGTATGTATTGTCCTAA
ERF		At4g39780	cDNA	810	ATGGCAGCCATAGATATGTTCAATAGCAACACAGATCCTTTTCAAGAAGAGCTCATGAAAGCACTTCAACCTTATACCACCAACACTGATTCTTCTTCTCCTACGTATTCAAACACAGTCTTCGGTTTCAATCAAACCACATCTCTCGGTCTAAACCAGCTCACACCTTACCAAATCCACCAAATCCAAAACCAGCTTAACCAGAGACGTAACATAATCTCTCCAAATCTAGCCCCAAAGCCTGTCCCAATGAAGAACATGACCGCTCAGAAACTCTATAGAGGAGTTAGACAAAGGCACTGGGGAAAATGGGTAGCTGAGATCCGTTTACCCAAGAACCGGACCCGACTCTGGCTTGGAACTTTCGACACAGCTGAAGAAGCAGCCATGGCTTATGAC…
DOF	YES	At5g02460	U67204	996	ATGGTTTTTTCTTCATTTCCTACTTATCCTGATCATTCATCAAACTGGCAACAACAACATCAACCAATCACAACCACCGTTGGATTCACGGGAAATAACATCAACCAACAGTTTCTTCCTCACCATCCCCTCCCACCGCAACAGCAACAAACGCCTCCGCAGCTTCACCACAACAACGGTAACGGCGGAGTCGCTGTTCCCGGTGGACCTGGCGGGTTAATCCGACCAGGTTCGATGGCGGAAAGAGCAAGGCTAGCCAACATACCATTACCTGAAACAGCCTTGAAGTGTCCAAGATGTGACTCAACTAACACCAAATTCTGTTACTTCAACAACTACAGTCTCACTCAACCTCGCCACTTCTGCAAAGCATGCCGTCGTTACTGGACACGTGGCGGT…	Forward and reverse sequences do not overlap
MYB		At5g02840	cDNA	882	ATGACCTCAACCAATCCGGTGGTCGCCGAAGTAATACCGGCGGAAACTTCTACAGATGCTACAGAGACGACGATTGCAACGACGGAAGCTGGTGAAGCACCGGAGAAGAAGGTGAGGAAAGCTTACACAATCACCAAGTCTAGAGAGAGTTGGACTGAAGGAGAACACGACAAGTTTCTGGAAGCTCTTCAATTGTTTGATCGTGACTGGAAAAAGATAGAAGATTTTGTTGGTTCAAAGACAGTTATTCAGATCAGGAGCCATGCCCAAAAATACTTTCTAAAGGTCCAAAAAAATGGGACTTTAGCACATGTTCCACCCCCTAGGCCTAAGCGCAAAGCTGCTCATCCATATCCTCAAAAGGCATCGAAAAATGCTCAAATGTCGCTTCACGTTTCC…
MYB		At5g04760	cDNA	648	ATGGCGTCAAGTCAGTGGACGAGGTCGGAGGATAAGATGTTTGAGCAAGCTTTGGTTCTTTTTCCTGAAGGATCTCCTAATCGGTGGGAGAGAATCGCTGATCAGCTTCATAAATCTGCTGGTGAAGTTAGGGAGCATTACGAGGTCTTGGTTCATGATGTTTTCGAGATTGATTCTGGTCGAGTTGATGTCCCTGATTACATGGATGACTCGGCGGCTGCGGCGGCGGGTTGGGATTCCGCTGGTCAGATCTCTTTTGGGTCTAAACATGGCGAGAGTGAACGCAAAAGAGGAACTCCTTGGACAGAGAACGAACACAAATTGTTTCTGATCGGATTAAAGAGATATGGTAAGGGAGATTGGAGGAGTATCTCGAGAAACGTTGTGGTGACGAGGACA…
MYB		At5g05090	cDNA	801	ATGAGAGAAGAAGATTCCAATTGGTTTGCTAAATGGGAAGAAGAGCTTCCGTCGCCGGAGGAACTCATACCTTTATCTCAATCTTTAATCACGCCTGATCTCGCCATCGCCTTCGATCTCCACCGTAACAACAACTCAAACTCCGGTCAACCTCTACCTCAAACCACACCGCCACAACCCAATTCCTCAGCCGAAATCGCCGGAGACTCTACCGGAGACGAACCAGCAAGAACGCTAAAACGACCGCGTTTAGTATGGACGCCACAGCTACACAAACGTTTCGTAGACGCGGTGGCTCATCTCGGGATAAAAAACGCGGTTCCTAAAACCATCATGCAGCTTATGAGCGTTGATGGTTTAACAAGAGAAAACGTCGCTAGCCATTTGCAAAAATACAGA…
Trihelix		At5g05550	cDNA	741	ATGGAGACGACGACGCCGCAGTCAAAATCAAGTGTGTCCCACCGACCGCCGTTGGGAAGAGAAGACTGGTGGAGTGAGGAAGCGACGGCGACGCTGGTAGAAGCCTGGGGCAATCGTTACGTCAAGCTGAACCACGGAAATCTCCGGCAGAATGACTGGAAAGACGTCGCCGACGCCGTTAACTCTAGACACGGTGATAACAGCCGTAAGAAGACCGACTTACAGTGTAAGAACCGGGTCGATACTTTGAAGAAGAAGTACAAAACAGAGAAAGCTAAACTCTCGCCGTCGACTTGGCGTTTCTATAACCGCCTCGATGTTCTAATCGGTCCCGTTGTGAAGAAATCGGCTGGCGGAGTTGTCAAATCAGCGCCTTTTAAGAATCATCTGAATCCAACT…
B3		At5g06250	cDNA	849	ATGTCAGTCAACCATTACTCCACAGACCACCACCACACTCTCTTGTGGCAGCAACAGCAACACCGCCACACCACCGACACATCGGAGACAACCACCACCGCCACATGGCTCCACGACGACCTAAAAGAGTCACTCTTCGAGAAGTCTCTCACACCAAGCGACGTCGGGAAACTCAACCGCCTCGTCATACCAAAACAACACGCAGAGAAATACTTCCCTCTCAATGCCGTCCTAGTCTCCTCTGCTGCTGCTGACACGTCATCTTCGGAGAAAGGGATGCTTCTAAGCTTTGAAGACGAGTCAGGCAAGTCATGGAGGTTCAGATACTCTTACTGGAACAGCAGTCAAAGCTATGTCTTGACTAAAGGATGGAGCAGATTTGTCAAAGACAAACAGCTC…
MADS	YES	At5g06500	G	729	ATGGCTCGGAAAAAAGTACGAGCTGCATGGATCCGTGACGATAGGATGAGGAGGGCAAGCCTCAAGAGGAGGTTAACGGGGCTTATCAAAAAAGTGAATGAACTGTCCATTCTGTGCGATATGCGCGCTAGTGTGGTCGTTTTCAATCGAGAAGAAGAACAATTGACGGCGTGGCCATCTCCCGAGGCAGCTAATTCACTCATCGACAACTTTTATTCTCTAACCGACCATGAAAGGACCATGAAGGCCGTTGATCCGGAGTCATACGTCCAGACCGTTATCGAAAAGATTGAGAAGAAACGAGCCGATACTCGGAAGGTTATCACGGAGTTTGAGATGGACGAACTCATGTTCCAAGTCCAAAATGGTCGTGAACTTGCTGATCTCTCCCCAACCGAG…
bZIP		At5g08141	cDNA	414	ATGTTCCAACAAAACTTACATGATGAAGACGACGTCCATGTTCAAGACCATGTCTACAATCATGACCAGTACCATCATCAACAACCGAATGTTGTGACGGATGAAGAGAAGAGGTTAAGGAGAATGGCGTCTAATCGAGAATCAGCAAGAAGAACGCGGATGCGTGAGCGGATGATGAAAGAGGGGTTGCAAATGCAAGTAAAACAACTCATGGCGTACAATCAATTCTTGTATAACAAATATATTAGCTTGTTGGAGTACAATCACCAGATCTTGCAAGAGAATTCACAGCTCAAAGAGACAGTTTCATCCTTTCATGATCAATATACTATATCTTATGGAAACCATGAAGGTATACTTGGAAACACCAATGATTTCGATTTAAACCAACTATCTTCG…	Base missing in vector after STOP codon		?
MYB		At5g08520	cDNA	897	ATGACGGTGGAGGAAGTTAGTGATGGTTCTGTGTGGAGTAGGGAGGATGATATTGCCTTTGAGAGAGCTCTAGCCAATAATACCGATGAATCAGAGGAACGGTGGGAGAAGATTGCTGCAGACGTTCCAGGCAAAAGTGTTGAACAGATTAAAGAACATTACGAGCTTTTAGTTGAAGATGTTACTAGGATTGAATCAGGATGTGTGCCTCTTCCTGCCTATGGGTCTCCTGAAGGATCGAATGGCCATGCTGGTGATGAAGGAGCAAGTAGTAAGAAAGGAGGTAACAGTCATGCGGGAGAGTCTAACCAAGCAGGTAAATCAAAGTCCGATCAAGAACGACGAAAGGGTATCGCGTGGACAGAAGATGAGCACAGGTTATTTCTTCTTGGTTTGGAT…
bHLH		At5g09460	U15588	981	ATGCCTCTTGATACCAAACAGCAGAAATGGTTGCCATTAGGCTTAAATCCTCAAGCTTGTGTCCAGGACAAGGCGACTGAGTATTTCCGTCCTGGAATTCCTTTTCCGGAACTCGGTAAAGTTTATGCAGCTGAGCATCAGTTTCGCTATTTGCAGCCACCGTTCCAAGCCTTATTGTCTAGATATGATCAGCAGTCTTGTGGAAAACAAGTTTCATGTTTGAATGGGCGATCTAGCAACGGTGCTGCTCCAGAGGGGGCACTCAAGTCTTCTCGGAAAAGATTTATAGTATTCGATCAGTCGGGAGAGCAGACTCGTTTGTTACAATGTGGATTTCCTCTGCGGTTTCCTTCTTCTATGGATGCAGAGCGAGGGAACATTCTCGGTGCCCTACACCCA…
AP2/EREBP		At5g11590	cDNA	711	ATGGCAGAGGAATACTACAGCCTCCGCTCGGAGAGAGTAACTCAGCTTCTTGTCCCTAACTCGGAGTCTGACTCAGTGAGTGACAAAAGCAAAGCTGAGCAAAGCGAGAAGAAGACTAAACGTGGGAGAGACTCCGGTAAACACCCTGTTTATCGCGGAGTAAGGATGAGGAACTGGGGAAAATGGGTGTCGGAGATTCGTGAGCCGAGGAAGAAATCACGTATTTGGCTGGGAACTTTCCCGACGCCGGAGATGGCGGCGCGTGCACACGACGTGGCGGCTCTGAGCATTAAAGGAACGGCCGCTATACTAAACTTCCCTGAACTCGCTGACTCATTCCCTCGACCCGTTTCATTAAGCCCTCGAGACATTCAGACAGCAGCTCTTAAAGCAGCTCAC…
AP2/EREBP		At5g13910	cDNA	636	ATGAACACAACATCATCAAAGAGCAAGAAGAAGCAAGACGATCAGGTTGGTACAAGGTTTCTTGGGGTGAGAAGAAGGCCTTGGGGAAGATACGCAGCTGAGATTAGAGACCCAACTACGAAGGAGCGTCACTGGCTTGGCACTTTCGATACGGCGGAAGAAGCTGCCTTGGCCTACGATAGAGCTGCTCGGTCCATGCGTGGCACACGTGCCAGAACCAACTTTGTTTACTCAGACATGCCTCCTTCCTCATCCGTCACCTCCATTGTTTCTCCTGACGATCCTCCTCCTCCTCCACCTCCTCCTGCTCCTCCTAGCAATGATCCTGTCGATTACATGATGATGTTTAACCAATACTCATCCACTGACTCGCCAATGCTTCAGCCTCATTGTGATCAA…
NAC		At5g14000	cDNA	621	ATGGAGGTGGAGAAGAGGATTGTAGTGAATGGAGGAATGAAATTGCCAATAGGATACAGATTTCACCCAACCGAGCAAGAGCTTATCCTTCATTACTTGCTCCCAAAGGCCTTTGCTTCTCCTTTGCCTTCCTCCATCATCCCTGTCTTTGACCTCTTCTTCTCTCATCCTCTTAGTTTCCCAGGGGACCAAAAGGAGAAGCAGAGGTACTTCTTTTGCAAGAAGAGAGAAGTGTCAAGTAATGAGCATAGAATCAAGATTTCCTCTGGTGATGGTTATTGGAAACCTATTGGTAAAGAGAGACCAATCATTGCCTGTGGTAAAACATTTGGGATTAGAAGAACACTTGCTTTCTATGAAACAAACAAGTCTTCTTCTTATTGCAACAAAACTAGATGG…
bHLH		At5g15160	cDNA	285	ATGTCTTCTAGCAGAAGGTCGAGACAAGCAAGCTCATCATCAAGAATTAGCGATGACCAGATCACTGATCTCATCTCAAAGCTCCGACAGTCCATTCCGGAGATTCGCCAGAACCGTCGTTCCAACACGGTATCAGCGTCGAAAGTGTTACAAGAGACTTGCAACTACATAAGAAACTTGAACAAGGAAGCCGATGACCTCAGTGATCGATTGACTCAGCTTCTGGAATCCATTGATCCTAATAGCCCACAAGCCGCAGTTATTAGGAGCTTGATTAATGGATAA	Base missing in the codon just before the STOP, so the STOP codon is out of frame.
bZIP		At5g15830	cDNA	561	ATGCAGCCAAATTATGATAGCTCAAGTCTTAACAACATGCAACAACAAGACTACTTCAACTTGAACAACTACTACAACAACTTAAACCCTTCAACCAATAACAACAACCTCAATATCCTCCAATACCCTCAAATTCAAGAACTCAACCTACAATCTCCGGTAAGCAACAACTCCACAACTTCCGATGACGCAACTGAAGAAATCTTCGTCATCAACGAGAGGAAGCAAAGACGTATGGTATCTAACAGAGAGTCAGCAAGAAGATCAAGAATGAGAAAGCAAAGACACTTAGATGAGCTTCTCTCACAGGTTGCTTGGCTTCGAAGCGAGAACCACCAGCTTTTAGATAAGCTTAACCAAGTCTCCGACAACAATGATCTTGTTATTCAAGAGAACTCG…	C instead of T at 43bp upstream of STOP. No change in aminoacid
MYB		At5g16560	cDNA	1212	ATGTCTATGGAAGGTGTTTTTCTAGAGAAAACCAAAACAAACACAACAACTACTCTCCCTGATCTATCTCTCCACATCAGTCTCCCAGATATTCATCAATACCATCACAATGAATCTTCTAAAGAATCTTCAAGAAGATCCTCCCAACTCGAAAACAACAACCGATCGTCCAACTTTGAACTCTCTTTATCTCATCATAACCATCCAACAGCAAGAATCTTCCATTGTCCTGATCGAAGAACCCTTAATCTTCCTCATCAGCAGCATTACAACAACCCTATCATCAATGGTGTTCATCAAAGGGTCGATGAATCCGAGATTAGTAATCTCCACCGTCCAATTAGAGGCATCCCGGTCTATCACAACCGTTCATTCCCTTTCCACCAACAAAACTCTTCA…
Chromodomain		At5g17690	cDNA	1338	ATGAAAGGGGCAAGTGGTGCTGTTAAGAAGAAACCCCAGGTGTTGAACGAAGCTGGTGAGGCGGATACGGCGGTGGAAACAGTCGGAGAAAGCCGGAAAATTAGTGGAGACGGTGGGTTTGGCAGTGACGACGGCGGAGGGGGAGGTGGAGGTGGAAGTGGAGAGTCGATTCTTCGCGAGATTGGTGATGATAGGCCTACGGAGGATGGAGATGAAGAAGAAGAAGAGGACGAGGATGAAGATGATGGAGGTGATGAGGAAGATGAAGAAGGAGAAGGAGAAGGTGGGCAAGAGGAAAGGCCAAAGCTTGATGAAGGGTTTTATGAAATTGAAGCTATTCGTCGTAAGAGAGTTCGAAAAGGCAAGGTTCAGTATCTAATTAAATGGCGCGGATGGCCT…	Forward and reverse sequences do not overlap
B3		At5g18090	cDNA	906	ATGAAGAACAAAGCGTTTGGTCAGATTATGGATGATGCAGAGAATCCCGGGTTCTTCAAGATCCTTCGAAGTGCAGATTTATCGTCTGAAATCATGAGAGGGATCCCTCTAAACTTCATCAAAAGCATCTCGGAAGAAGAGTTATCGGCTAAGATGTTGTTAAAAGTGTCATGGGGAAGTTCTTGGCCTATCAAAATTTGTAGAAACCCAAGCTTCTACTTTATGGAGAAAAAGGGATGGGATCAGTTTTTGAGCGACAATGGATTAGGTAATGATGAGTTTCTTACCTTCACACACCAAGGAAATATGTGCTTTACCGTGGACATCTACCAAATAGACGGTAAAGAGCTACTTACACCACGCAGATCTGCAACCATTGCTTCTAGTTCCGGTCGGAAC…
NAC		At5g18300	G	444	ATGATGCCGATGACTGAAGAATTTTACGATGAAGAGGAAGAGCTTGGTTGCTTTAGATTTAATCCTTCAGAAGAAGAACTCATACTCGATTATCTTCTACCAAAGCTTGGCTTCCACCAACCAAACACGATATATTTGTTAGAAGACAGGGACAACATCTACGCCAAAGAGCCGTGGCGGCTTAATCACACAGAGAATGATATCTTTGAACCTAACGAGTGGTTTTATTTCGTGAAAAGGACAAATCGCAAAGTTAAAGGTTGGAAAGCCACTGGAGAGTTAAAAGATGTCGTGTCGAAGAAAACCGGTGAAGTGATCGGGAAGAAGAGGAATCTCAGGTTCTACGTTGAAGGTGATGAGAGCAAAACGAGTGGTTGGACCATGAGGGAGTATTCTTCC…
AP2/EREBP		At5g18560	cDNA	1047	ATGTCAACCTCCAAAACCCTAGACCATAATAAACCATTTGAAACATCCCAAACGCAAATGGGTTTTGCTCTGATCCACCAAAACACATCCGCCAACACAACCACCACCACCACAACCGGCGAGAGACGAGGCCGGAGATCAAAGCAAGCGGAGCCAGGGAGGTTCCTAGGAGTCCGGAGACGTCCATGGGGTCGTTACGCAGCCGAGATAAGAGATCCAACCACCAAAGAACGTCACTGGCTAGGCACTTTCGACACAGCTCACGAAGCTGCTCTTGCCTACGATAGAGCTGCTCTTTCAATGAGAGGTACTCAAGCTCGAACCAACTTCGTCTACACTCCAACTGATGTCCACACCATCCTCACAAACCCTAATCTCCACTCTCTCATTGTCTCTCCT…
AP2/EREBP		At5g21960	cDNA	651	ATGGATGCATCCCCAAAGTACACAGGTGTACGGAAGAGGAAGTGGGGAAAATGGGTGGCTGAGATTCGTCTCCCCAACAGCCGTGACAGGATCTGGTTAGGCTCTTTCGACTCTGCTGAGAAGGCGGCGCGTGCTTTCGACGCGGCTCTTTACTGTCTTCGTGGCCCCGGAGCACGCTTCAACTTCCCCGACAATCCTCCGGAGATTCCCGGTGGTCGTTCTCTGACGCCGCAGCAGATTCAGGTCGTAGCTAGCCGTTTCGCCTGCGAGGAGGAGCTACTACCACCGGAACAACATCATCCGTCACCGCCACGTGGCGACCATAATACCGAGGAAGAAGTGATAATTTCGGCACGTGGGGAAATTAATAGTGGTAGTGGTGGGCCTACGTTAGGGCAA…
MYB		At5g23650	DQ056685	1014	ATGAATTTAGGACAGGAAATTAGTGTCGGATCGTCTTGGAGCAAGGATGATGATATTGCTTTCGAGAAAGCCCTTGCAATTTATAACGATAAAACAGAGATTCGTTGGAAAAAAATTGCTACAGTTGTTCCGGGAAAAACTTTAGAACAAGTTATAGAGCATTACAACATTTTAGCTCGTGATGTTATGTTGATTGAATCTGGATGTGTACGTCTTCCAGATTATGATGATTTTTTAGAAGAACCAAATCACAATGCTTTTGGTAAAGAAAGAAGCATATTGGAAGGTGGCAACGATCGCAAATATGAGTCTAAACACAAAGGTAAATCAAAACTAAAGCAAAAACGACGAAGGGGTGTTCCTTGGAAGCCTTTTGAACACAGACAATTTCTGCATGGT…	Forward and reverse sequences do not overlap
ERF		At5g25390	U51209	561	ATGGTACATTCGAAGAAGTTCCGAGGTGTCCGCCAGCGTCAGTGGGGTTCTTGGGTTTCTGAGATTCGTCATCCTCTCTTAGTGTGGCTAGGAACATTCGACACGGCGGAAACAGCGGCTAGAGCCTACGACCAAGCCGCGGTTCTAATGAACGGCCAGAGCGCGAAGACTAACTTCCCCGTCATCAAATCGAACGGTTCAAATTCCTTGGAGATTAACTCTGCGTTAAGGTCTCCCAAATCATTATCGGAACTATTGAACGCTAAGCTAAGGAAGAACTGTAAAGACCAGACACCGTATCTGACGTGTCTCCGCCTCGACAACGACAGCTCACACATCGGCGTCTGGCAGAAACGCGCCGGGTCAAAAACGAGTCCAAACTGGGTCAAGCTTGTTGAA…
MADS	YES	At5g26650	G	1101	ATGAAGAAGGTGAAGCTATCTTTGATAGCTAATGAAAGATCAAGGAAAACATCCTTCATAAAGAGGAAAGACGGGATTTTTAAGAAACTCCACGAGTTGTCAACTCTGTGTGGTGTCCAAGCTTGTGCTCTCATCTACAGTCCATTCATACCGGTTCCAGAGTCATGGCCGTCAAGGGAAGGTGCTAAAAAGGTGGCTTCAAGGTTTCTGGAGATGCCGCCGACAGCCCGAACCAAGAAGATGATGGATCAAGAGACTTACCTTATGGAGAGGATTACCAAAGCAAAAGAGCAACTAAAGAACCTGGCTGCTGAGAACCGAGAGTTACAGGTTAGACGATTTATGTTTGATTGTGTTGAAGGCAAAATGTCCCAGTATCATTATGATGCAAAAGACCTT…
ZZ		At5g26990	U63584	669	ATGGATTCTGATTCTTGGAGTGATCGTCTCGCATCGGCTTCAAGAAGATATCAGCTCGATTTCTTGTCTCGATCTGACAATTTCTTGGGGTTTGAGGAGATAGAAGGAGAAGATGACTTCAGGGAGGAGTATGCTTGCCCGTTCTGTTCAGACTATTTTGATATCGTCTCTCTATGCTGTCACATTGATGAAGATCATCCTATGGATGCAAAAAATGGGGTATGTCCCATTTGTGCGGTGAAAGTGAGCTCTGATATGATTGCTCATATAACCCTACAACATGCAAATATGTTCAAGGTGACGCGGAAAAGGAAATCAAGAAGAGGCGGGGCTCAATCCATGCTATCGATCTTGAAGAGAGAGTTTCCTGATGGAAATTTTCAGAGCCTATTTGAAGGA…
Trihelix		At5g28300	cDNA	1860	ATGTTTGATGGTGGAGTACCTGAGCAGATCCACCGTTTCATAGCTTCTCCACCGCCACCGCCTCCGCTTCCGCCGCATCAACCGGCGGCGGAAAGATCACTACCTTTTCCTGTCTCATTCTCTTCCTTTAACACCAATCATCAACCTCAGCATATGTTGAGCTTGGATAGCCGTAAGATCATTCACCATCATCATCATCATCATCACCATGACATCAAAGATGGTGGTGCTACTACTGGTGAGTGGATAGGTCAGACGGATCATGATGATAGCGATAATCATCATCAACATCATCATCATCATCCATGGTGTAGTGATGAAGTTCTTGCTCTTCTTAGGTTCAGATCTACAGTGGAGAATTGGTTCCCTGAATTCACTTGGGAGCATACTTCAAGAAAG…	Forward and reverse sequences do not overlap
G2-like	YES	At5g29000	cDNA	1242	ATGACTCTGGCTAATGATTTCGGATATTCGACCGCTATGTCTTCATCTTATTCAGCTCTTCATACTAGTGTAGAAGACAGATACCACAAGTTGCCTAACTCTTTTTGGGTTTCATCAGGTCAGGAACTGATGAATAACCCTGTACCGTGTCAGTCGGTCTCTGGTGGCAATTCTGGTGGTTATTTGTTTCCTTCTTCCTCTGGATACTGCAATGTTTCAGCTGTCTTGCCTCATGGAAGGAATTTGCAAAACCAGCCACCTGTTTCCACCGTGCCTAGAGACAGATTGGCTATGCAGGATTGTCCTTTGATAGCTCAATCCTCGTTGATTAATCATCACCCTCAAGAGTTCATAGATCCACTTCATGAGTTCTTTGATTTCTCTGATCATGTTCCTGTT…
MYB		At5g42630	cDNA	831	ATGATGATGTTAGAGTCAAGAAACAGTATGAGAGCTTCAAACTCAGTCCCAGATCTGTCTCTTCAGATCAGTCTTCCTAACTATCACGCCGGAAAACCTCTTCACGGCGGTGACCGGAGCTCCACAAGCAGTGATTCTGGAAGCAGCCTCAGTGACCTGAGCCATGAGAACAACTTCTTCAACAAACCTCTCTTGAGCTTAGGATTTGACCATCATCATCAAAGGCGCTCAAACATGTTCCAACCTCAAATCTACGGTCGAGATTTCAAGAGAAGCTCATCATCAATGGTTGGTCTTAAACGAAGCATTCGTGCTCCAAGAATGAGATGGACTTCTACTCTTCATGCTCACTTCGTCCATGCTGTTCAACTTCTTGGCGGCCATGAAAGAGCAACGCCT…
AP2/EREBP		At5g43410	cDNA	396	ATGGATCAAGGAGGTCGAGGTGTCGGTGCCGAGCATGGAAAGTACCGGGGAGTTCGGAGACGACCTTGGGGAAAATATGCAGCAGAGATACGAGATTCGAGGAAGCACGGTGAACGTGTGTGGCTTGGAACGTTCGATACGGCAGAGGAAGCGGCTAGAGCCTATGACCAAGCTGCTTACTCCATGAGAGGCCAAGCAGCAATCCTTAACTTCCCTCATGAGTATAACATGGGGAGTGGTGTCTCTTCTTCCACCGCCATGGCTGGATCTTCCTCCGCCTCCGCCTCCGCTTCTTCTTCTTCTAGGCAAGTTTTTGAATTTGAGTACTTGGATGATAGTGTTTTGGAGGAGCTCCTTGAGGAAGGAGAGAAACCTAACAAGGGCAAGAAGAAATGA
bHLH		At5g43650	cDNA	744	ATGGATAACTTTTTTCTAGGTTTGAGTTGTCAAGAAGAAAACAACTTCTGGGATCTAATCGTGGCCGACATCTCGGGTGATAGAAGCGTCAGTGTACCTATCAGAAGCGCCTTTAGGTCATATATGAAGGACACGGAACTGAGGATGATGTCGCCGAAGATATCTTCTTCGAAGGTGAACGTGAAGAAGAGAATGGTCAATCTTCTGAGAAAGAATTGGGAGGAGAAGAAAAATACGGTGGCTCCAGAGAAGGAAAGAAGCCGGCGACATATGTTGAAAGAAAGGACGAGAAGAGAGAAACAAAAACAGAGTTACTTAGCTCTCCATTCTCTACTACCATTTGCCACTAAGAATGACAAAAATTCGATTGTCGAAAAAGCCGTGGATGAGATTGCGAAA…
MYB		At5g44190	U13156	945	ATGTTAACTGTTTCTCCGGCTCCAGTACTCATCGGAAACAACTCAAAGGATACTTACATGGCGGCAGATTTCGCAGATTTTACGACGGAAGACTTGCCGGACTTTACGACGGTCGGGGATTTTTCCGATGATCTTCTTGATGGAATCGATTACTACGACGATCTTTTCATTGGTTTCGATGGAGACGATGTTTTGCCGGATTTGGAGATAGATTCGGAGATTCTTGGGGAATATTCCGGTAGCGGAAGAGATGAGGAACAAGAAATGGAGGGTAACACTTCGACGGCATCGGAGACATCGGAGAGAGACGTTGGTGTGTGTAAGCAAGAGGGTGGTGGTGGTGGTGACGGTGGTTTTAGGGACAAAACGGTGCGTCGAGGCAAACGTAAAGGGAAGAAA…
AP2/EREBP		At5g44210	cDNA	603	ATGGCTCCAAGACAGGCGAACGGTAGAAGCATTGCCGTGAGTGAAGGCGGCGGAGGGAAGACGATGACGATGACGACGATGCGGAAGGAAGTGCACTTTAGAGGTGTGAGGAAGCGTCCATGGGGTAGATACGCGGCGGAGATCCGTGACCCGGGAAAGAAAACCCGGGTTTGGCTCGGGACATTCGACACGGCGGAGGAAGCTGCAAGAGCTTACGACACCGCCGCTAGAGAGTTTCGTGGCTCCAAAGCAAAGACTAATTTCCCTCTTCCCGGAGAGTCTACTACGGTTAACGACGGTGGCGAGAACGATTCTTACGTCAACCGTACGACGGTGACGACGGCGCGTGAGATGACGCGTCAGAGATTTCCGTTTGCATGTCACCGGGAGCGTAAAGTC…
HSF		At5g45710	cDNA	1038	ATGGATGAAAATAATGGAGGTTCAAGCTCACTTCCACCTTTCCTTACTAAAACATATGAAATGGTTGATGATTCTTCTTCTGACTCGGTCGTTGCTTGGAGCGAAAACAACAAAAGCTTCATCGTCAAGAATCCAGCAGAGTTTTCAAGGGACCTTCTTCCGAGATTCTTCAAGCATAAGAATTTCTCAAGTTTCATCCGTCAGCTTAATACATACGGTTTTCGAAAAGTAGATCCTGAGAAATGGGAATTCTTGAATGATGATTTTGTTAGAGGTCGACCTTACCTTATGAAGAACATTCATAGACGAAAACCGGTTCATAGCCACTCGTTAGTGAATCTACAAGCGCAAAATCCTTTGACGGAATCAGAAAGACGGAGCATGGAGGATCAGATAGAA…
GATA		At5g47140	U67290	1413	ATGGGGAAGCAAGGTCCTTGCTATCACTGTGGAGTTACAAGTACACCTCTATGGAGAAACGGGCCACCAGAGAAGCCGGTGTTGTGCAATGCGTGTGGTTCGAGGTGGAGAACTAAAGGATCATTAGTAAACTACACACCTCTTCATGCTCGTGCTGAAGGTGATGAGACTGAGATTGAGGATCATAGAACTCAAACGGTGATGATTAAGGGAATGTCTTTGAACAAAAAGATTCCCAAGAGGAAACCATATCAAGAAAACTTCACAGTGAAAAGAGCTAACTTGGAATTCCATACCGGTTTCAAGAGGAAGGCTCTGGATGAAGAAGCTAGCAATAGATCGAGTTCAGGATCGGTTGTATCAAACTCCGAGAGCTGTGCACAATCTAATGCGTGGGAC…
AP2/EREBP	YES	At5g47220	G	732	ATGTACGGACAGTGCAATATAGAATCCGACTACGCTTTGTTGGAGTCGATAACACGTCACTTGCTAGGAGGAGGAGGAGAGAACGAGCTGCGACTCAATGAGTCAACACCGAGTTCGTGTTTCACAGAGAGTTGGGGAGGTTTGCCATTGAAAGAGAATGATTCAGAGGACATGTTGGTGTACGGACTCCTCAAAGATGCCTTCCATTTTGACACGTCATCATCGGACTTGAGCTGTCTTTTTGATTTTCCGGCGGTTAAAGTCGAGCCAACTGAGAACTTTACGGCGATGGAGGAGAAACCAAAGAAAGCGATACCGGTTACGGAGACGGCAGTGAAGGCGAAGCATTACAGAGGAGTGAGGCAGAGACCGTGGGGGAAATTCGCGGCGGAGATACGT…
MYB		At5g47390	cDNA	1098	ATGACTCGTCGATGTTCTCACTGCAATCACAATGGCCACAACTCTCGGACTTGTCCCAATCGCGGCGTGAAGCTCTTTGGTGTTCGGCTCACCGAAGGTTCGATCCGGAAAAGTGCAAGTATGGGTAATCTTAGCCATTACACGGGTTCTGGATCGGGTGGGCATGGAACCGGGTCCAACACTCCGGGTTCTCCGGGTGATGTCCCTGACCATGTCGCTGGTGATGGTTACGCTTCTGAGGATTTCGTTGCTGGCTCTTCCTCTAGCCGCGAGAGAAAGAAAGGAACTCCATGGACAGAGGAAGAACACAGGATGTTCTTATTAGGTTTACAGAAGCTGGGTAAAGGTGATTGGAGAGGTATCTCAAGAAACTATGTGACCACTAGGACACCTACACAA…
ZZ		At5g49230	cDNA	636	ATGGATTCGAATTCATGGATCAATTGTCCCCCTGTGTTTTCATCATCGCCTTCTTCACGCCGTTACCAATCTCGATCAGATTTGTATTTGGGAGATGTTGAAGGAGAAGACGATTTGAAAGCTGAGTTTATGTGTCCTTTTTGTGCAGATGAGTTTGATATTGTTGGTCTTTGTTGTCATATTGATGTGAATCATCCTGTTGAAGCTAAGAATGGGGTTTGTCCTGTCTGCACAAAGAAGGTGGGATTGGACATTGTTGGCCATATAACAACGCAACACGGGAACAGATTTTACGTGCAGCGAAGAAGAAGGTTGCGTAAAGGTGGATATAGCTCTACCTATCTTACTCTTAAAAAAGAGCTTCGAGAAGCTAACTTACAGTCTCTTGGAGGGTCTTCC…	15 bases missing at 285bp downstream the ATG (5 aminoacid less)
bHLH		At5g50010	cDNA	936	ATGGGACAAGATCGTGGGTTTGGGTTTCCTACTCAGCGCTTGTGTTCCTTGTCTTCCCTAGCTCTGTCTCATCTCGGGAAGCAAGACTTGAATTTAGTATCTAAAACCTGCGGCGACACCACCGACATGTTTTCTACTCGTGGATCTTATCAAGTTTCTACCCAAGTCTCTCAATCCTATTTTGATGGGTATTGTGGATGGGTTCATGGGTCATCCCACCTACAGCAGCAGTTCTTGCCTCCTCAAAACCAATGTATGAAGCAAGTACCTCTTCAAGTAGACGGTGTTATATCTAAAGCTGAGGAACAATGTAGTCAGAAGAGGTTCCTAGTGTTTGATCAGTCTGGAGATCAGACGACTTTGCTACTCGCTTCCGATATACGGAAATCTTTTGAGACC…
NAC		At5g50820	cDNA	555	ATGAACGGAAGAAGCATGAGACTCCCTCCCGGGTTTCGGTTCGATCCCGATGATGAAGATCTTGTGTTCGAGTATCTCGCCAAGAAGGTCCTCCACCGTCCAATGGACTTCGATCTCCCTGAGCTCCGTTCTTGCAATGTTGATCCATGGGACTTGCTAGGAGAGAAGAACAAGGAAGTGTATTACTTCGTGAAGAAGGAAGAGCGAGAGAGGAAGGGAAGAGAGACGTTATCCGGTTATTGGGAAGAGTGTGAAGAAGAGGAAGTAATGGAGGCTGGTGGTCGTGATTGTATTCATTTAGAAGGAAGGAGAAAGACATTTGCTTTCTTTATTGGAAAAAAACCTCGAGGGACAATAACTCCATGGATCATGTACGAGTTCCGACTTCTTTCCTCTAGA…
MYB		At5g52660	cDNA	996	ATGGTCTCTAGAAATTCTGACGGATATTTCTTGGATCCGACCGGTATGACTGTTCCTGGTCTCGGACCTTCCTTTACAGCCGCCGTTTCTTCTTCTTCTTCACCAACGACTTCTTCTACGGCCGTGGCTGTGGCGGATGTGACGGCGATGGTTTCTTCTTCGGAGGAGGATTTGAGTAAGAAGATTAGGAAGCCTTATACTATTACTAAGTCTAGAGAGAGCTGGACGGAGCCTGAGCATGATAAATTCCTTGAAGCTCTTCAATTGTTTGATAGAGACTGGAAGAAGATTGAAGCTTTTATTGGTTCAAAGACAGTGATTCAGATACGAAGTCATGCTCAGAAGTATTTTCTTAAGGTACAAAAGAGTGGGACCGGTGAACATCTCCCTCCTCCTCGA…
AP2/EREBP		At5g53290	cDNA	1065	ATGGACGAATATATTGATTTCCGACCATTGAAGTACACAGAGCACAAGACTTCAATGACTAAATACACCAAAAAGTCATCGGAAAAACTTTCCGGTGGTAAGTCATTGAAAAAGGTTAGTATTTGTTATACTGATCCTGACGCAACAGATTCATCAAGTGACGAAGACGAAGAAGATTTCTTGTTTCCTCGCCGGAGAGTCAAAAGATTCGTTAACGAGATCACTGTTGAGCCTAGCTGTAACAACGTCGTCACCGGAGTTTCGATGAAAGATAGAAAGAGACTCTCTTCTTCCTCCGATGAAACTCAATCTCCGGCGTCGAGTCGTCAACGTCCTAATAACAAAGTTTCAGTCTCCGGTCAGATAAAGAAGTTCCGTGGTGTTAGACAACGGCCATGG…
HSF		At5g54070	U18576	996	ATGACGGCAATTCCAAACGTCGTCGATATTGAATCTTCTTCCTCTTCGCTTTGTCAAGAGACGGCAACGGAGACCGTCACCGTTGAAAGAGGCTCGTCTGATTCATCTTCAAAGCCAGACGACGTCGTTTTACTAATCAAGGAAGAGGAGGATGACGCCGTTAACTTGTCACTTGGTTTTTGGAAATTGCACGAGATAGGTTTAATAACACCGTTCTTGAGAAAGACGTTTGAGATCGTCGATGACAAAGTAACAGACCCGGTTGTATCATGGAGCCCGACCCGTAAAAGCTTTATCATTTGGGATTCTTACGAGTTCTCAGAGAATCTACTTCCCAAATACTTCAAGCACAAGAACTTCTCCAGTTTTATTCGTCAGCTTAACTCTTACGGTTTTAAA…
bHLH		At5g54680	cDNA	705	ATGGTGTCACCCGAAAACGCTAATTGGATTTGTGACTTGATCGATGCTGATTACGGAAGTTTCACAATCCAAGGTCCTGGTTTCTCTTGGCCTGTTCAGCAACCTATTGGTGTTTCTTCTAACTCCAGTGCTGGAGTTGATGGCTCGGCTGGAAACTCAGAAGCTAGCAAAGAACCTGGATCCAAAAAGAGGGGGAGATGTGAATCATCCTCTGCCACTAGCTCGAAAGCATGTAGAGAGAAGCAGCGACGGGACAGGTTGAATGACAAGTTTATGGAATTGGGTGCAATTTTGGAGCCTGGAAATCCTCCCAAAACAGACAAGGCTGCTATCTTGGTTGATGCTGTCCGCATGGTGACACAGCTACGGGGCGAGGCCCAGAAGCTGAAGGACTCCAAT…
MYB		At5g56840	cDNA	702	ATGGGCAGAAGATGCTCACACTGTGGAAACGTAGGACATAACTCAAGAACATGTTCTTCTTACCAAACAAGAGTAGTTAGGCTCTTTGGTGTTCATCTAGACACCACAAGCTCTTCTCCGCCGCCTCCTCCTCCTCCCTCGATTTTGGCCGCTGCAATAAAGAAAAGTTTCAGCATGGATTGCTTGCCGGCATGTTCCTCCTCTTCCTCTTCCTTTGCTGGTTATCTCTCCGATGGTCTCGCCCATAAAACACCTGACCGCAAAAAAGGGGTTCCATGGACGGCGGAAGAGCACCGGACGTTTCTAATTGGATTAGAAAAGCTTGGAAAAGGAGATTGGAGAGGAATCTCTAGAAACTTCGTCGTCACAAAATCCCCGACACAAGTGGCAAGTCATGCT…
MYB		At5g59430	cDNA	1737	ATGGTGTCGCATAAGTGTGTAGAAGAATTTGGATACGCAAGCTACCTGGTACCTTCCAATGCAAGAGCACCCAGATCCGCCCGGAAGAGGCGCAGTATCGAGAAGAGGATAAGTAAAGAAGATGATAATATGTGTGCAATTGATCTATTGGCCACCGTAGCTGGACACTTGTCATTTGAGAGTGGGAGTTCTCTCATGTCTATTGACAAACTGATTGAAGATCATCGTGTAAAGGAGGAATTCCCGGAGGAAGAAAAACCTCTAATGCCAGTAGCTTTATCCCCTTATCGGGGATCTTTGAGTCCCTGCGGATTCAGTTCTGTGATAAATGGCAAAGTAGAGAATGAGGTAGATGGTTTTAGTTACTCTGGTGGTAGTGATGCTTGTCAAGTCGGGAAC…
AP2/EREBP	YES	At5g60120	cDNA	1458	ATGCTGGATCTCAATCTCGACGTCGACTCGACCGAGTCTACTCAGAACGAACGAGATTCGATTACTGTTAAAGGGGTTTCTTTGAATCAGATGGATGAATCGGTGACGTCGAACTCTTCTGTTGTTAATGCTGAAGCTTCTAGCTGTATAGATGGTGAAGATGAGTTGTGCTCTACACGAACGGTCAAGTTTCAATTTGAGATACTGAAAGGAGGAGGAGAAGAAGAAGAAGAAGATGATGATGAAAGAAGTGCTGTGATGATGACTAAGGAGTTTTTTCCTGTTGCTAAAGGCATGAACTTTATGGATTCGAGCGCTCAAAGTTCAAGGAGCACCGTTGATATTTCCTTCCAGAGGGGGAAACAAGGTGGAGACTTTATAGGTAGCGGGAGCGGTGGT…	G instead of A (S instead of N)
B3		At5g60140	cDNA	987	ATGAACACAAGAGGAAATTACTCTAATGGTTTTACTTCAAAGTTCTTTAAACCGTACCTTCCTAGTGAATCCGGTGATGATCTGGTACTACCCATTTCTTTCAACAGCTGTTTACCAAAGTCTTTGCCTAAAACTGTAACTGTTAGAAGCATTTCTGGAAACATTTGGAAATTAGGGTTTAAGAAATGTGGTGGTGAGGTTGAGAGATTTGTTATGGTTAGTGGTTGGAAGAAGATTGTAAGGGACGAAAACCTGAACGGTGGAGATCTCTTGTCATTTGAGTTTGATGGCTCTCATTTTTTTAATTTCTCTATCTTTGACCATGAGACTACGTGTAAGAGGCTTAAGAGAAGTTCAGAGCAAAGCAAGGACATCATCAAAGTGGGATCTGATTGTGAA…
DOF		At5g60200	U23476	774	ATGGATCATTTGTTACAACACCAGGATGTTTTTGGGAATTATAACAAAGCAAGAGAAGCAATGGGACTATCATATTCATCAAACCCAACACCGTTAGATAACGACCAGAAGAAACCTTCTCCTGCAACGGCTGTGACAAGGCCACAGCCTCCGGAGCTAGCTCTCAGGTGTCCACGTTGCGACTCAACAAACACAAAGTTTTGTTACTACAACAACTACAGTCTCACTCAGCCTCGCTACTTCTGCAAATCATGCCGGAGATATTGGACTAAAGGTGGAACTCTAAGGAACATCCCCGTGGGTGGAGGCTGCCGGAAAAACAAACGATCCACATCTTCGGCTGCAAGAAGCCTCAGAACCACTCCAGAACCGGCGTCCCACGACGGGAAAGTCTTCTCG…
DOF	YES	At5g60200	U23476		ATGGATCATTTGTTACAACACCAGGATGTTTTTGGGAATTATAACAAAGCAAGAGAAGCAATGGGACTATCATATTCATCAAACCCAACACCGTTAGATAACGACCAGAAGAAACCTTCTCCTGCAACGGCTGTGACAAGGCCACAGCCTCCGGAGCTAGCTCTCAGGTGTCCACGTTGCGACTCAACAAACACAAAGTTTTGTTACTACAACAACTACAGTCTCACTCAGCCTCGCTACTTCTGCAAATCATGCCGGAGATATTGGACTAAAGGTGGAACTCTAAGGAACATCCCCGTGGGTGGAGGCTGCCGGAAAAACAAACGATCCACATCTTCGGCTGCAAGAAGCCTCAGAACCACTCCAGAACCGGCGTCCCACGACGGGAAAGTCTTCTCG…
bZIP		At5g60830	cDNA	567	ATGATTAGACATCTAAAACCCTACATGGAGTCGTCTAGTGTCCATCGCTCTCATTGTTTCGATATTCTTGATGGAGTCCCACTACACGACGATCATTTCAACTCGGCATTCCTACCAAACACTGACTTTAATGTTCATTTGCAGTCAAACGTATCGACCCGCATCAACAATCAGTCTCACTTAGACCCAAATGCAGAAAACATTTTCCATAACGAAGGTCTTGCTCCAGAAGAAAGAAGAGCAAGAAGAATGGTCTCTAACCGGGAATCTGCAAGGAGGTCACGTATGCGCAAAAAGAAGCAGATCGAAGAGCTGCAACAACAAGTTGAACAACTCATGATGTTGAATCATCACTTGTCTGAGAAAGTCATCAACTTGTTGGAAAGCAACCATCAGATC…
DOF	YES	At5g60850	G	924	ATGCAAGATATTCATGATTTCTCCATGAACGGAGTTGGTGGTGGGGGAGGAGGAGGAGGGAGGTTTTTCGGTGGAGGAATCGGCGGCGGAGGAGGTGGTGATCGAAGGATGAGAGCTCATCAGAACAATATACTTAACCATCATCAATCTCTCAAGTGTCCTCGTTGTAATTCTCTTAACACAAAGTTCTGTTACTACAACAATTACAATCTTTCTCAGCCTCGTCACTTTTGCAAGAACTGTCGTCGTTACTGGACTAAAGGTGGTGTTCTCCGTAACGTTCCCGTCGGAGGTGGTTGCCGGAAAGCTAAACGTTCGAAAACAAAACAGGTTCCGTCGTCGTCATCAGCCGACAAACCAACGACGACGCAAGATGATCATCACGTGGAGGAGAAATCG…
NAC		At5g61430	cDNA	1011	ATGGAGACTTTTTGTGGGTTTCAAAAGGAGGAAGAGCAGATGGATTTACCTCCTGGGTTCAGGTTTCATCCAACAGATGAAGAACTCATAACTCACTATCTCCATAAGAAGGTTCTTGACACCAGCTTCTCAGCTAAAGCTATCGGTGAAGTTGATTTAAACAAATCAGAGCCATGGGAGTTACCATGGATGGCAAAAATGGGTGAGAAAGAATGGTATTTTTTCTGTGTGAGAGACAGAAAGTATCCCACCGGTTTAAGAACTAACCGAGCAACTGAAGCCGGTTATTGGAAGGCGACCGGGAAGGATAAAGAGATATACCGAGGCAAATCACTTGTTGGGATGAAGAAGACACTTGTTTTCTATAGAGGAAGAGCTCCTAAAGGTCAGAAAACCAAC…	G instead of A towards the end resulting in R instead of Q.
bHLH		At5g62610	cDNA	846	ATGGACCCTCCACTAGTGAACGATTCCTCCTTCTCTGCAGCTAATCCTTCTTCTTACACTCTCTCCGAGATTTGGCCTTTCCCTGTAAACGACGCCGTTCGCTCTGGTCTCCGTTTAGCTGTTAACTCCGGTCGAGTCTTTACTCGCTCTGAACATTCCGGCAATAAAGACGTCTCCGCGGCTGAGGAATCTACAGTCACCGATCTAACTGCTGGCTGGGGAAGTAGAAAGACTAGAGATTTGAACTCTGAGGATGATTCTTCAAAGATGGTTTCTTCCAGCAGCAGTGGTAATGAATTGAAAGAATCAGGGGATAAGAAAAGAAAACTGTGTGGATCTGAAAGTGGAAATGGAGATGGTTCGATGAGACCTGAAGGCGAAACAAGTTCGGGTGGTGGT…
bHLH		At5g64340	cDNA	1047	ATGCCTCTGGATAAGAGGCAACGGGATTTGCCTCTGGGCTTAAGTCCTCAAGCTTGCTTCAAGGATATAGTAGGTCGGTCTGTCCTTCCTAGAATTCCTCTCCCTGAGCTTGGGAAACTATATGCAGCTAAGCTTCAGGCTCGCTGTTTGCAGCCACCACCATTCCAGTCTTTGCTGTGCAGTCATGATAAGGAGTCTTATGGAAAAAGATTCTCACGGTCTGACATGCGGTCTTGGTGCGCTGCTGCTACTACTACTACTACTCCACTTGGAGCATTAGAGTCTTCTCAGAAAAGACTTTTGATATTCGATCAGTCAGGAGACCAGACTCGTCTATTACAATGTCCATTTCCTCTACGGTTTCCATCTCATGCGGCTGCAGAACCAGTGAAACTCTCT…	39 extra base pairs upstream the ATG and downstream the recombination sequence.
Chromodomain		At5g64610	cDNA	1338	ATGGGATCGTCTGCGGATACAGAGACGGCGATGATAATCGCCACACCGGCGTCGAACCATAATAATCCGGCAACCAACGGCGGAGATGCGAATCAGAATCATACTTCTGGTGCGATACTCGCTCTCACGAATTCAGAATCGGATGCTTCGAAGAAGAGAAGAATGGGGGTGCTTCCGCTCGAGGTTGGTACTCGCGTGATGTGTCAATGGAGAGACGGAAAATACCATCCGGTGAAGGTTATCGAGCGCCGAAAGAATTATAATGGTGGTCACAATGATTACGAGTACTACGTTCATTACACAGAGTTTAATAGAAGATTGGATGAATGGATTAAGCTTGAACAGCTTGACCTTGATTCAGTAGAGTGTGCTTTAGATGAAAAAGTTGAAGACAAGGTG…
AP2/EREBP		At5g64750	cDNA	1176	ATGTGTGTCTTAAAAGTGGCAAATCAGGAAGATAACGTTGGCAAAAAAGCCGAGTCTATTAGAGACGATGATCATCGGACGTTATCTGAAATCGATCAATGGCTTTACTTATTCGCAGCCGAAGACGACCACCACCGTCATAGCTTCCCTACGCAGCAGCCGCCTCCATCGTCGTCGTCCTCATCTCTTATCTCAGGTTTCAGTAGAGAGATGGAGATGTCTGCTATTGTCTCTGCTTTGACTCACGTTGTTGCTGGAAATGTTCCTCAGCATCAACAAGGAGGCGGTGAAGGTAGCGGAGAAGGGACTTCGAATTCGTCTTCTTCCTCGGGGCAGAAAAGGAGGAGAGAGGTGGAGGAAGGTGGCGCCAAAGCGGTTAAGGCAGCTAATACTTTGACG…
bHLH		At5g65320	cDNA	891	ATGATGTTCCAACAAGATTACCCTCATGGCTTTTCACTCGTGGAAACATCCTTAAGTTACGAAATGTTGGATTACTTTCAAAACATCGTCGTTTCGAACTCTGAAGACGTGGCGTCACAGCAAAATTCCATTTCGTCCTCTTCTTATTCATCAGCGACACTCTCCTGCTCCATAACAGAGCAAAAATCTCACTTAACTGAAAAGTTATCTCCTCTACGAGAAAGATATGGTTGCGGTGACTTTCTGTCGCGGAAGAGGAGAAGGAGAAGTGAAAAAACGATTGTAGATAAAGAGAATCAAAGGATGAATCACATTGCCGTCGAGCGTAACCGGAGAAAACAGATGAATCATTTTCTGTCTATCCTCAAGTCTATGATGCCTCTCTCTTATTCTCAACCT…
HD	YES	At5g66700	U84186	687	ATGGATCATGGTAGGTTAATGGATGATCAAATGATGCTAGGCTCTCAAGTGTACCCCTACACGACCCAACCCCAAAATTCACACTGCATCATCGTTAACCAGATCGATGGAGGCGAAGAATCAAAACCGGTGAAGCGGAGGAGGAAGAGGAGGAGTAAAGGTTCATCAGCCACCAACGAAGAAGACGTGGCGGAGATCGGAGGGATGTTGAGGAAGAGGAAGTTGACCGATGAACAAGTGAACATGCTCGAATATAGCTTCGGGAACGAGCATAAGCTGGAGTCAGGGAGGAAGGAGAAGATCGCCGGAGAGTTAGGTCTTGACCCGAGACAGGTGGCTGTTTGGTTCCAGAACCGCCGTGCACGTTGGAAGAACAAGAAACTAGAGGAAGAGTACGCC…
DOF		At5g66940	G	678	ATGCCTTCTGAATTCAGTGAATCTCGTCGGGTTCCTAAGATTCCCCACGGCCAAGGAGGATCTGTTGCGATTCCGACGGATCAACAAGAGCAGCTTTCTTGTCCTCGCTGTGAATCAACCAACACCAAGTTCTGTTACTACAACAACTACAACTTCTCACAACCTCGTCATTTCTGCAAGTCTTGTCGCCGTTACTGGACTCATGGAGGTACTCTCCGTGACATTCCCGTCGGTGGTGTTTCCCGTAAAAGCTCAAAACGTTCCCGGACTTATTCCTCTGCCGCTACCACCTCCGTTGTCGGAAGCCGGAACTTTCCCTTACAAGCTACGCCTGTTCTTTTCCCTCAGTCGTCTTCCAACGGCGGTATCACGACGGCGAAGGGAAGTGCTTCGTCGTTC…
MYB		At5g67580	cDNA	900	ATGGGTGCACCAAAGCAGAAGTGGACACCGGAAGAAGAAGCAGCTCTTAAAGCTGGAGTTCTTAAGCATGGGACTGGGAAGTGGCGTACCATACTCTCGGATACTGAGTTTAGTTTAATCCTTAAGTCTCGCTCTAATGTTGATCTTAAGGACAAATGGAGAAATATAAGCGTGACAGCTTTATGGGGTTCAAGGAAGAAGGCTAAACTTGCGCTTAAGAGGACTCCACCAGGTACTAAACAGGATGATAACAACACAGCTCTTACCATTGTGGCTTTGACTAATGATGATGAACGTGCAAAACCAACTTCCCCCGGAGGTTCTGGTGGTGGATCACCACGCACTTGTGCTTCTAAGAGATCAATTACAAGTTTGGATAAGATCATCTTTGAGGCAATT…	It conatins sequence predicted to be an intron and encodes a 190 aminoacid protein instead of 299. Differencial splicing?
G = genomic DNA
